# Supplementary material for: Protein-Protein Interactions in a Crowded Environment: An Analysis via Cross-Docking Simulations and Evolutionary Information
Source: PubMed Central journal article supplement (PMC3854762; doi:10.1371/journal.pcbi.1003369), 2013-12-05
Supplement: pcbi.1003369.s001.pdf [file pcbi.1003369.s001.pdf]

Text S1

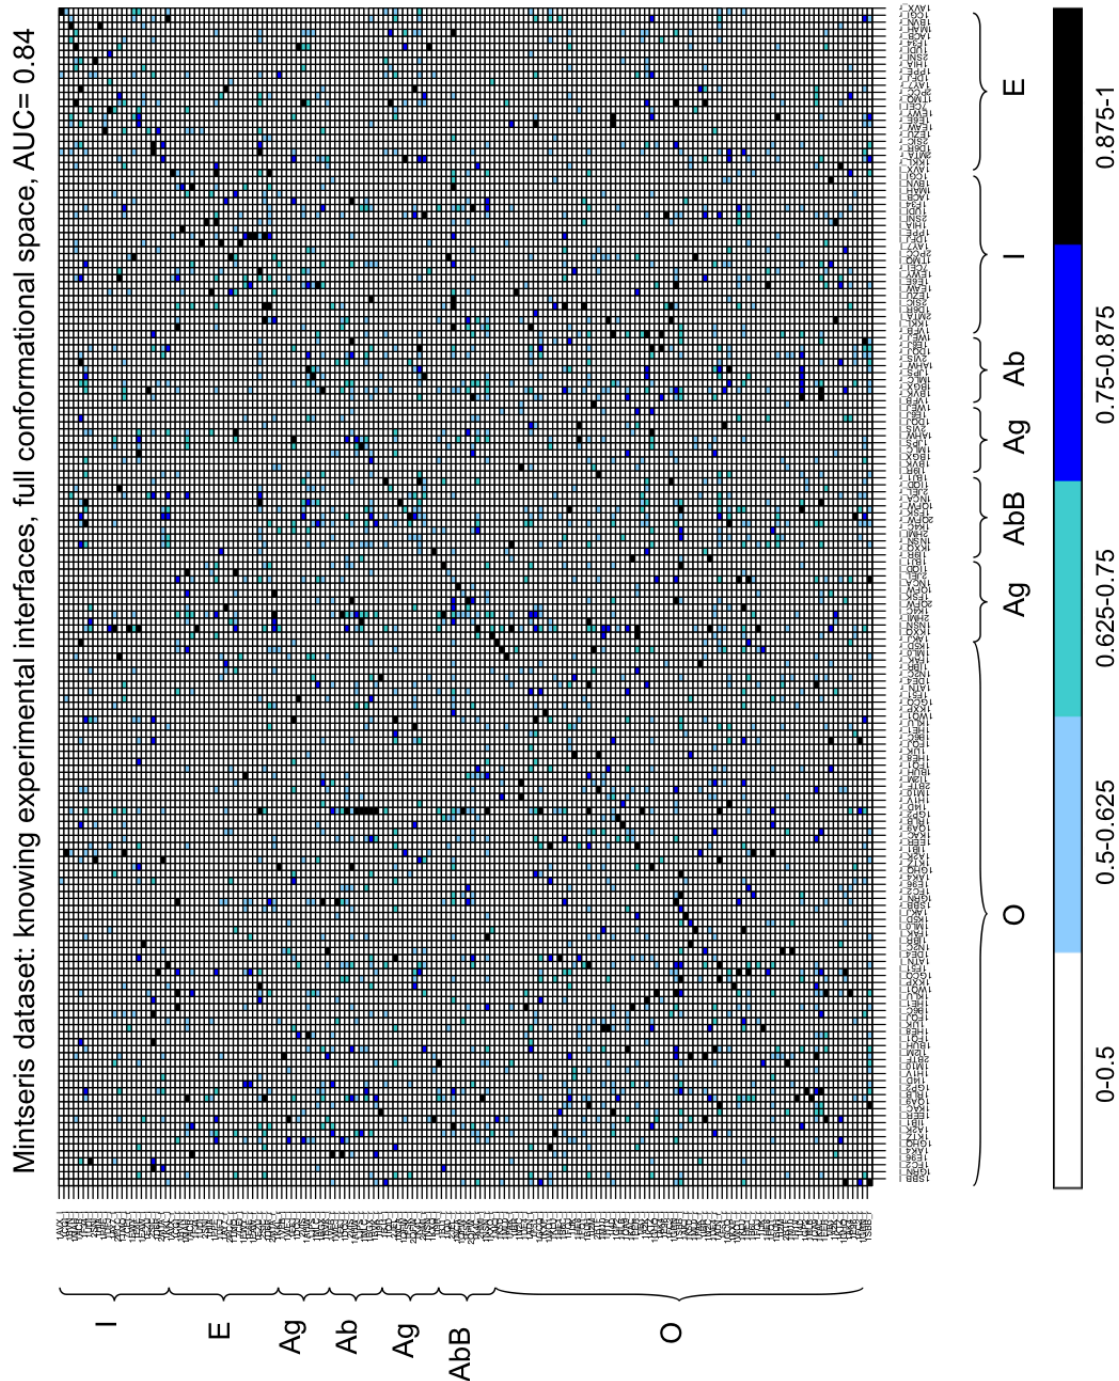

Figure S1: NII matrix for the Mintseris Database 2.0 - experimental interfaces computed over the full conformational space. The matrix is ordered with the experimental complexes lying on the trailing diagonal. Protein structures labelling columns and rows are grouped in functional classes: Enzymes (E), Inhibitors (I), Antibodies (Ab), Antigens (Ag), Bound Antibodies (AbB), Others (O). Each entry of the matrix corresponds to the NII value computed for the corresponding pair of proteins. High interaction scores (between 0.7 and 1, blue and black in the color scale) indicate a high interaction probability. Interaction scores are computed using knowledge of the experimental interfaces. The matrix has AUC=0.84.

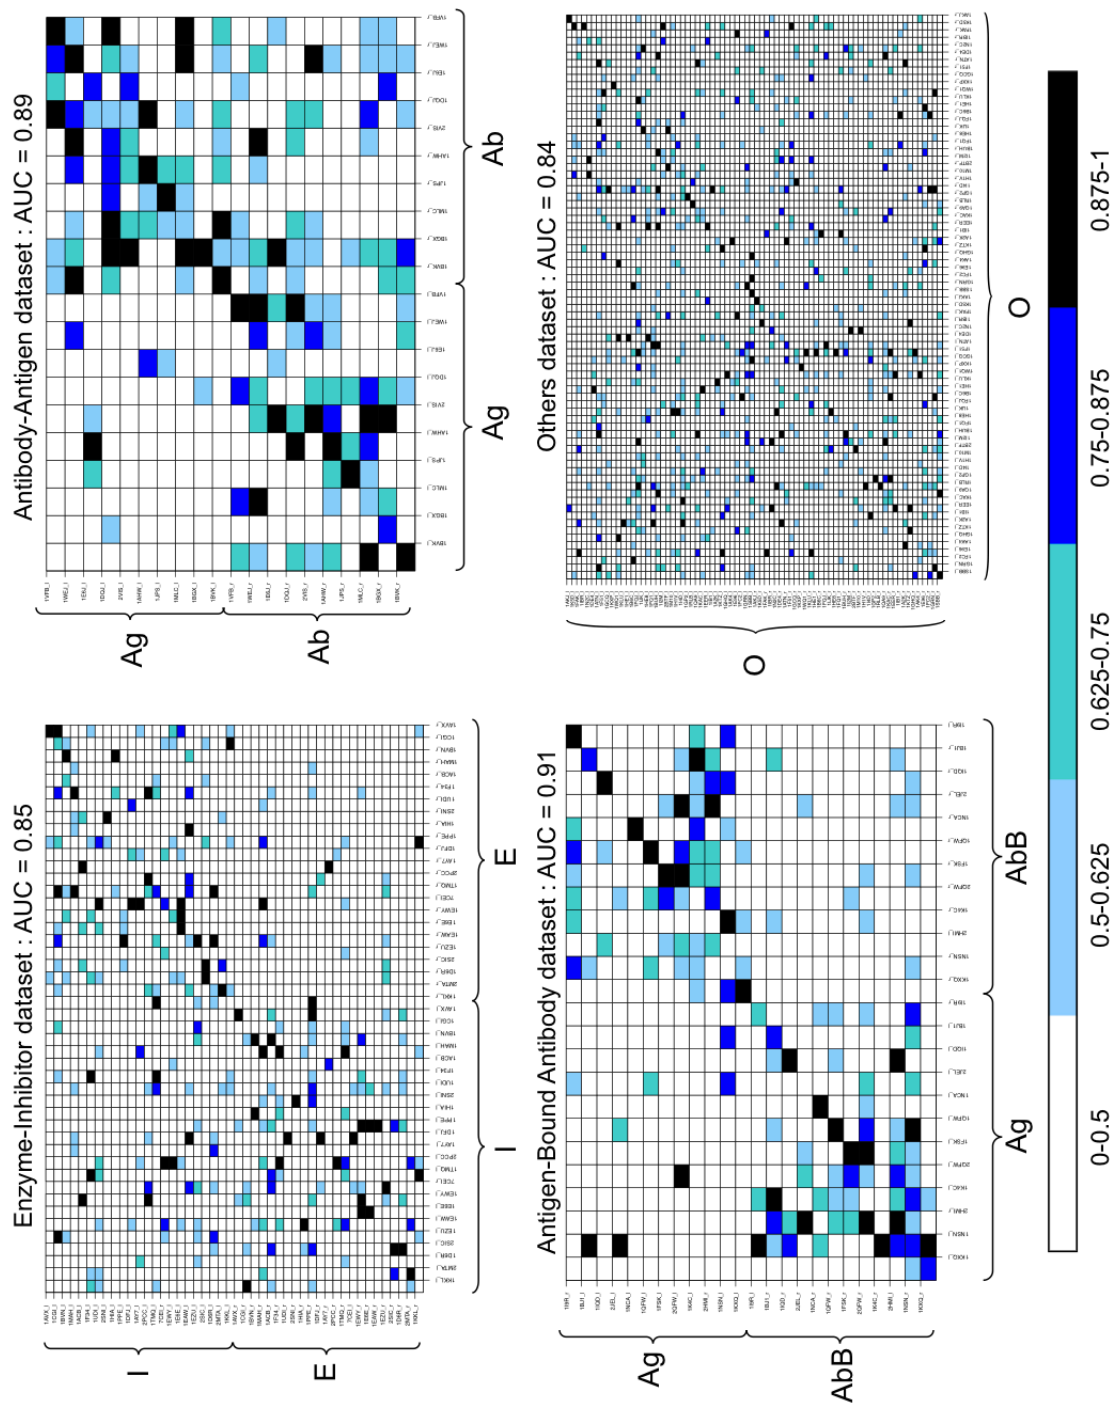

Figure S2: NII matrices for functional classes of proteins - experimental interfaces computed over the full conformational space. Enzyme-Inhibitors (EI; top left), Antibody-Antigen (AbAg; top right), Antigen-Bound Antibody (AgAbB; bottom left), Others (O; bottom right). Matrices are ordered with the experimental complexes lying on the trailing diagonals and, for each matrix, protein structures are grouped in functional classes. Each entry of a matrix corresponds to the NII value computed for the corresponding pair of proteins. High interaction scores (between 0.7 and 1, blue and black in the color scale) indicate a high interaction probability. Interaction scores are computed using knowledge of the experimental interfaces.



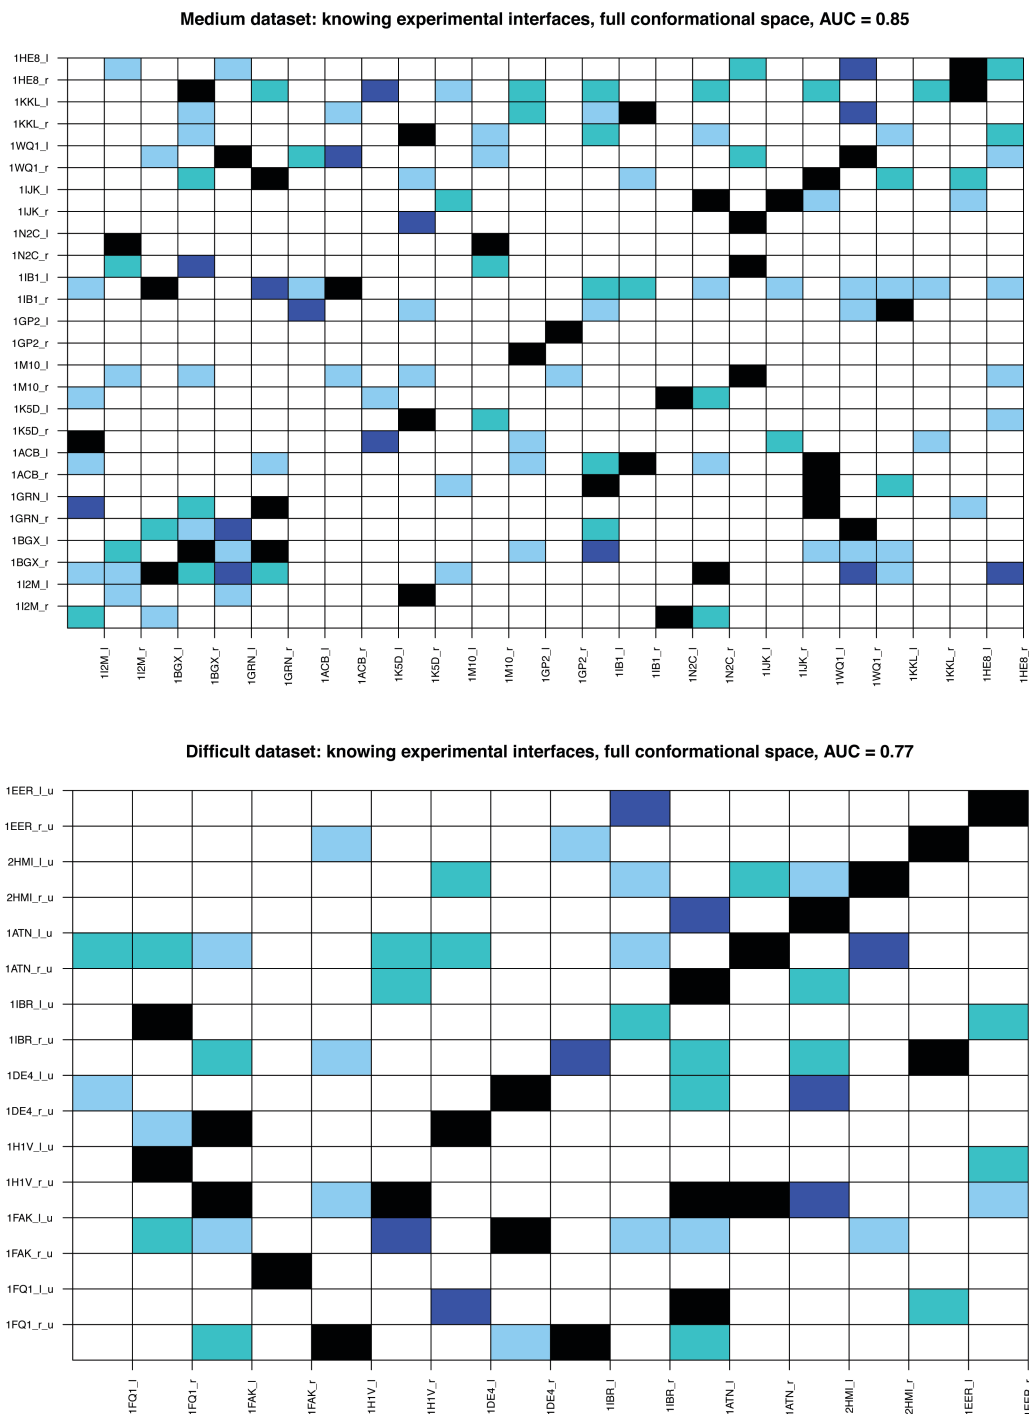

Figure S4: NII matrix for Medium (top) and Difficult (bottom) proteins - experimental interfaces computed over the full conformational space. Matrices are ordered with the experimental complexes lying on the trailing diagonals. Each entry of a matrix corresponds to the NII value computed for the corresponding pair of proteins. High interaction scores (between 0.7 and 1, blue and black in the color scale) indicate a high interaction probability. Interaction scores are computed using knowledge of the experimental interfaces. The matrix of medium interfaces has AUC=0.85, and the one with proteins with difficult interfaces has AUC=0.77.

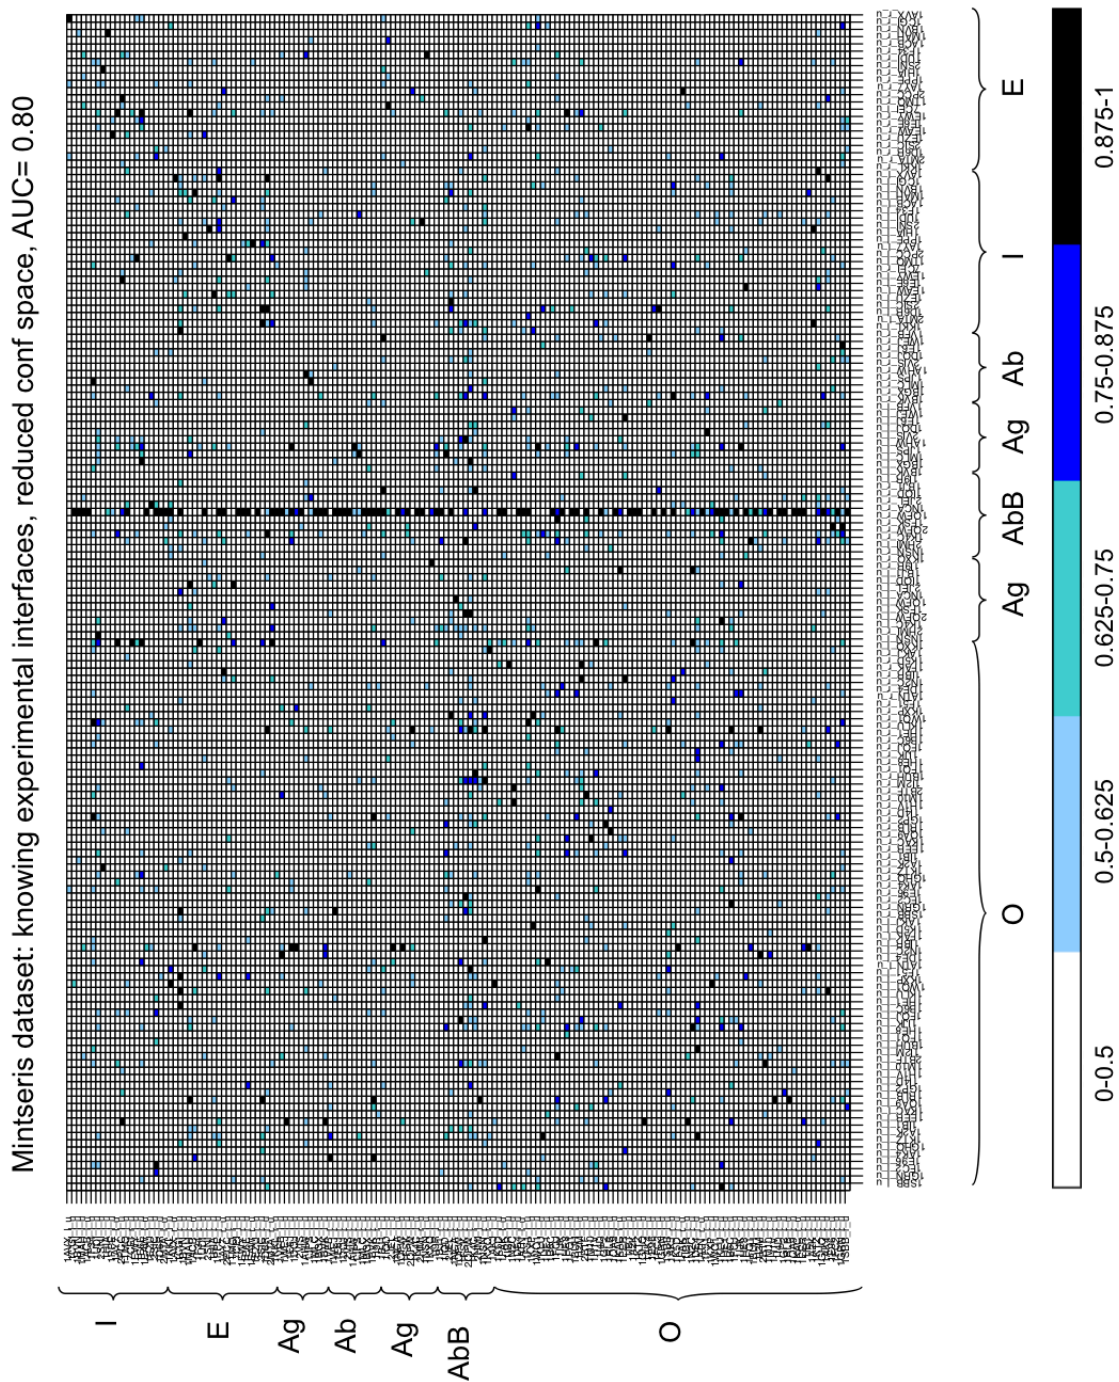

Figure S5: **Normalized Interaction Index (NII) matrix for the complete dataset of 168 proteins restricted to a cone around the receptor.** The matrix is ordered with the experimental complexes lying on the trailing diagonal. Each entry of the matrix corresponds to the NII value computed for the corresponding pair of proteins. High interaction scores (between 0.7 and 1, blue and black in the color scale) indicate a high interaction probability. Interaction scores are computed using knowledge of the experimental interfaces. The plot corresponds to an AUC=0.80.

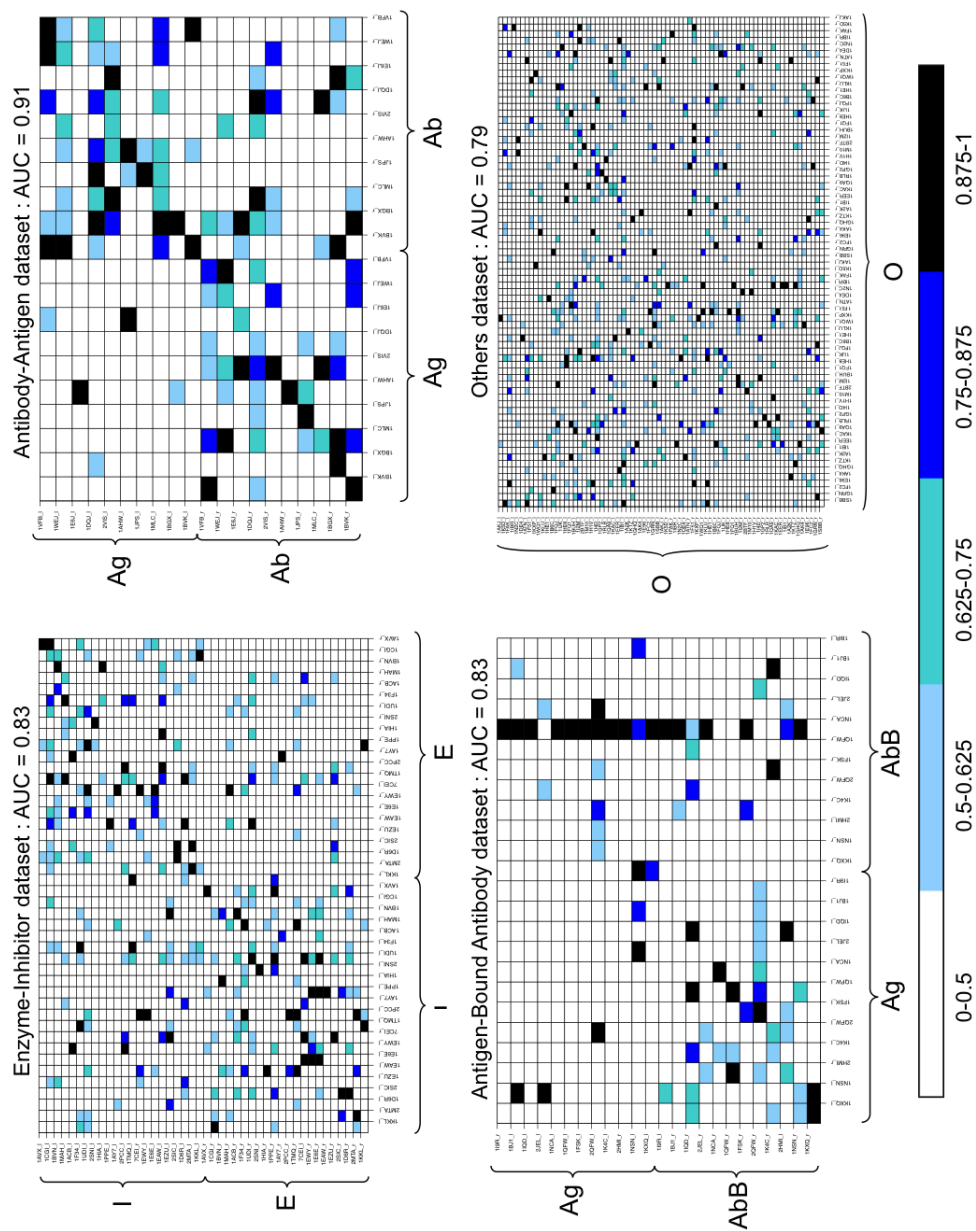

Figure S6: NII matrix for functional classes of proteins - experimental interfaces computed over the **restricted conformational space**. Enzyme-Inhibitor (top left), Antigen-Antibody (top right), Antigen-Bound Antibody (bottom left), Others (bottom right). Matrices are ordered with the experimental complexes lying on the trailing diagonals. Each entry of a matrix corresponds to the NII value computed for the corresponding pair of proteins. High interaction scores (between 0.7 and 1, blue and black in the color scale) indicate a high interaction probability. Interaction scores are computed using knowledge of the experimental interfaces.

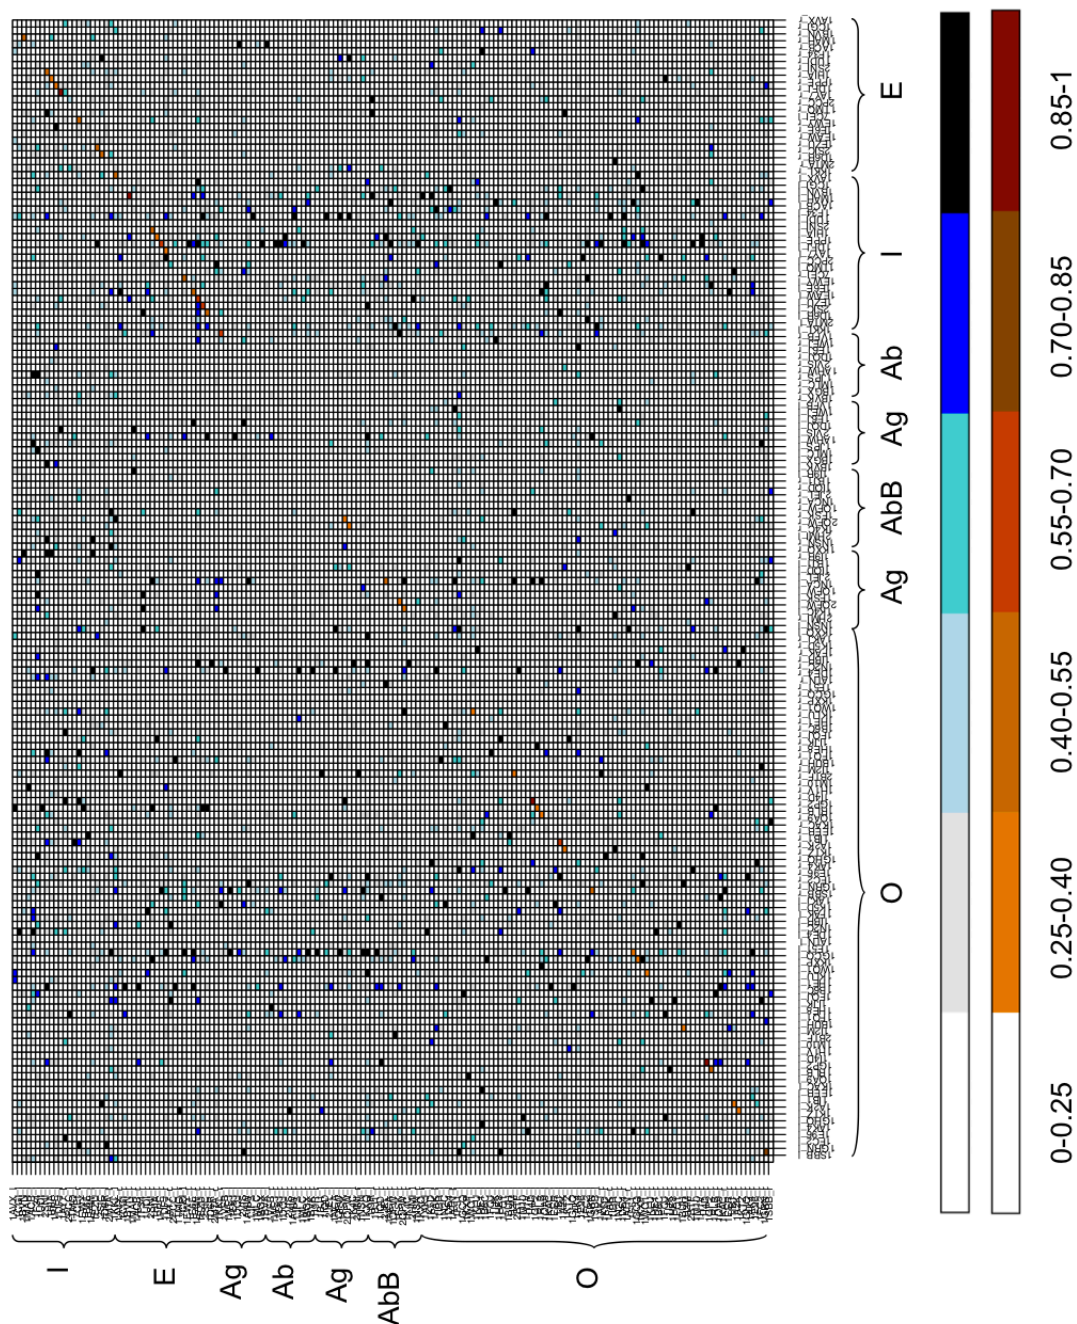

Figure S7: NII matrix for the Mintseris Database 2.0 - predicted interfaces computed over the full conformational space. The matrix is ordered with the true complexes lying on the trailing diagonal. Protein structures labeling columns and rows are grouped in functional classes: Enzymes (E), Inhibitors (I), Antibodies (Ab), Antigens (Ag), Bound Antibodies (AbB), Others (O). Each entry of the matrix corresponds to the NII value computed for the corresponding pair of proteins. Two color scales are used for entries in the matrix (blue tones) and for entries in the trailing diagonal (red tones). High interaction scores (between 0.66 and 1, blue and black/dark red and brown) indicate a high interaction probability. Interaction scores are computed using knowledge of the predicted interfaces. The matrix has AUC=0.61.



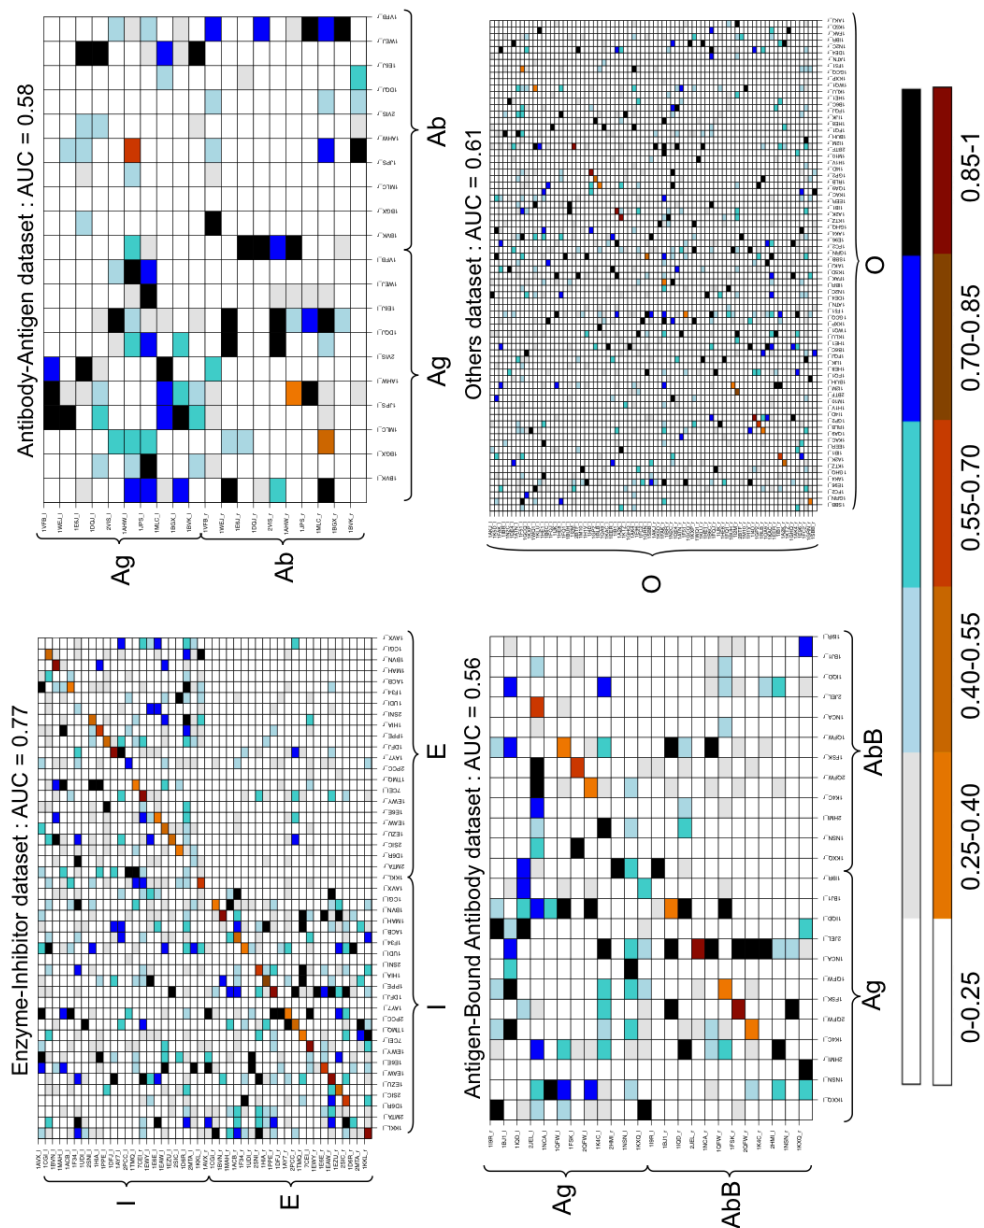

Figure S8: NII matrices for functional classes of proteins - predicted interfaces computed over the full conformational space. Enzyme-Inhibitors (EI; top left), Antibody-Antigen (AbAg; top right), Antigen-Bound Antibody (AgAbB; bottom left), Others (O; bottom right). Matrices are ordered with the true complexes lying on the trailing diagonals and, for each matrix, protein structures are grouped in functional classes. Two color scales are used for entries in the matrix (blue tones) and for entries in the trailing diagonal (red tones). Each entry of a matrix corresponds to the NII value computed for the corresponding pair of proteins. High interaction scores (between 0.66 and 1, blue and black/dark red and brown) indicate a high interaction probability. Interaction scores are computed using knowledge of the predicted interfaces.

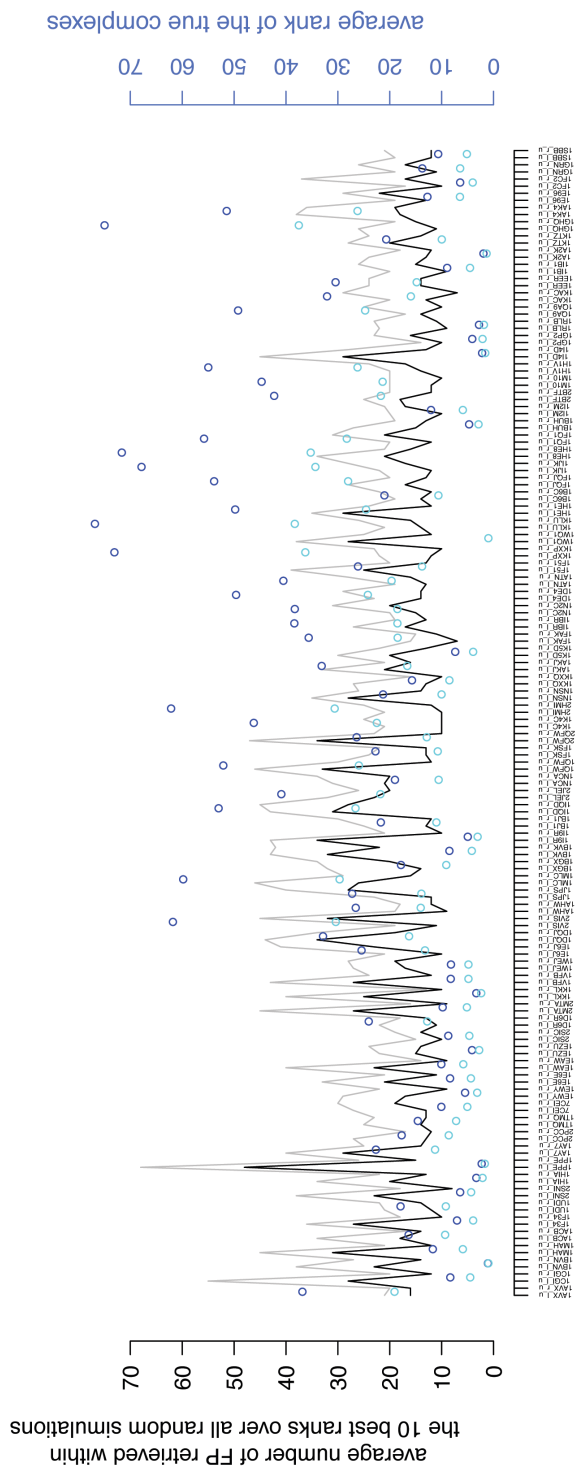

Figure S9: **Average IR for true complexes in the Mintseris Benchmark 2.0 and number of false positives.** The cross docking has been performed on the full conformational space and the IR is computed based on predictions. For each monomer, we plot as false positives (FPs, black curve) the number of partners (excepted the true one) showing an average IR  $\leq 10$ , where the IR is computed over 100 random sets of 20 complexes. The cyan dots indicate the average IR of the true partner over the 100 experiments. The grey curve corresponds to the same experiment run over random sets of 40 complexes and the blue dots to the average IR of the true partners in this second experiment.

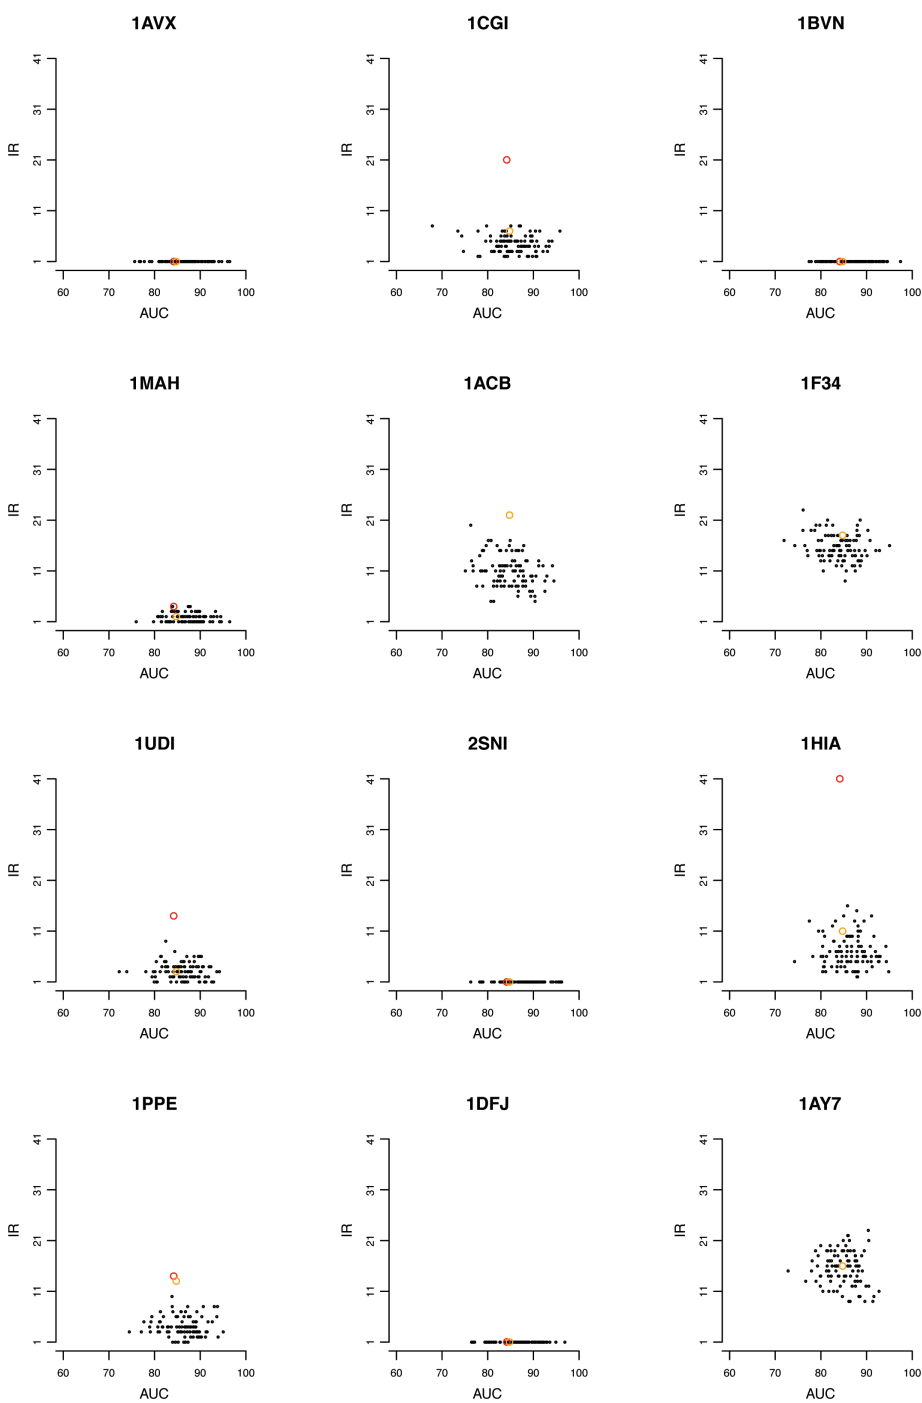

Figure S10: **IR analysis based on experimental interfaces computed over the full conformational space - datasets of 20 complexes randomly chosen in Mintseris Benchmark 2.0.** Each plot corresponds to a complex of the Mintseris Benchmark 2.0. Complexes are organized by functional classes: enzyme-inhibitors (EI, black), antibody-antigenes (AA, dark blue), antibody-bounded antigenes (AbA, light blue), others (O, green). Each colored dot corresponds to the reference complex analyzed with respect to a different random dataset of 40 proteins. Each plot contains 100 black points. The red dot in each plot corresponds to the rank of the complex when evaluated against the 168 proteins of the whole Benchmark Database, and the orange point corresponds to the rank of the complex when evaluated against the set of proteins of the same functional class (EI, AA, AbA, O).

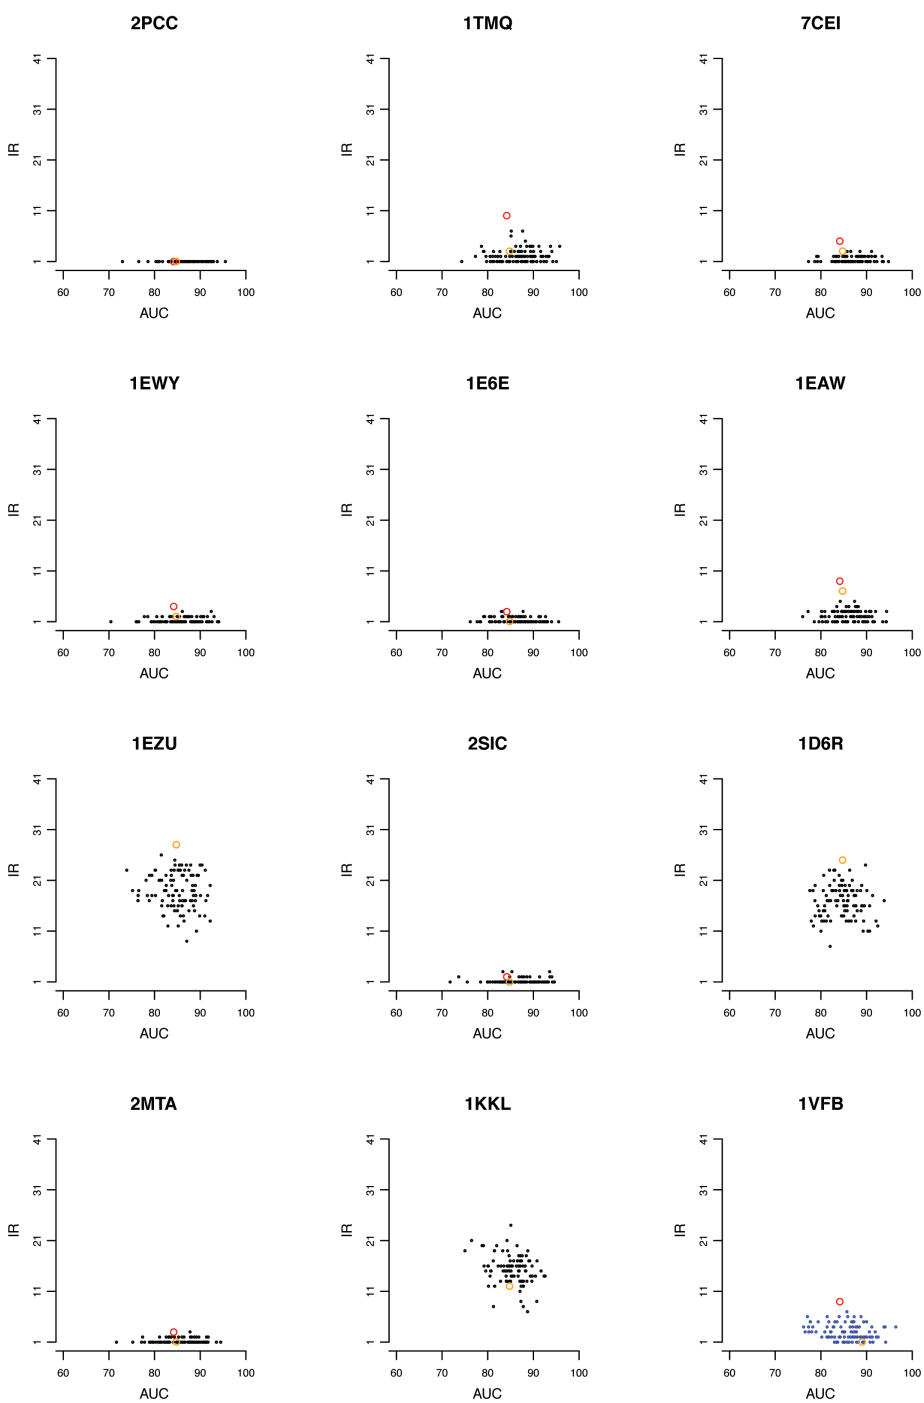

Figure S11: IR analysis based on experimental interfaces computed over the full conformational space - datasets of 20 complexes randomly chosen in Mintseris Benchmark 2.0. See legend in Fig. S10.

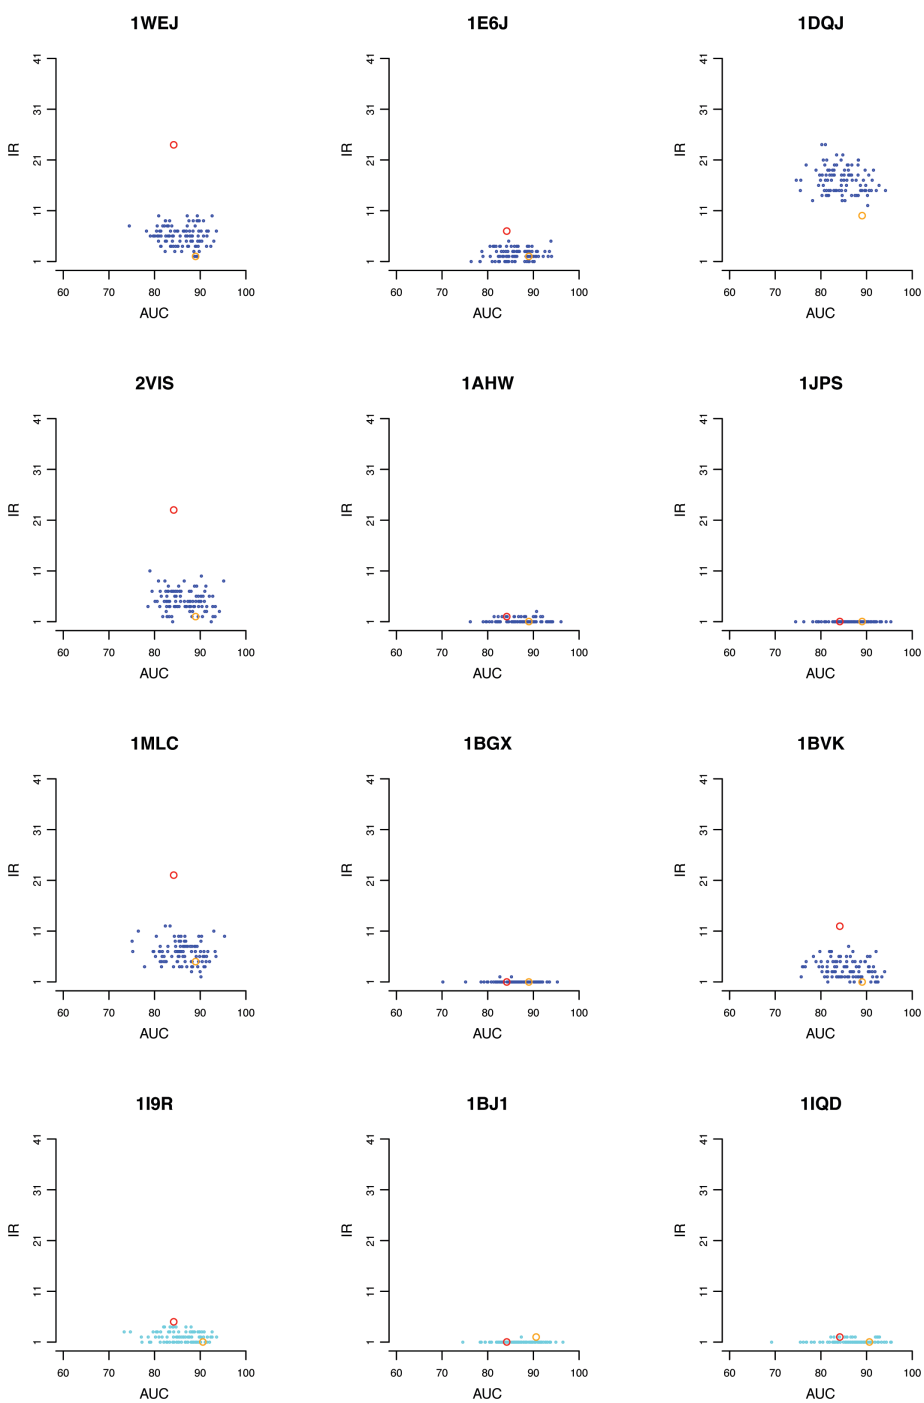

Figure S12: IR analysis based on experimental interfaces computed over the full conformational space - datasets of 20 complexes randomly chosen in Mintseris Benchmark 2.0. See legend in Fig. S10.

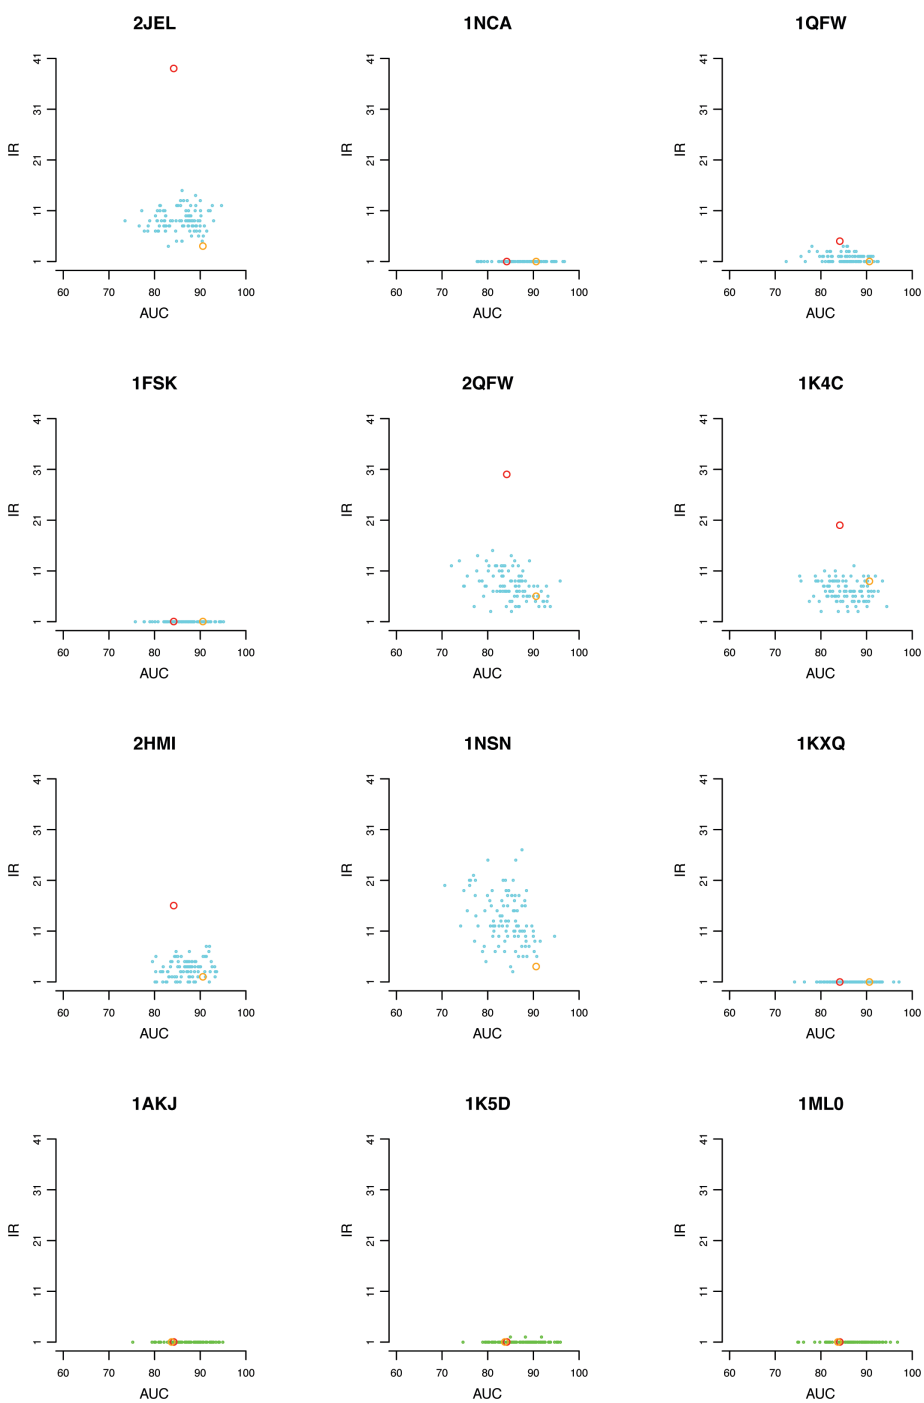

Figure S13: IR analysis based on experimental interfaces computed over the full conformational space - datasets of 20 complexes randomly chosen in Mintseris Benchmark 2.0. See legend in Fig. S10.

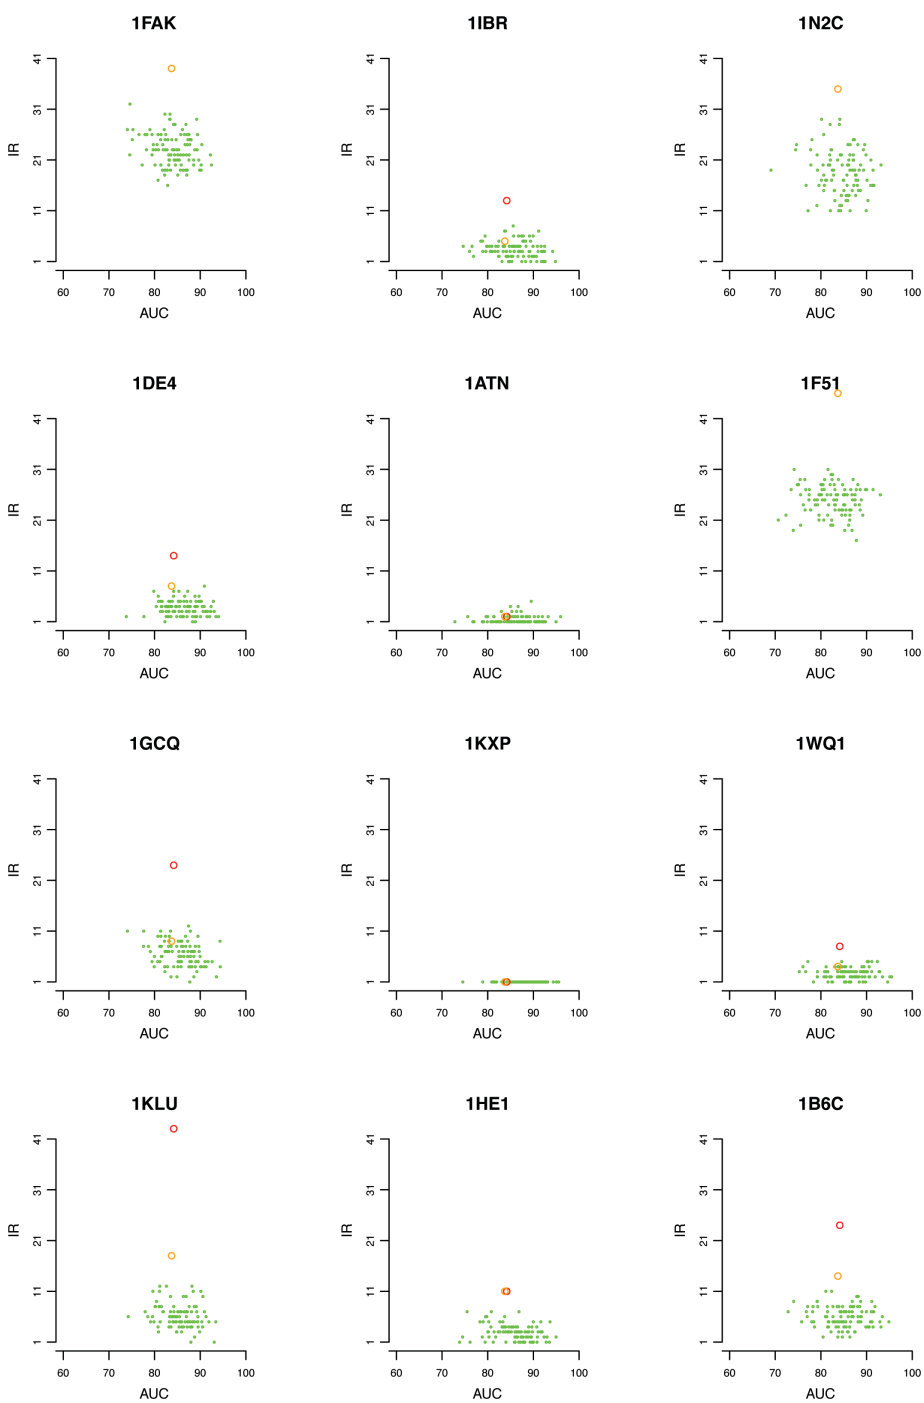

Figure S14: IR analysis based on experimental interfaces computed over the full conformational space - datasets of 20 complexes randomly chosen in Mintseris Benchmark 2.0. See legend in Fig. S10.

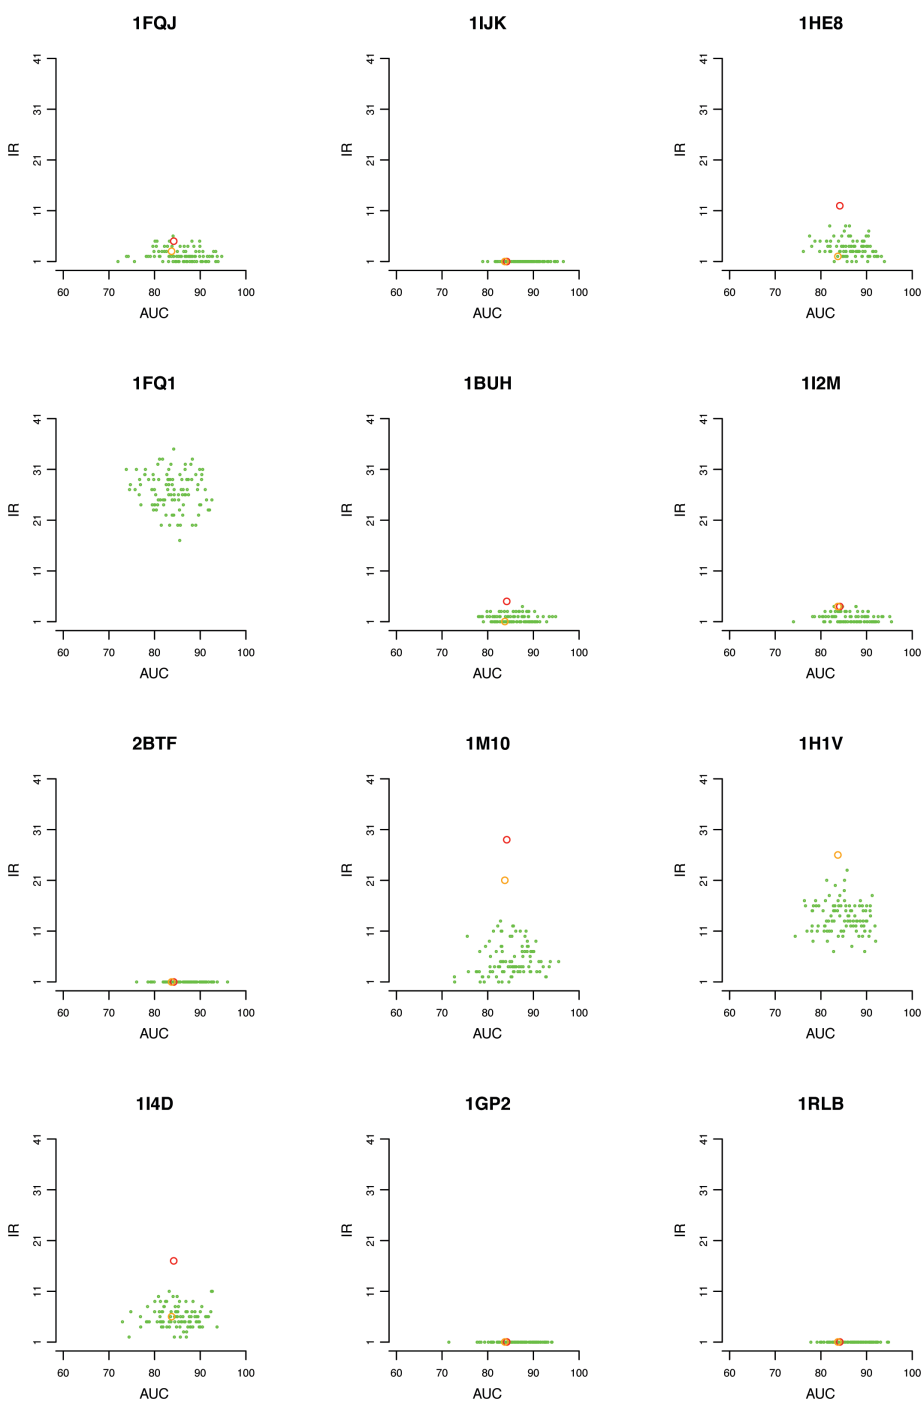

Figure S15: IR analysis based on experimental interfaces computed over the full conformational space - datasets of 20 complexes randomly chosen in Mintseris Benchmark 2.0. See legend in Fig. S10.



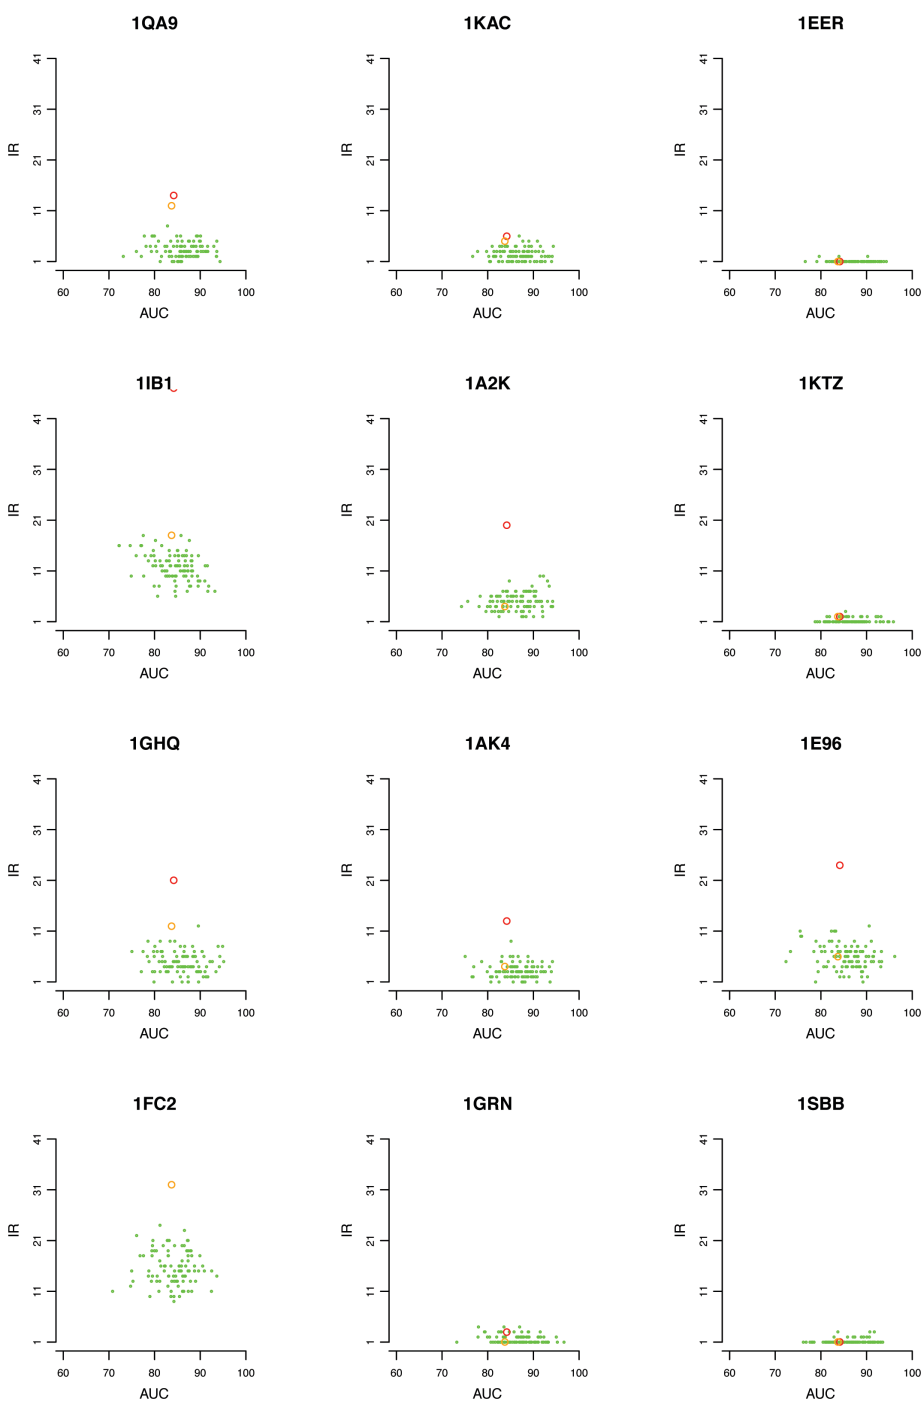

Figure S16: IR analysis based on experimental interfaces computed over the full conformational space - datasets of 20 complexes randomly chosen in Mintseris Benchmark 2.0. See legend in Fig. S10.

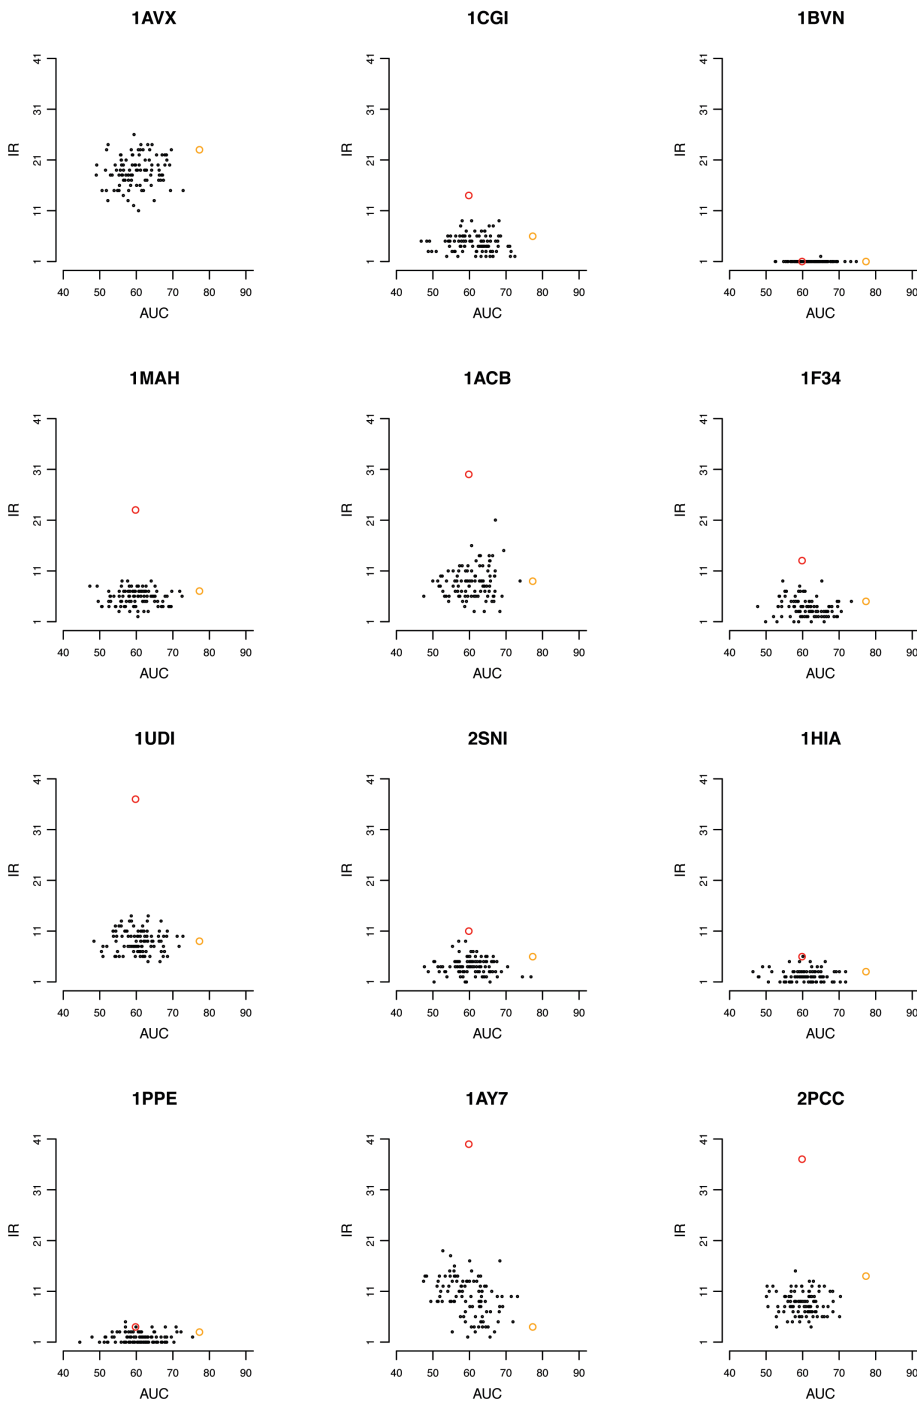

Figure S17: IR analysis based on predicted interfaces computed over the full conformational space - datasets of 20 complexes randomly chosen in Mintseris Benchmark 2.0. Each plot corresponds to a complex of the Mintseris Benchmark 2.0. Complexes are organized by functional classes: enzyme-inhibitors (EI, black), antibody-antigenes (AA, dark blue), antibody-bounded antigenes (AbA, light blue), others (O, green). Each colored dot corresponds to the reference complex analyzed with respect to a different random dataset of 40 proteins. Each plot contains 100 black points. The red dot in each plot corresponds to the rank of the complex when evaluated against the 168 proteins of the whole Benchmark database, and the orange point corresponds to the rank of the complex when evaluated against the set of proteins of the same functional class (EI, AA, AbA, O).

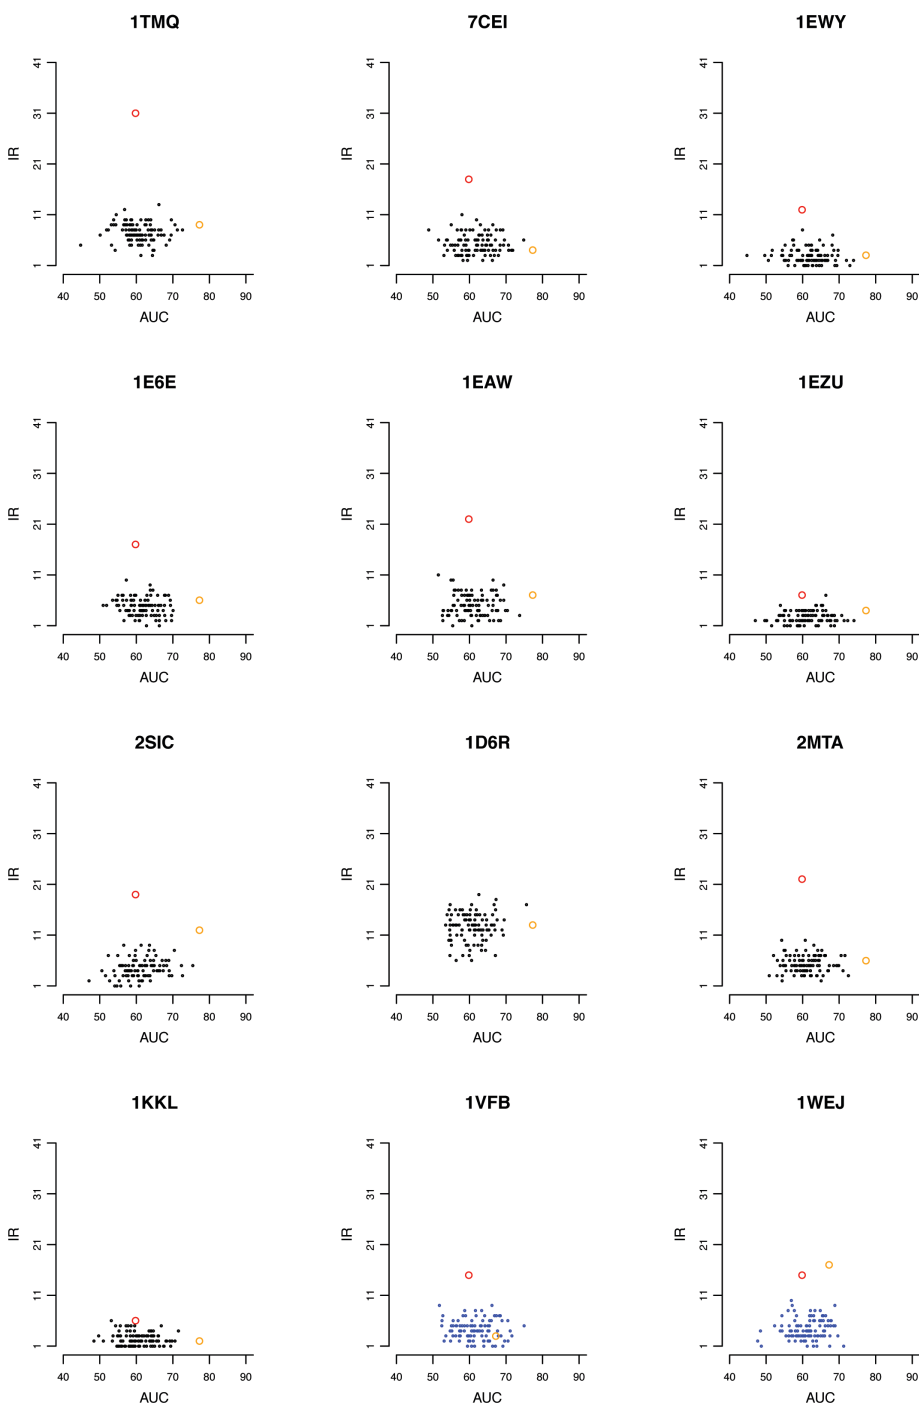

Figure S18: IR analysis based on predicted interfaces computed over the full conformational space - datasets of 20 complexes randomly chosen in Mintseris Benchmark 2.0. See legend in Fig. S17.

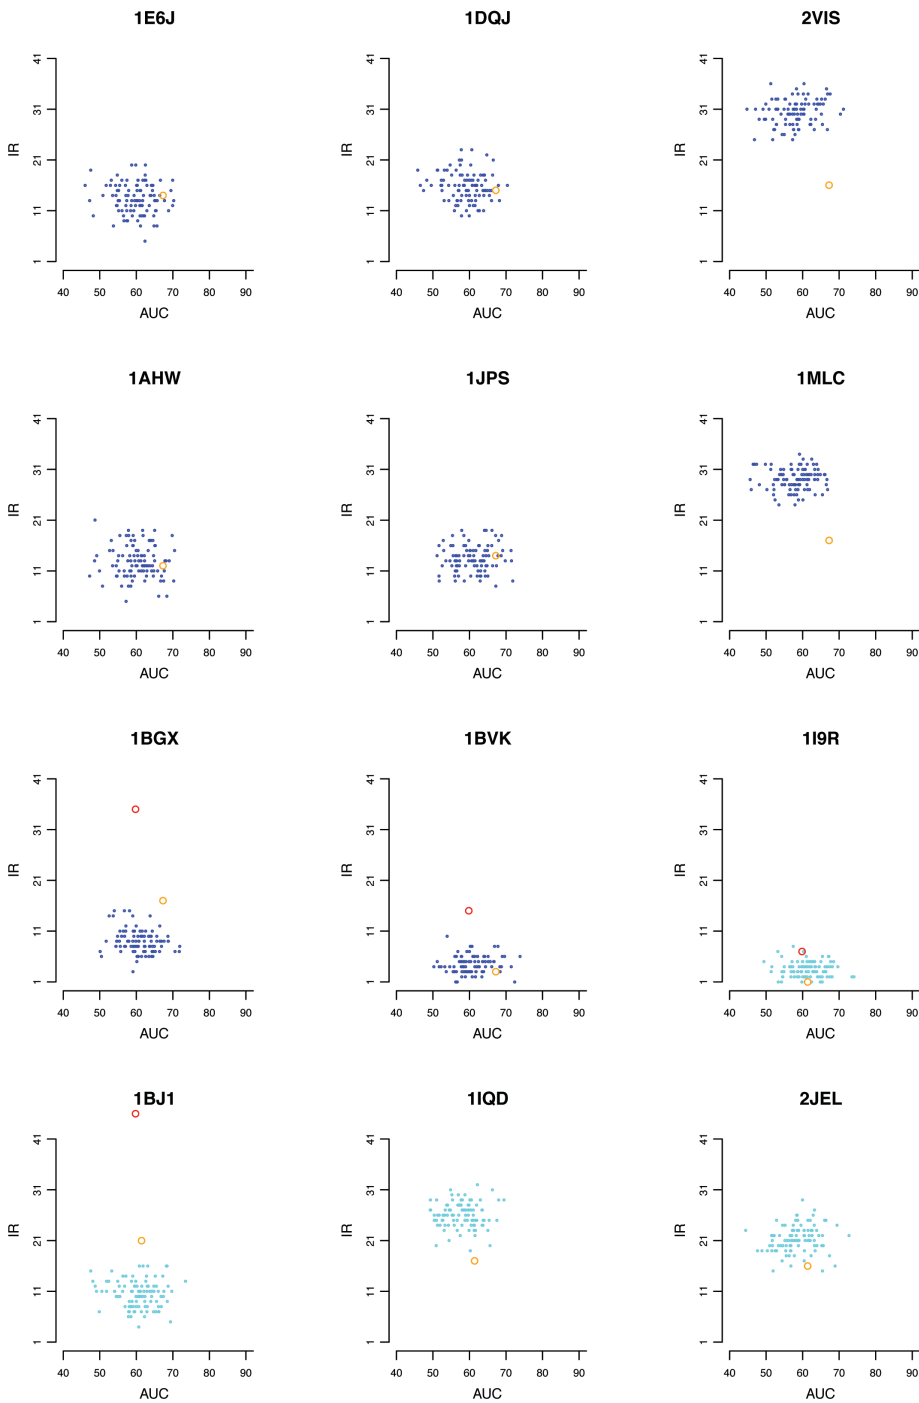

Figure S19: IR analysis based on predicted interfaces computed over the full conformational space - datasets of 20 complexes randomly chosen in Mintseris Benchmark 2.0. See legend in Fig. S17.

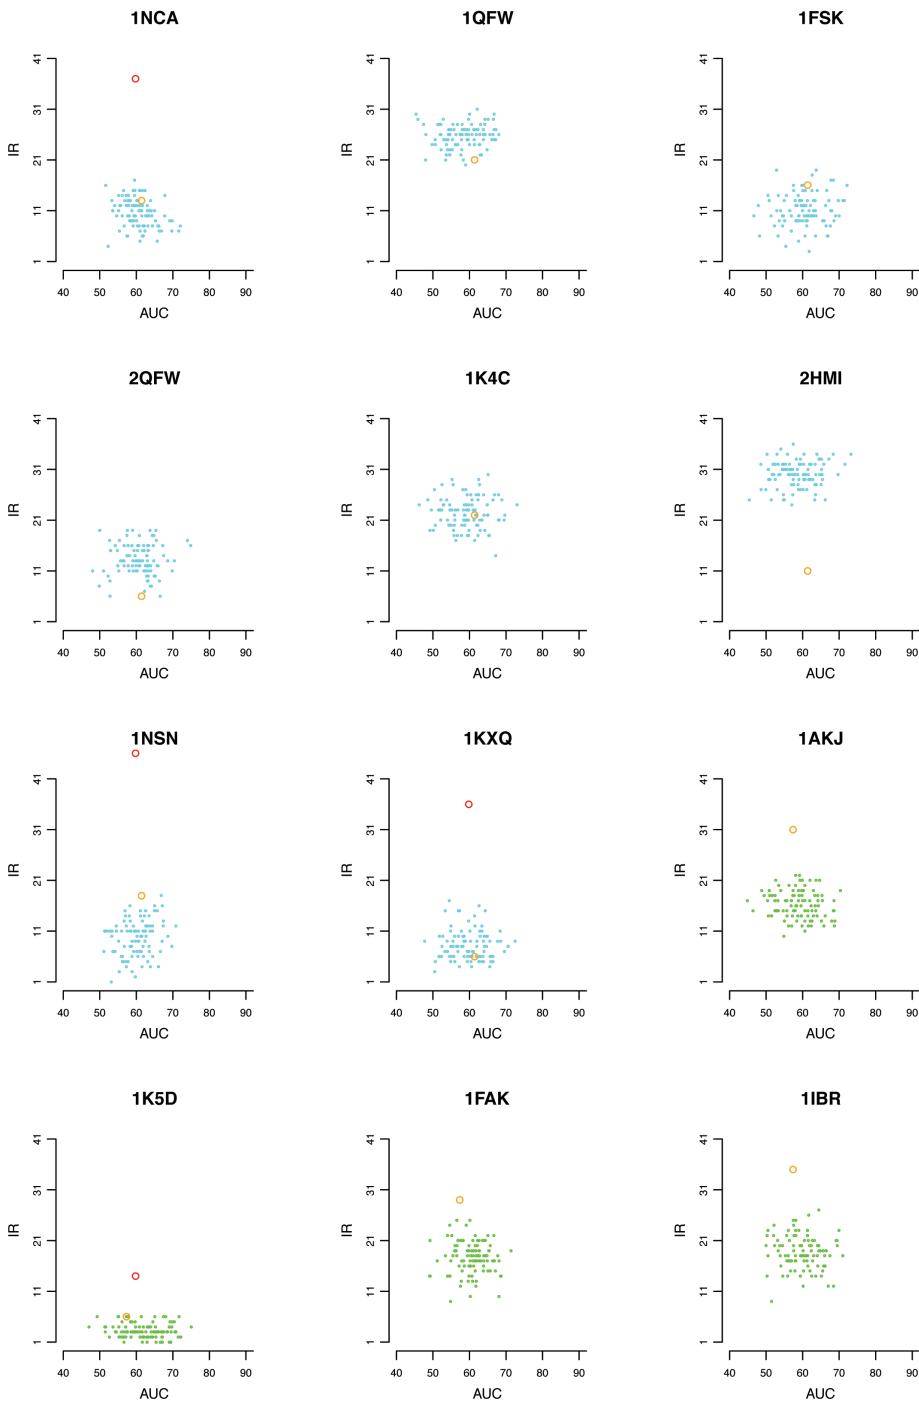

Figure S20: IR analysis based on predicted interfaces computed over the full conformational space - datasets of 20 complexes randomly chosen in Mintseris Benchmark 2.0. See legend in Fig. S17.

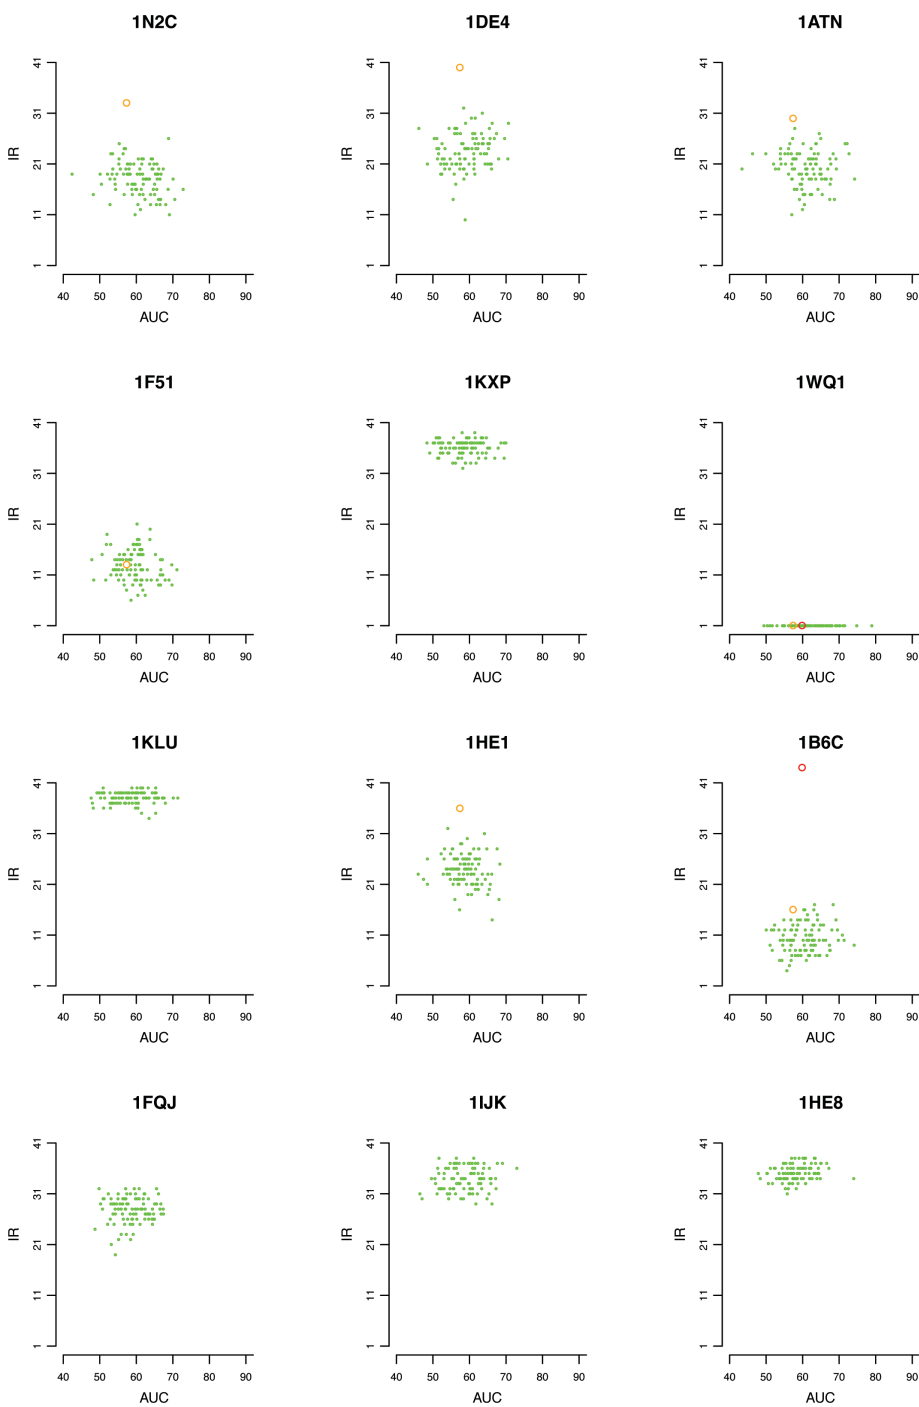

Figure S21: IR analysis based on predicted interfaces computed over the full conformational space - datasets of 20 complexes randomly chosen in Mintseris Benchmark 2.0. See legend in Fig. S17.

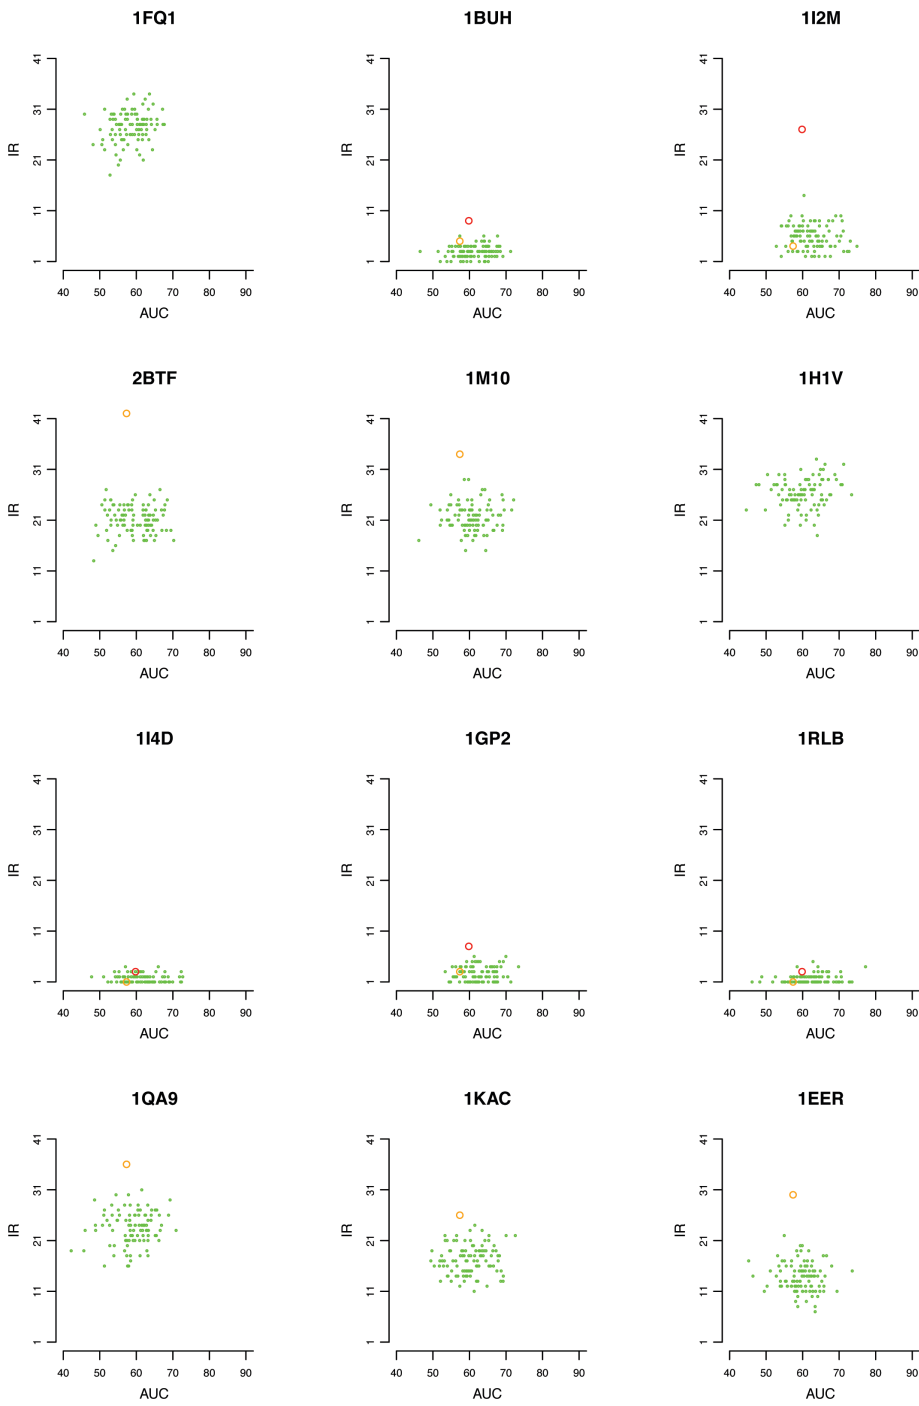

Figure S22: IR analysis based on predicted interfaces computed over the full conformational space - datasets of 20 complexes randomly chosen in Mintseris Benchmark 2.0. See legend in Fig. S17.

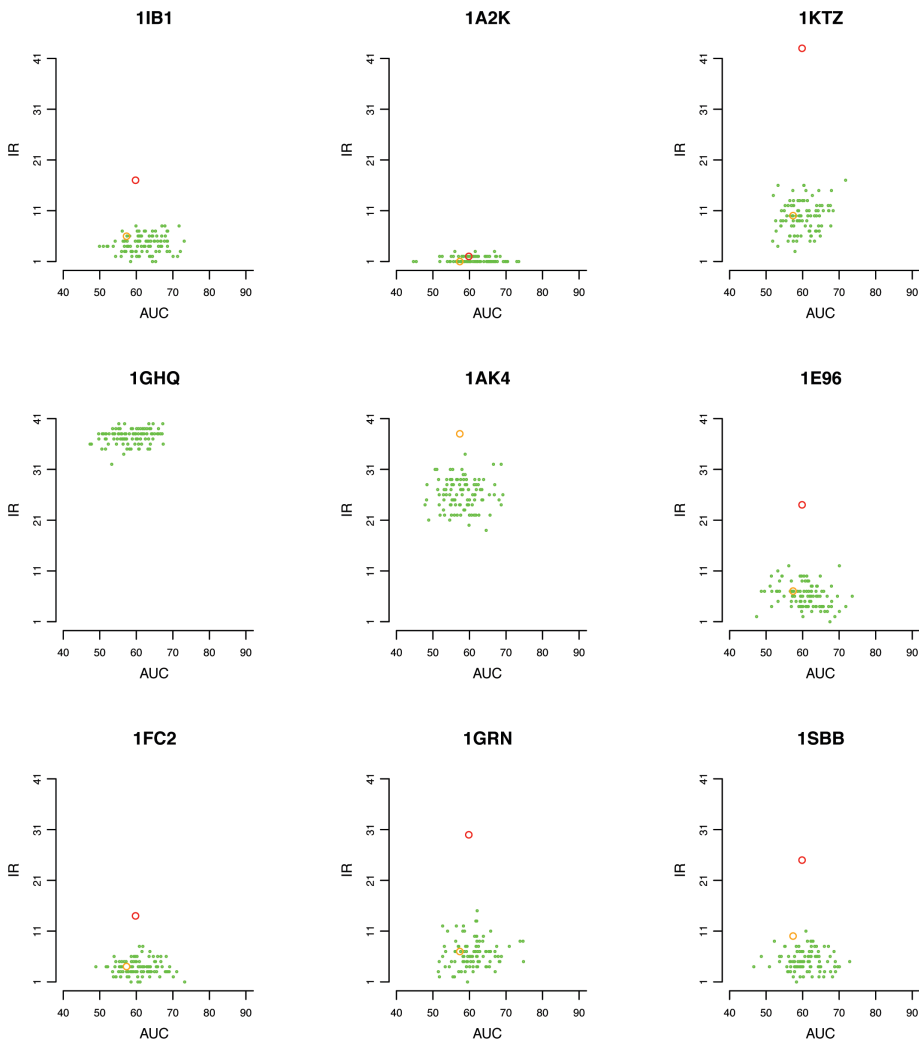

Figure S23: IR analysis based on predicted interfaces computed over the full conformational space - datasets of 20 complexes randomly chosen in Mintseris Benchmark 2.0. See legend in Fig. S17.



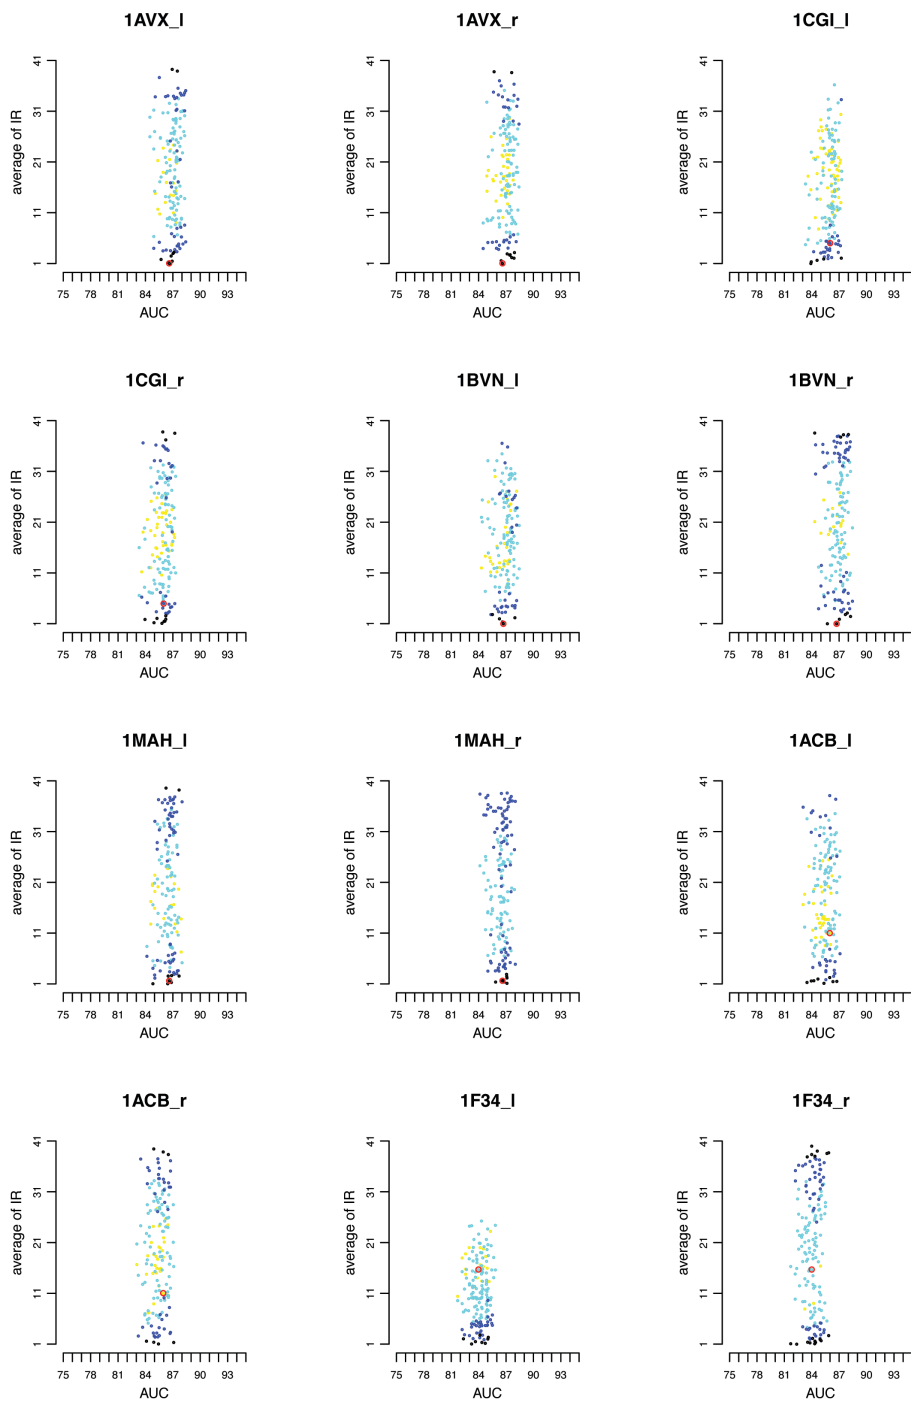

Figure S24: **IR analysis of false complexes against the true one, based on experimental interfaces and the full exploration of the conformational space.** Each monomer of the Mintseris Benchmark 2.0 is coupled with one of the 168 proteins (including the monomer itself) of the dataset forming either a false (167 cases) or the true complex. For each complex, we computed the corresponding average IR and average AUC over 100 random sets of 40 proteins. These values are reported as a point in a plot. Each plot contains 168 points. The red circle in each plot corresponds to the values of the true complex. Dots are colored in a scale from black, blue, cyan, yellow. A color corresponds to the value of the standard deviation  $\sigma$  of the distribution of 100 IRs computed for a complex: black if  $\sigma \leq 1$ , blue if  $\sigma \leq 2$ , cyan if  $\sigma \leq 3$  and yellow otherwise (i.e.  $\sigma > 3$ ).

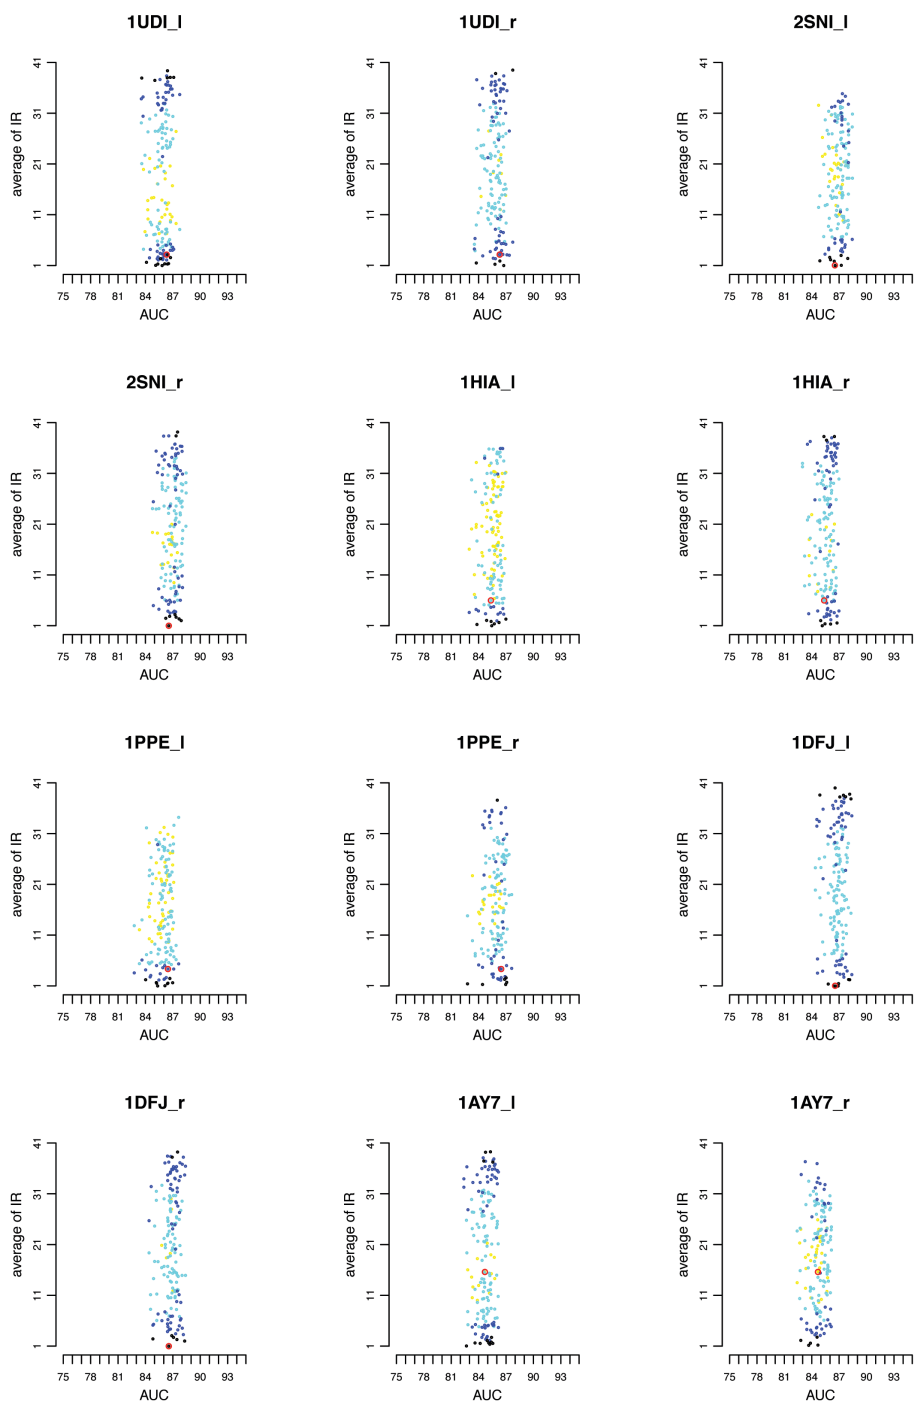

Figure S25: IR analysis of false complexes against the true one, based on experimental interfaces computed over the full conformational space. See legend in Fig. S24.

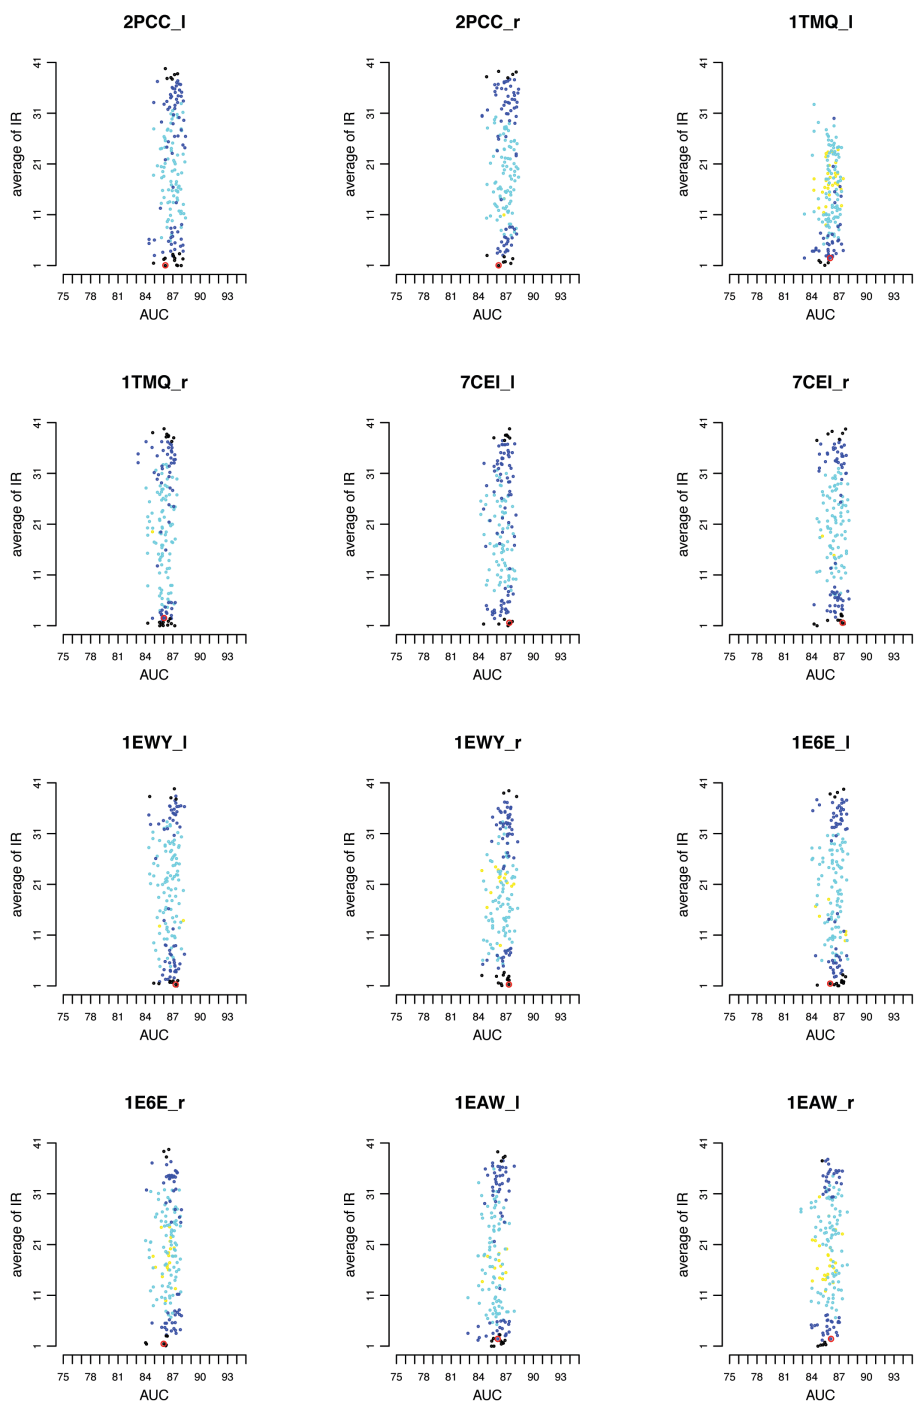

Figure S26: IR analysis of false complexes against the true one, based on experimental interfaces computed over the full conformational space. See legend in Fig. S24.

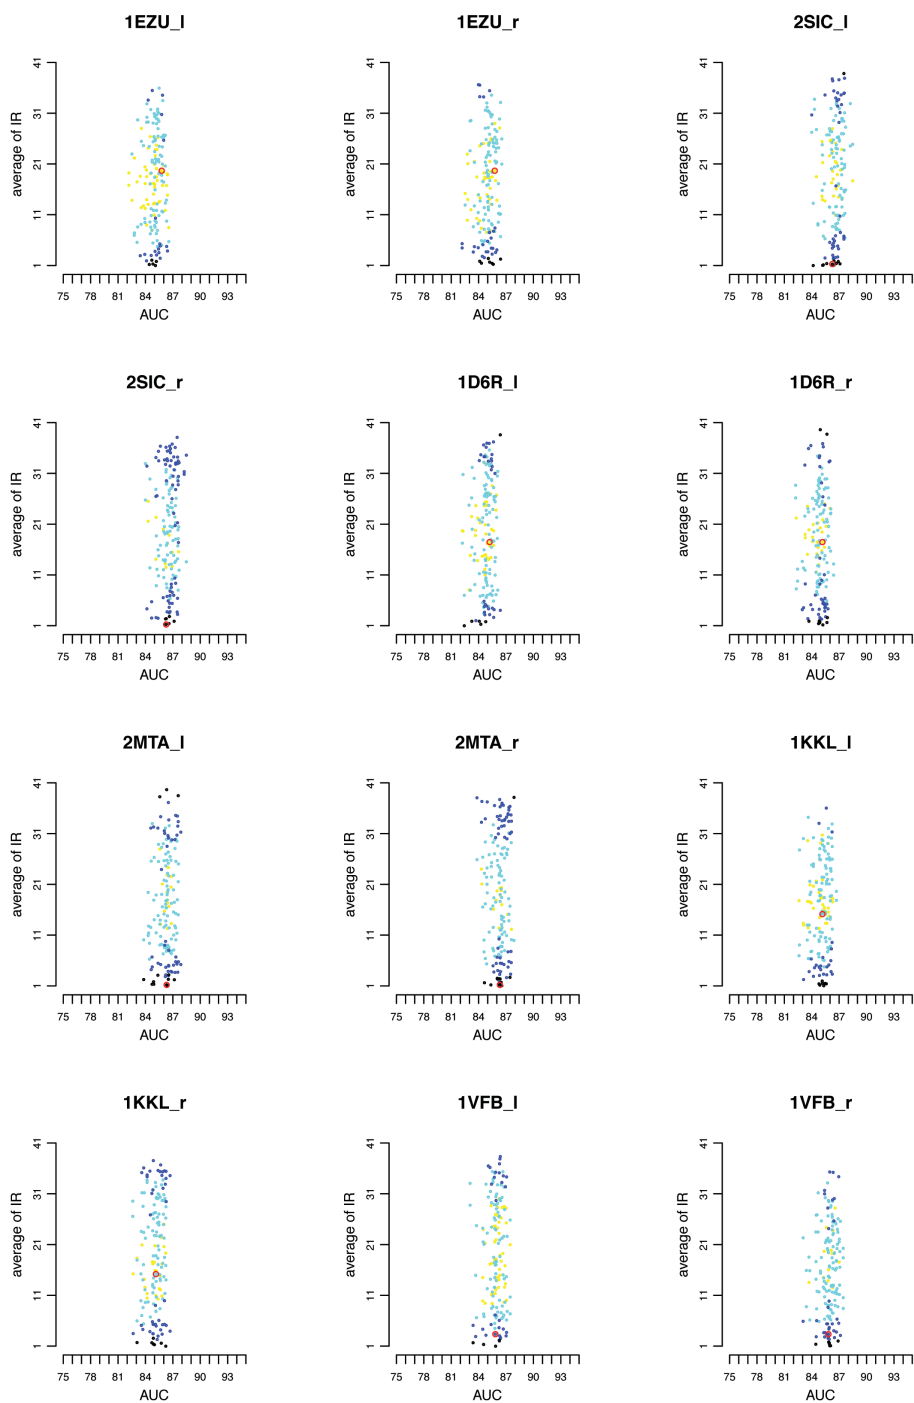

Figure S27: IR analysis of false complexes against the true one, based on experimental interfaces computed over the full conformational space. See legend in Fig. S24.

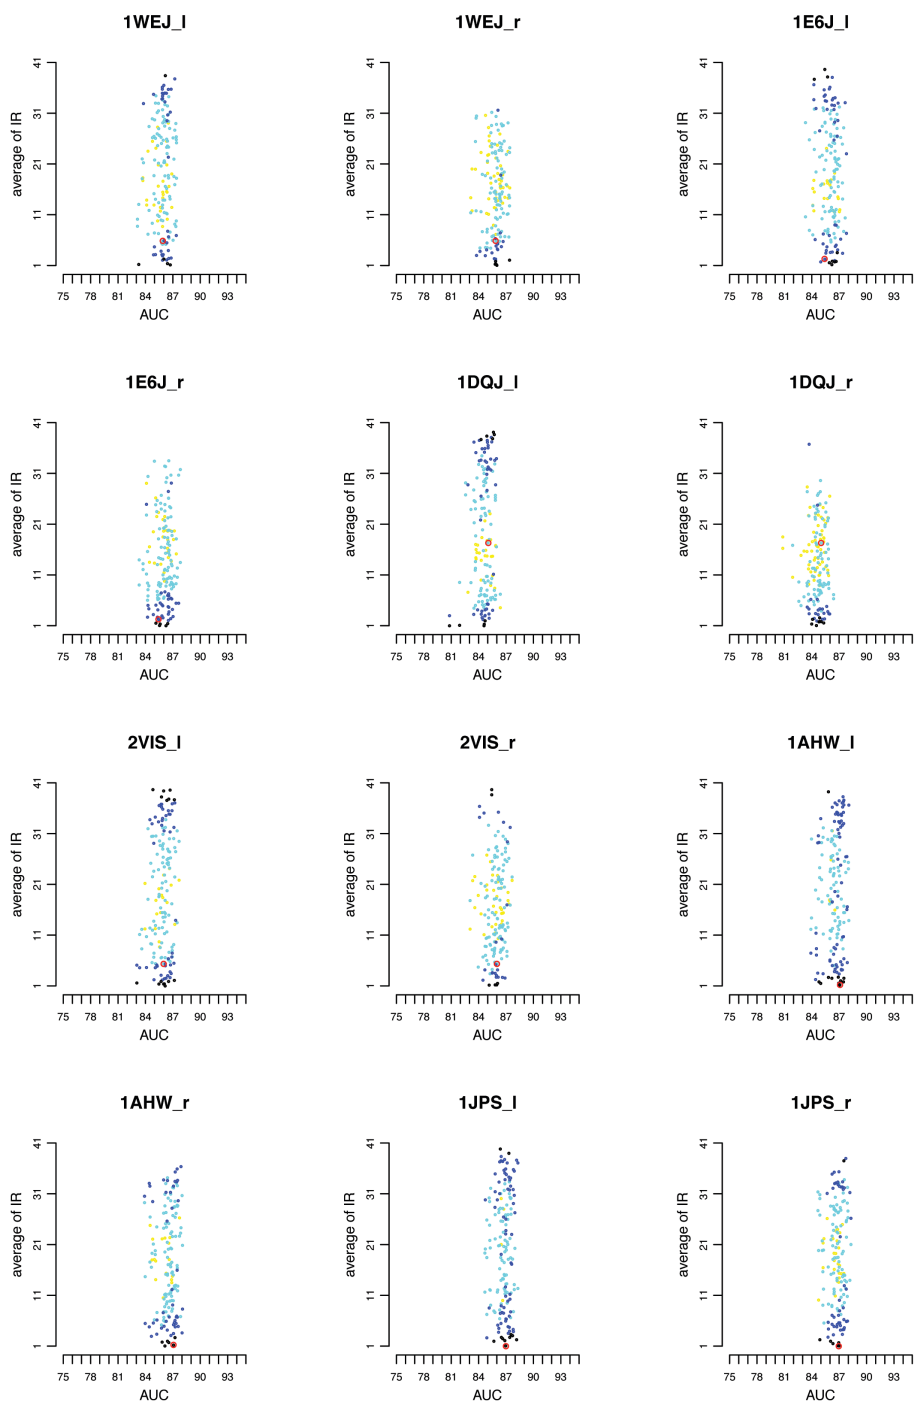

Figure S28: IR analysis of false complexes against the true one, based on experimental interfaces computed over the full conformational space. See legend in Fig. S24.

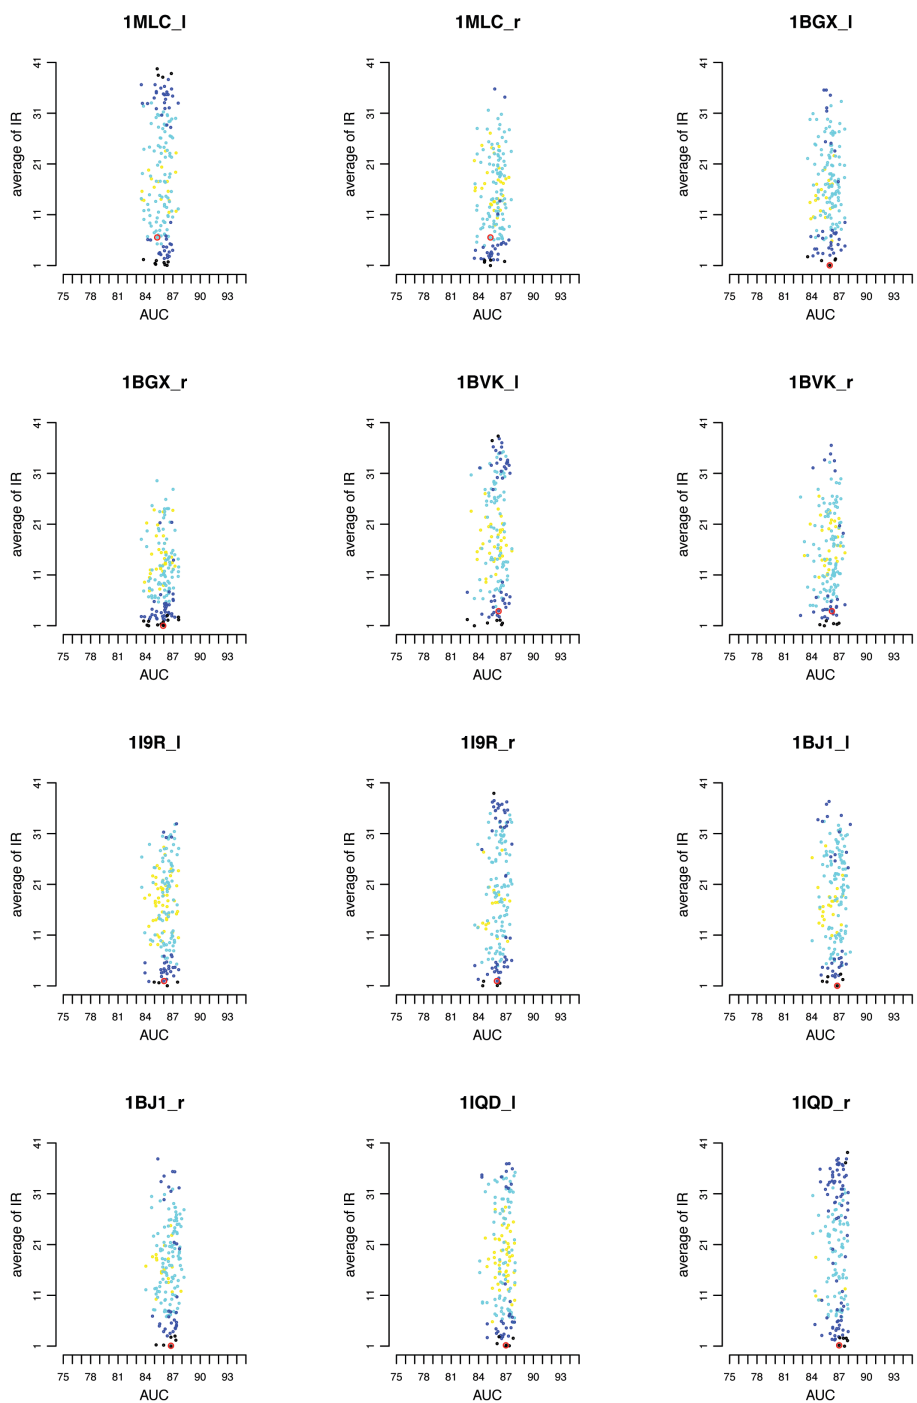

Figure S29: IR analysis of false complexes against the true one, based on experimental interfaces computed over the full conformational space. See legend in Fig. S24.

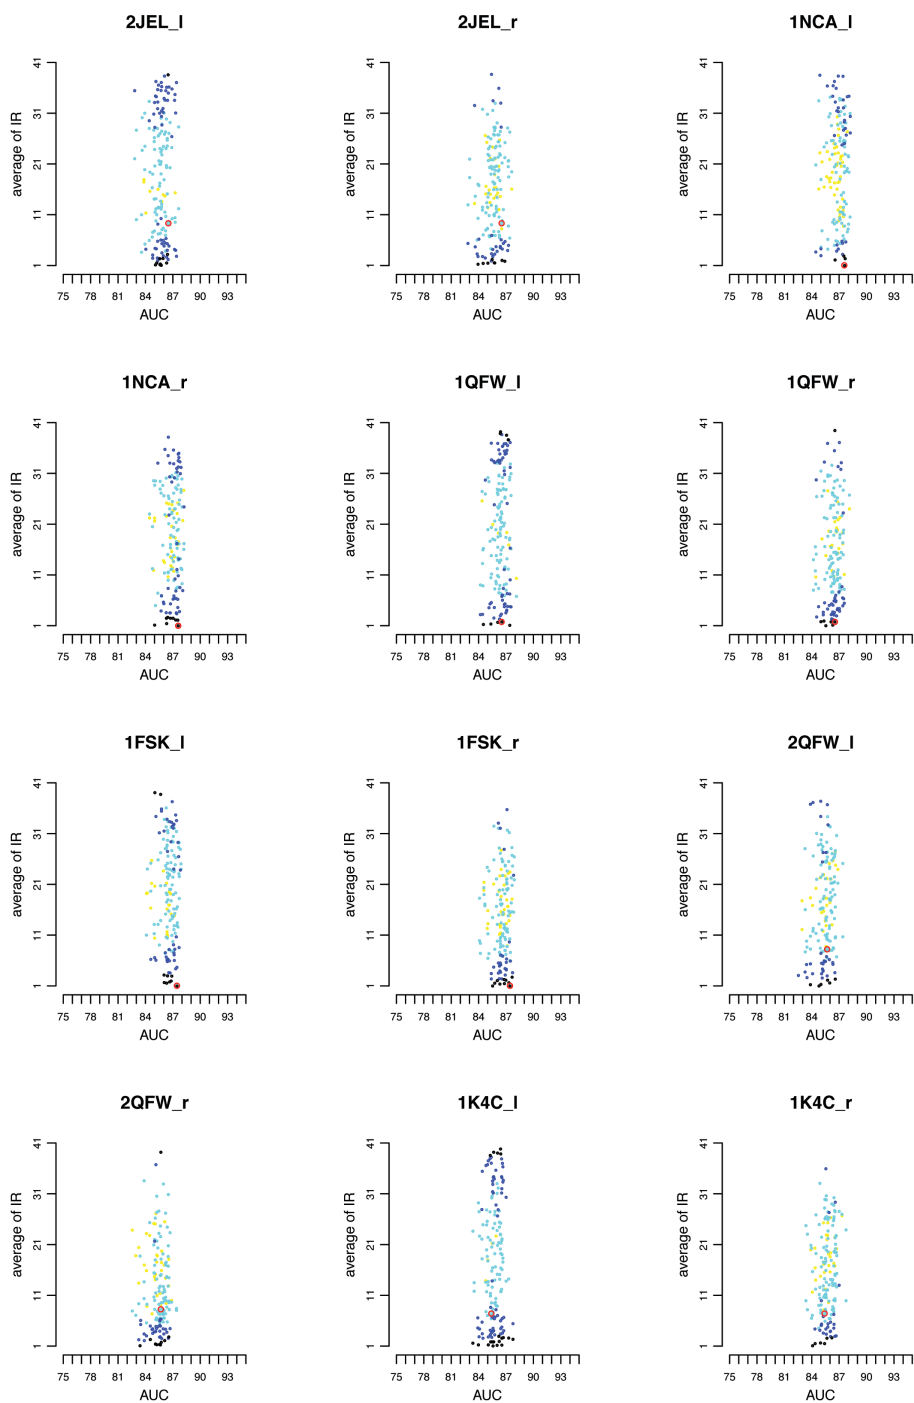

Figure S30: IR analysis of false complexes against the true one, based on experimental interfaces computed over the full conformational space. See legend in Fig. S24.

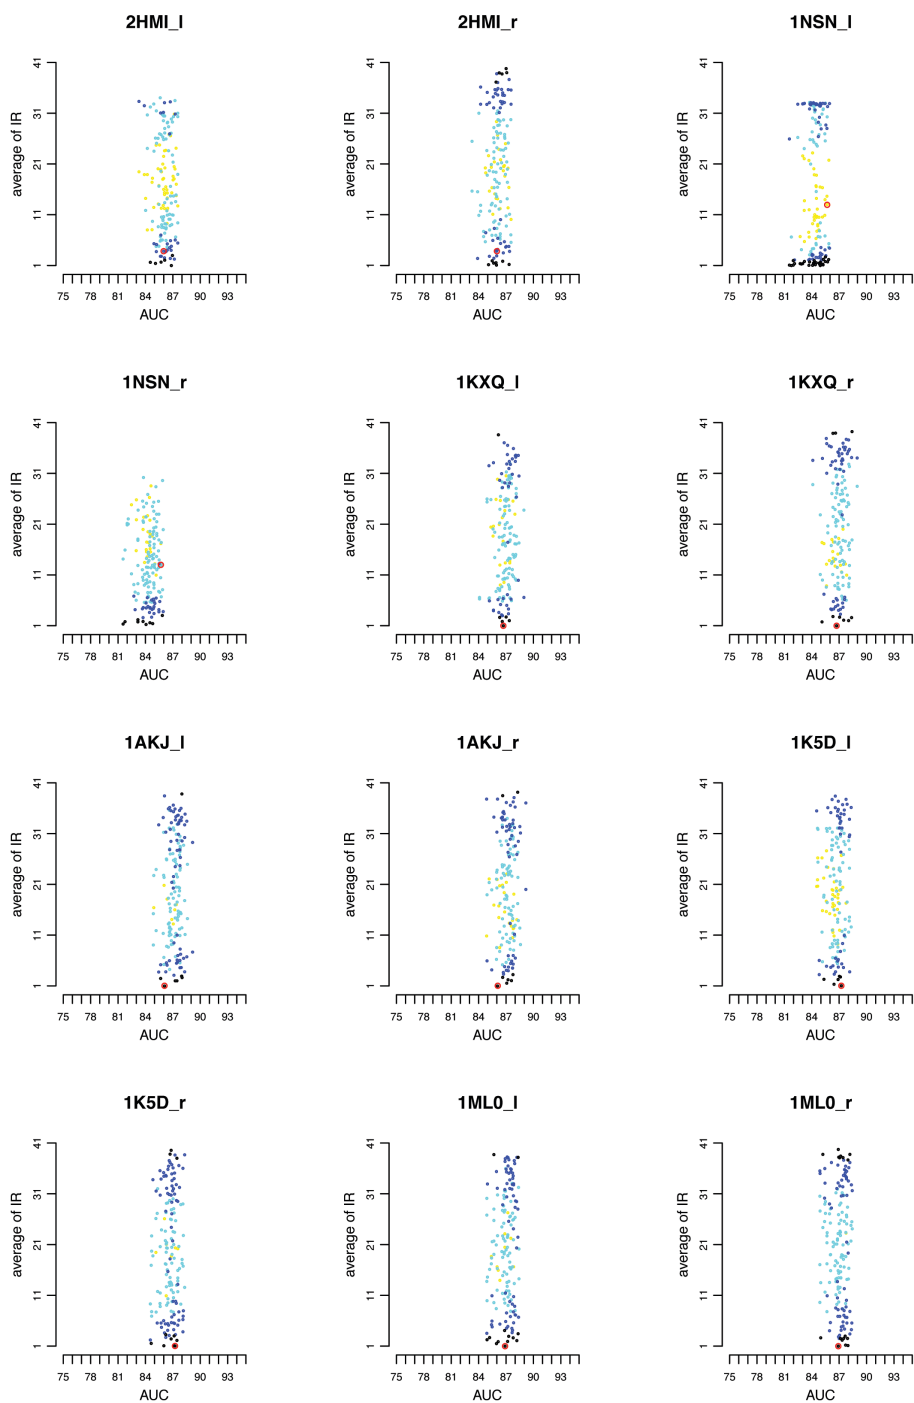

Figure S31: IR analysis of false complexes against the true one, based on experimental interfaces computed over the full conformational space. See legend in Fig. S24.



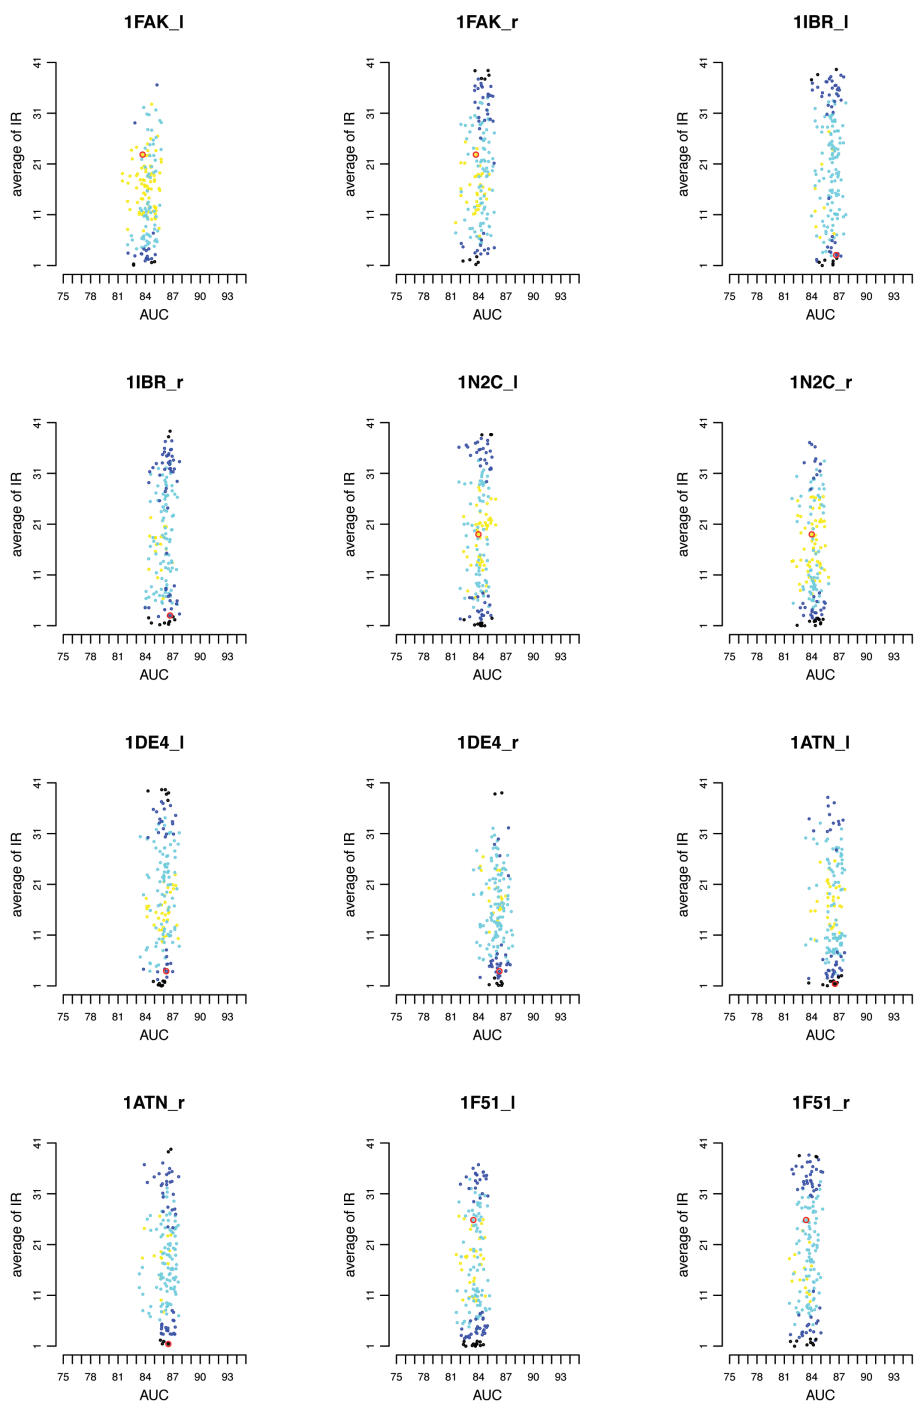

Figure S32: IR analysis of false complexes against the true one, based on experimental interfaces computed over the full conformational space. See legend in Fig. S24.

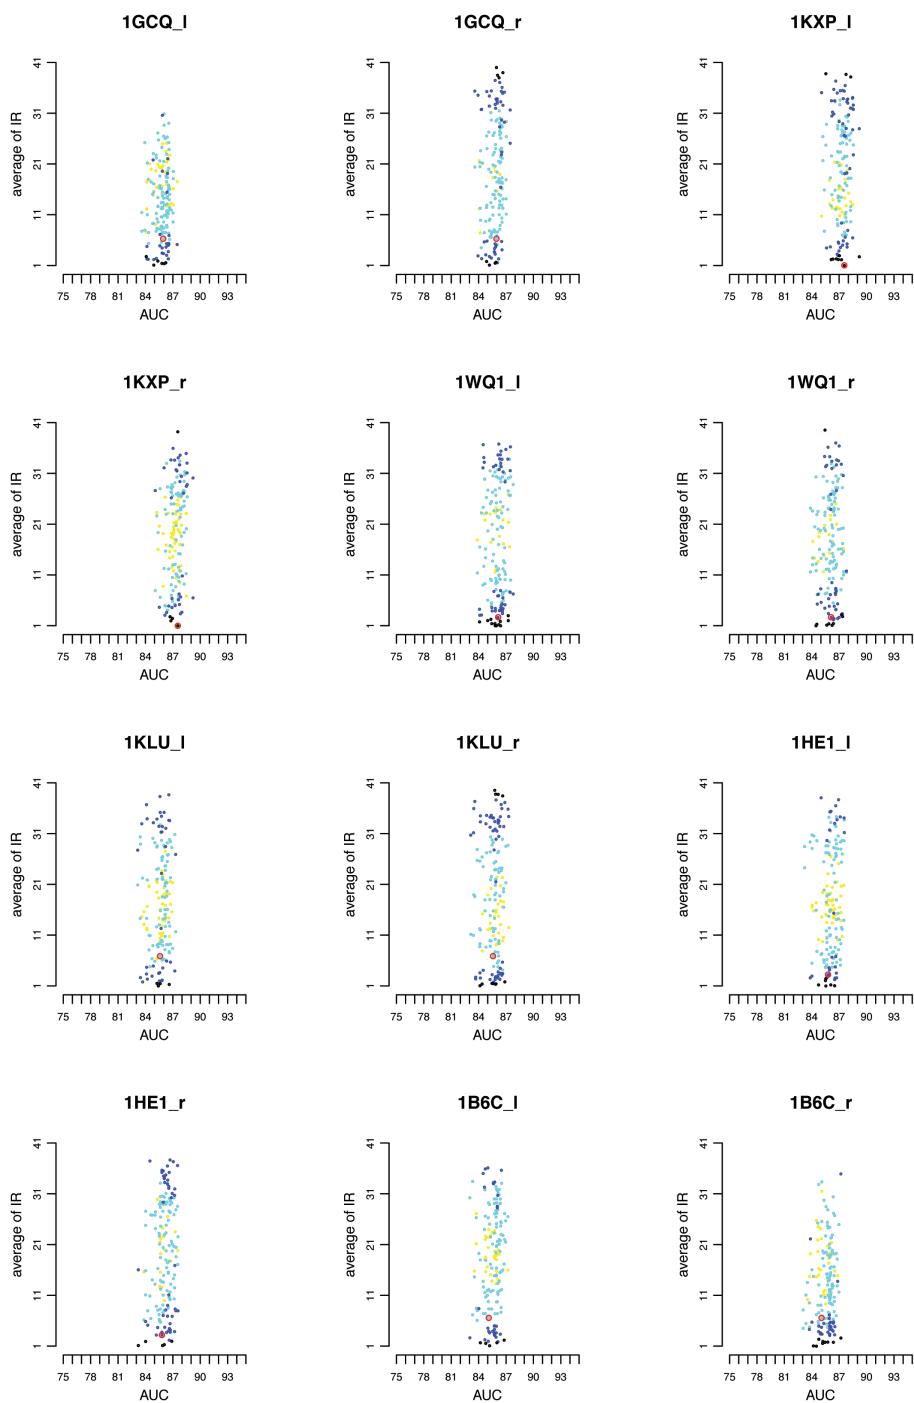

Figure S33: IR analysis of false complexes against the true one, based on experimental interfaces computed over the full conformational space. See legend in Fig. S24.

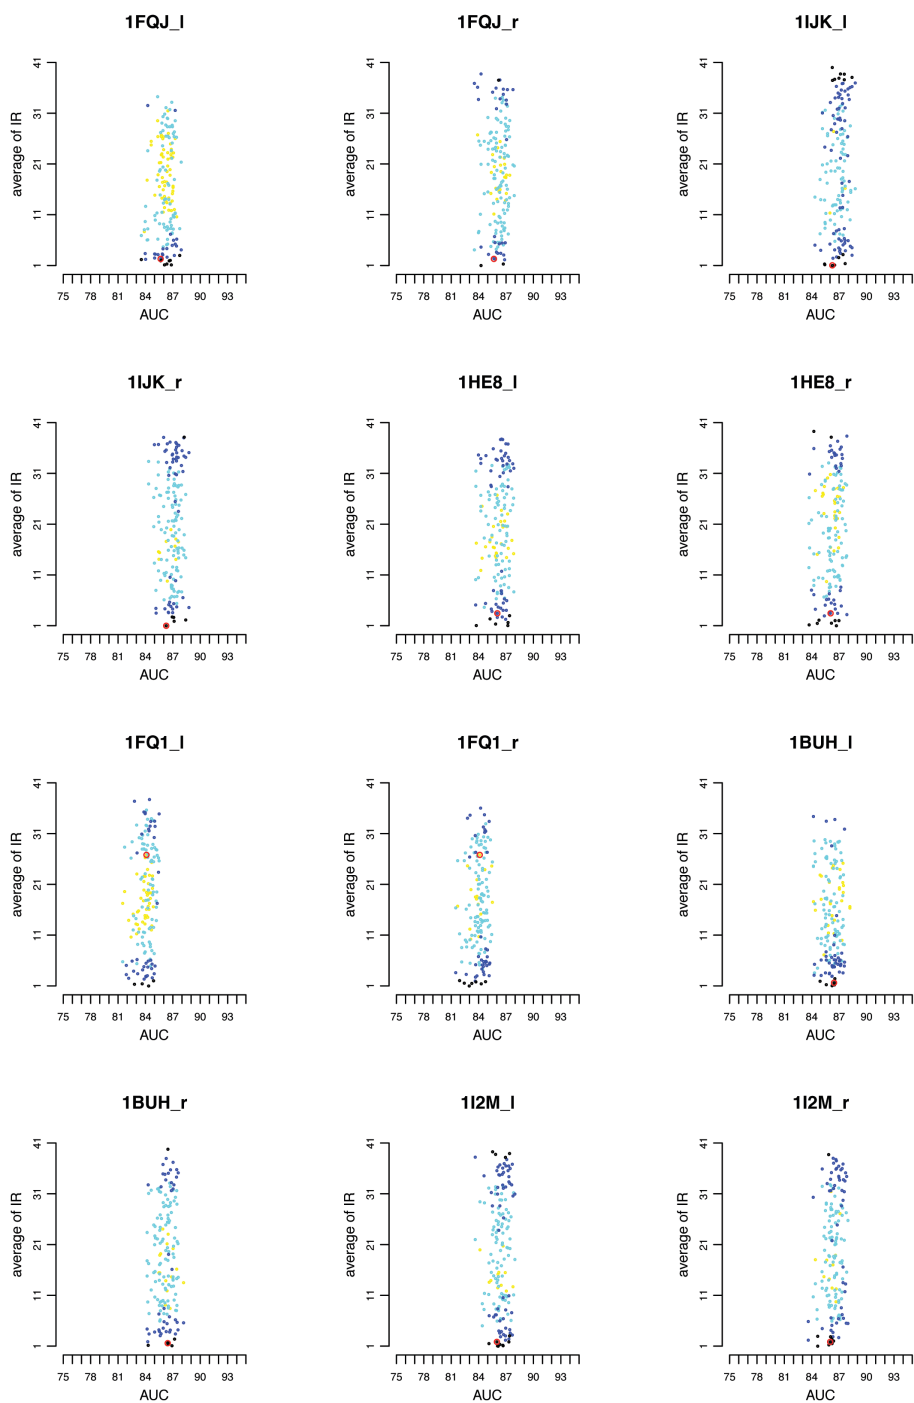

Figure S34: IR analysis of false complexes against the true one, based on experimental interfaces computed over the full conformational space. See legend in Fig. S24.

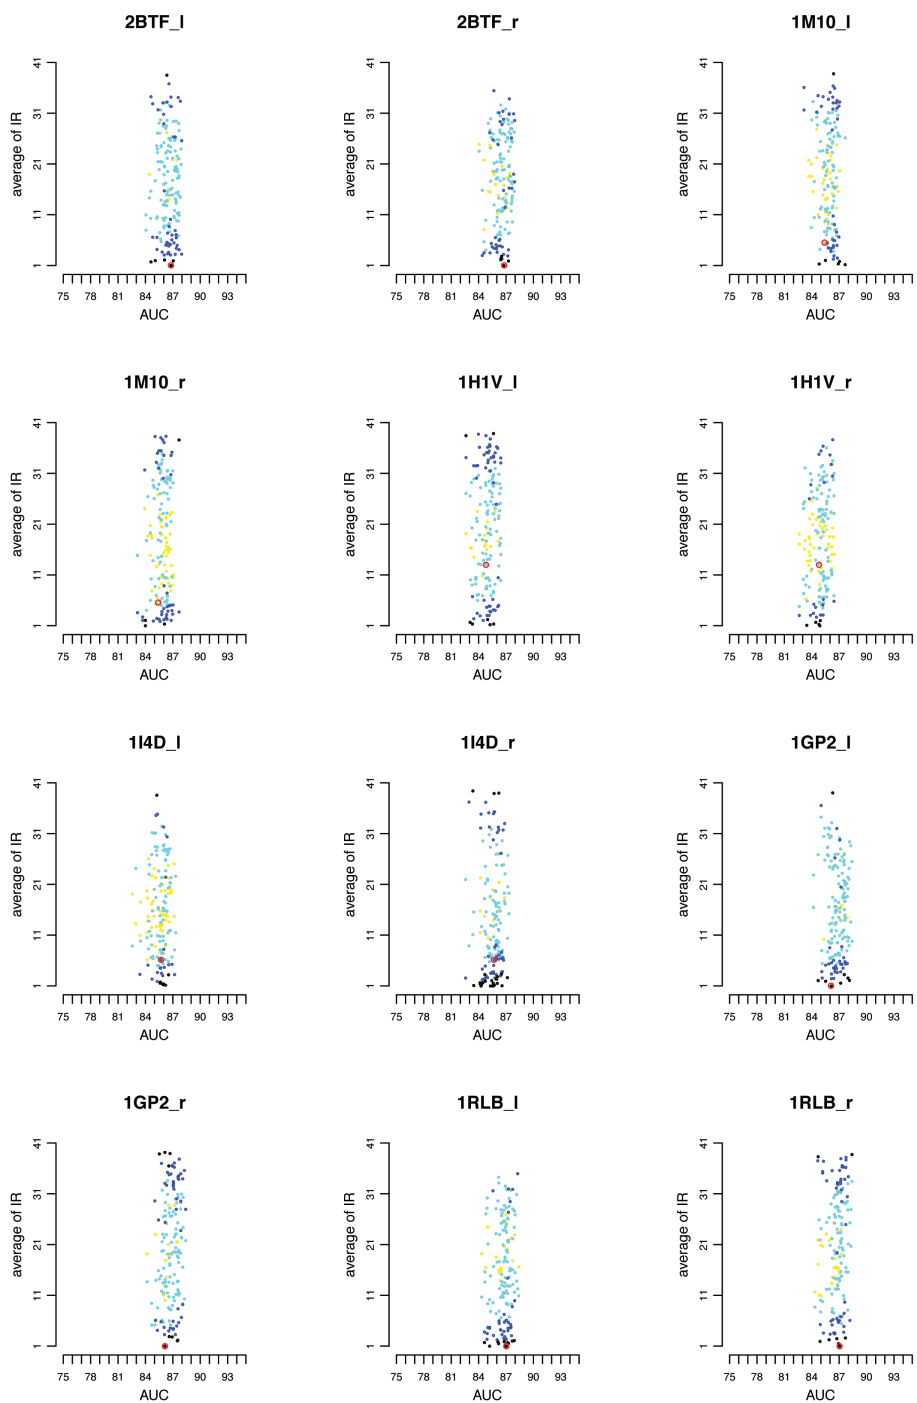

Figure S35: IR analysis of false complexes against the true one, based on experimental interfaces computed over the full conformational space. See legend in Fig. S24.

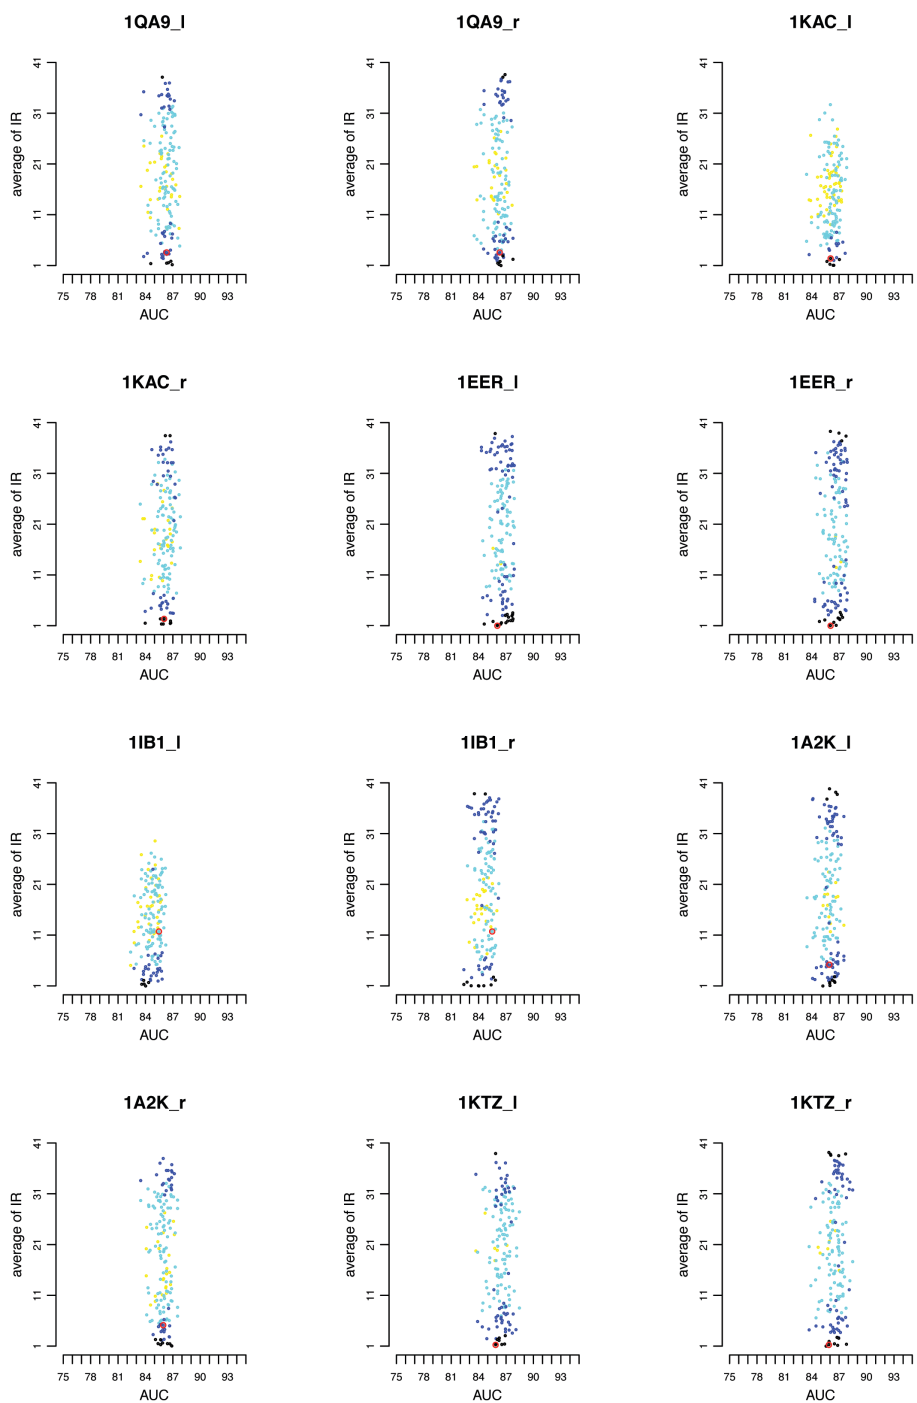

Figure S36: IR analysis of false complexes against the true one, based on experimental interfaces computed over the full conformational space. See legend in Fig. S24.

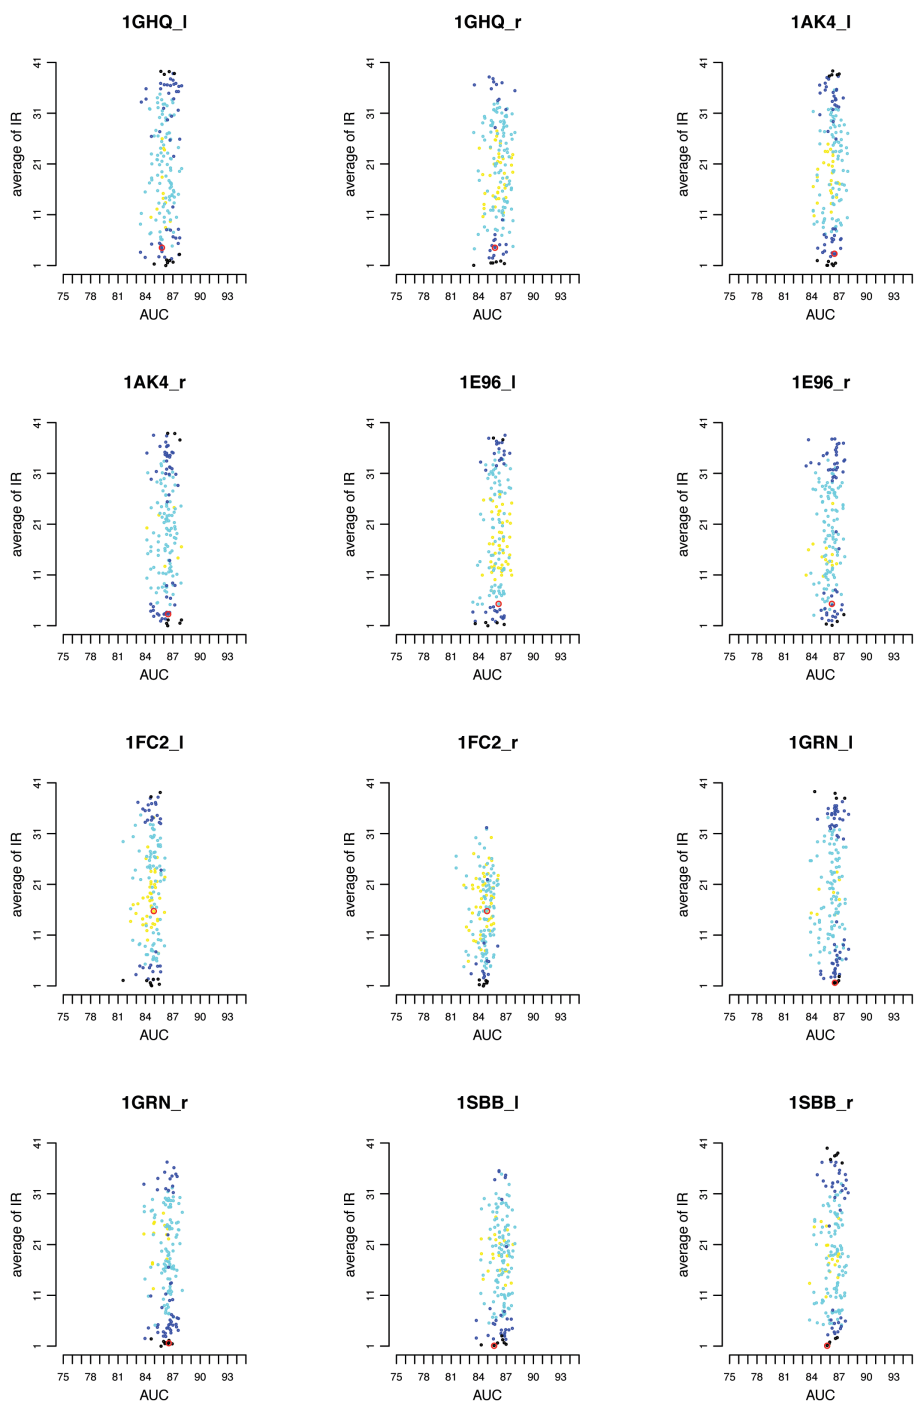

Figure S37: IR analysis of false complexes against the true one, based on experimental interfaces computed over the full conformational space. See legend in Fig. S24.

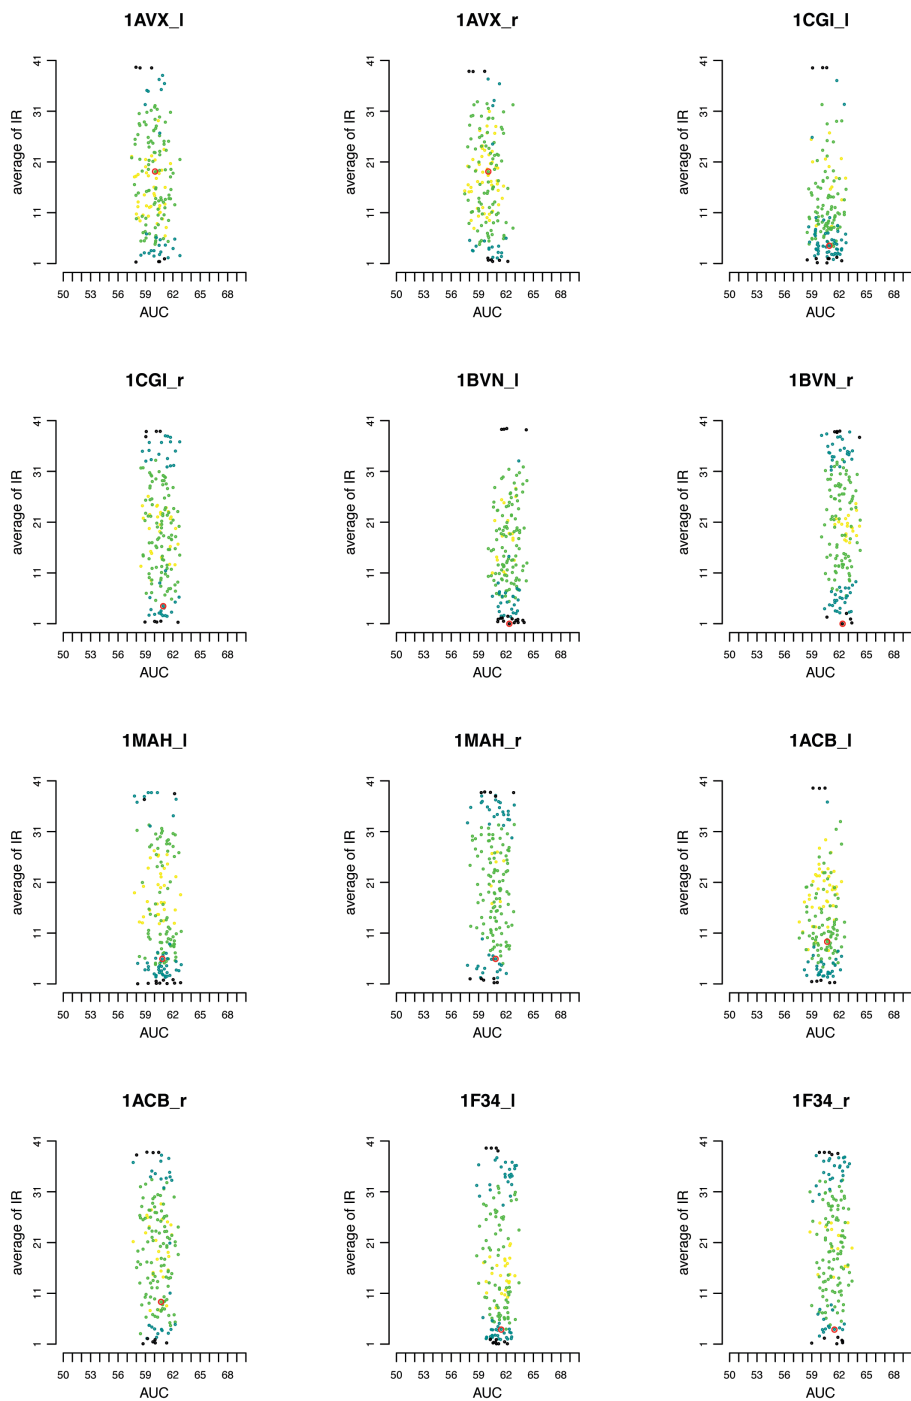

Figure S38: IR analysis of false complexes against the true one, based on predicted interfaces and the full exploration of the conformational space. Each monomer of the Mintseris Benchmark 2.0 is coupled with one of the 162 proteins (including the monomer itself) of the dataset forming either a false (161 cases) or the true complex (here we have not considered three complexes - 1DFJ, 1GCQ, 1ML0 - of the Mintseris Benchmark because JET predicted a very small interface that turned out to provide no *FIR* value). For each complex, we computed the corresponding average IR and average AUC over 100 random sets of 40 proteins. These values are reported as a point in a plot. Each plot contains 162 points. The red circle in each plot corresponds to the values of the true complex. Dots are colored in a scale from black, cyan, green, yellow. A color corresponds to the value of the standard deviation  $\sigma$  of the distribution of 100 IRs computed for a complex: black if  $\sigma \leq 1$ , cyan if  $\sigma \leq 2$ , green if  $\sigma \leq 3$  and yellow otherwise (i.e.  $\sigma > 3$ ).

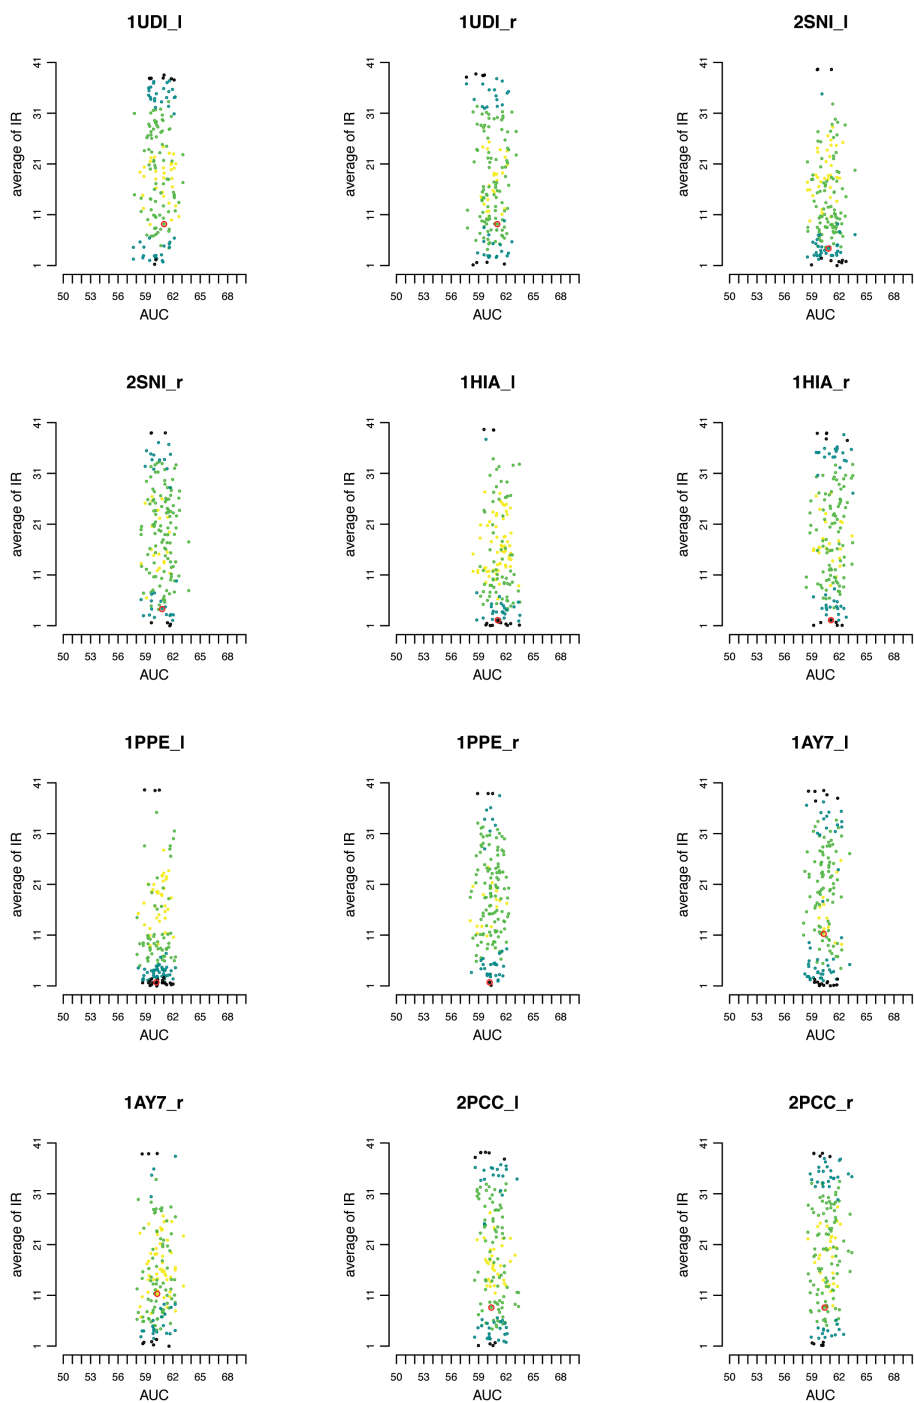

Figure S39: IR analysis of false complexes against the true one, based on predicted interfaces computed over the full conformational space. See legend in Fig. S38.



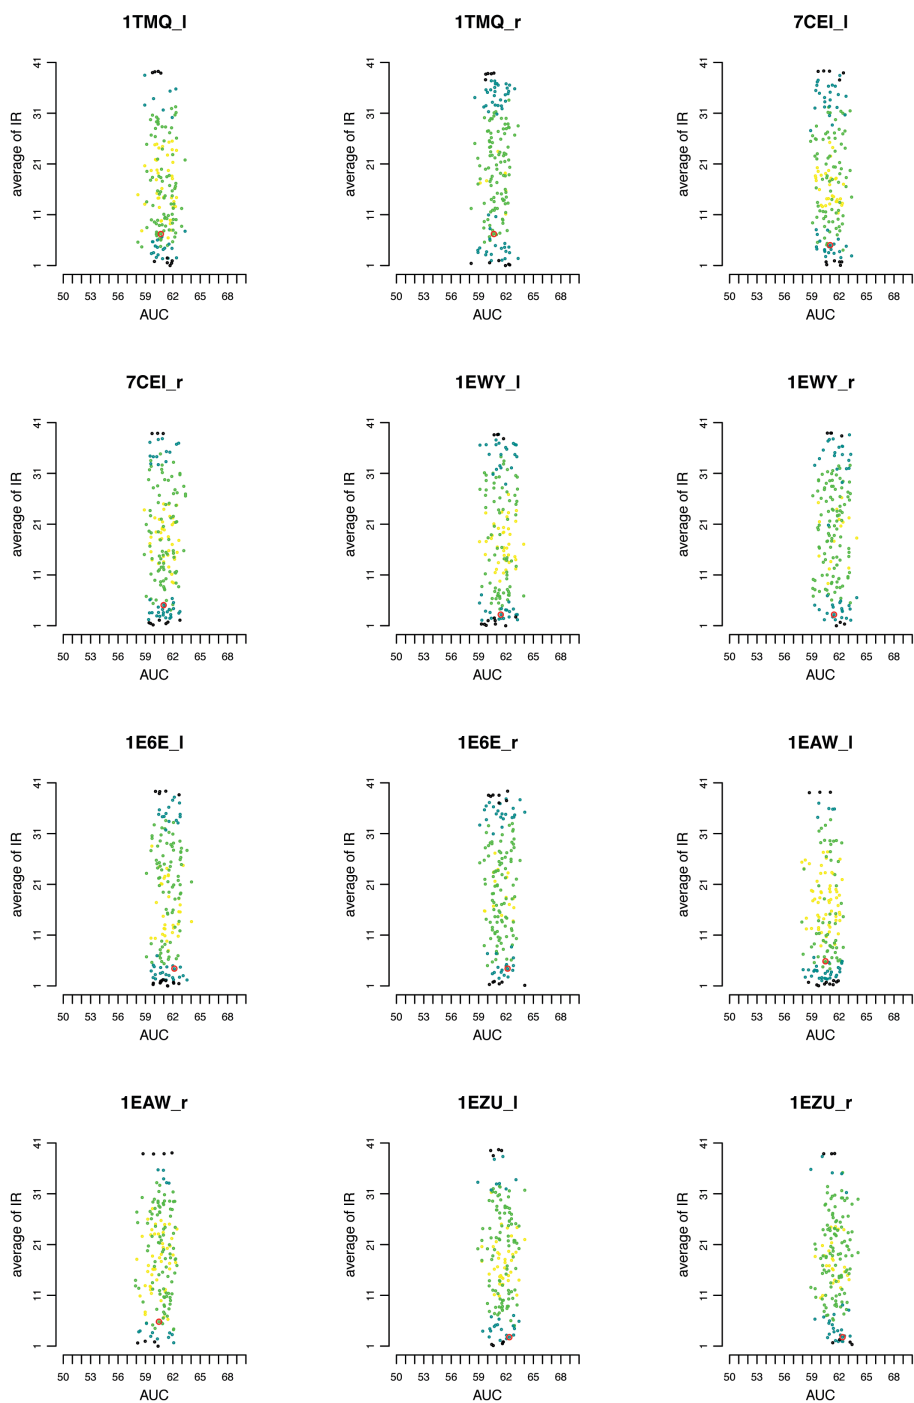

Figure S40: **IR analysis of false complexes against the true one, based on predicted interfaces computed over the full conformational space.** See legend in Fig. S38.

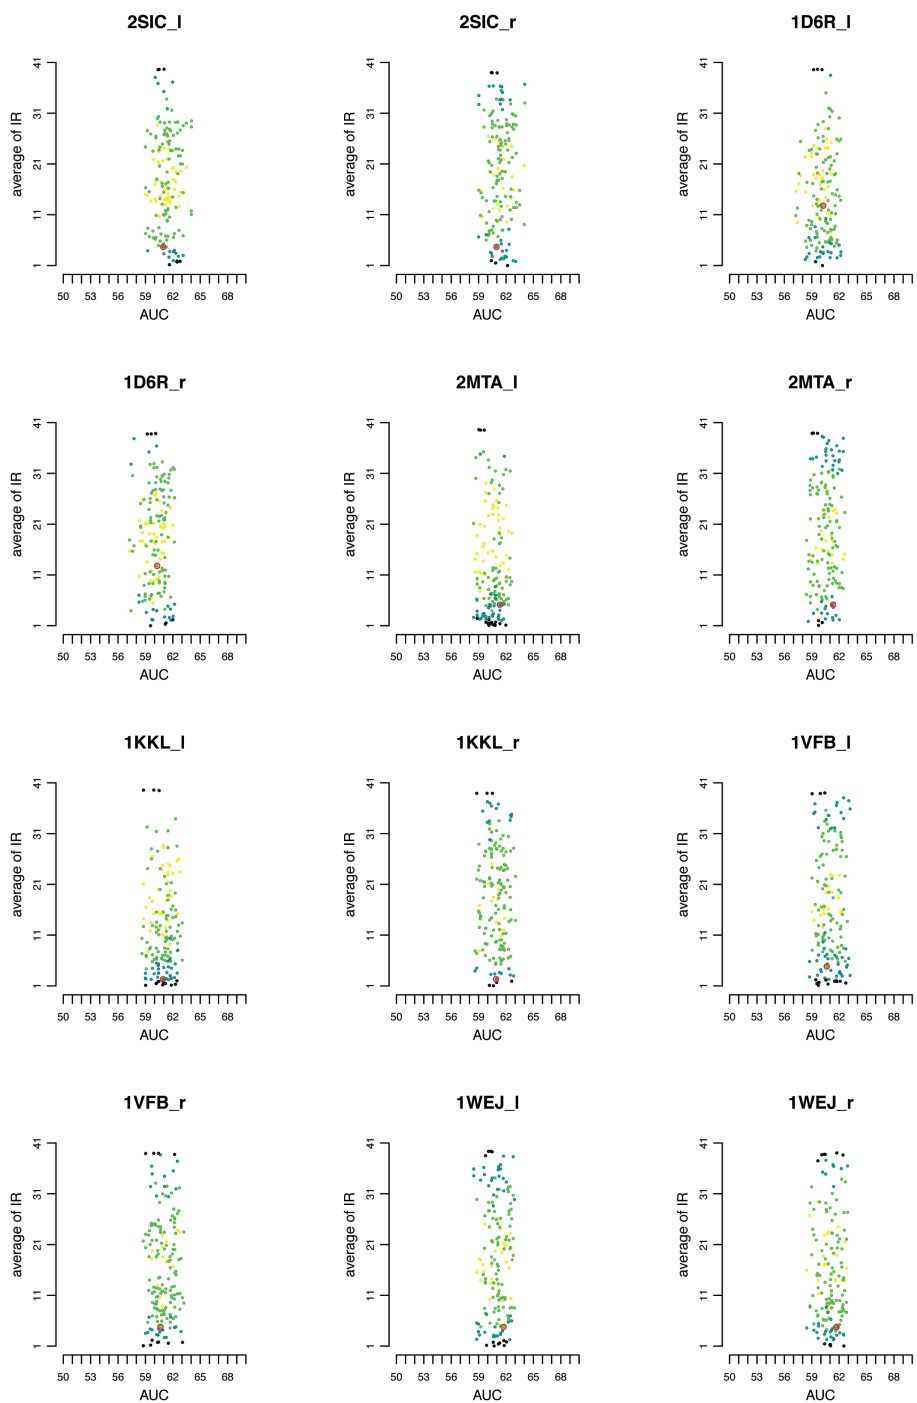

Figure S41: IR analysis of false complexes against the true one, based on predicted interfaces computed over the full conformational space. See legend in Fig. S38.

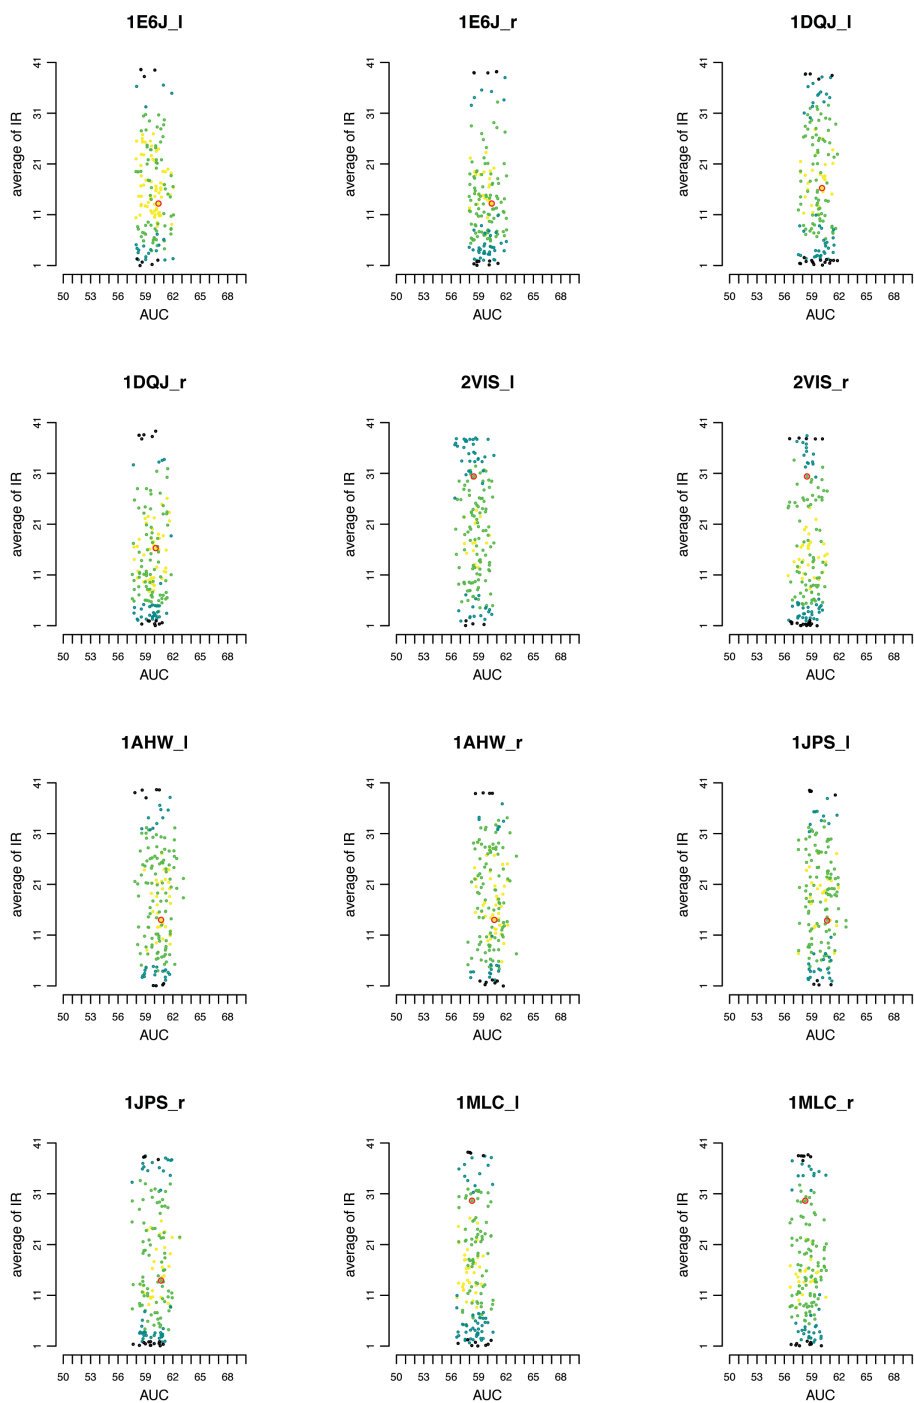

Figure S42: IR analysis of false complexes against the true one, based on predicted interfaces computed over the full conformational space. See legend in Fig. S38.

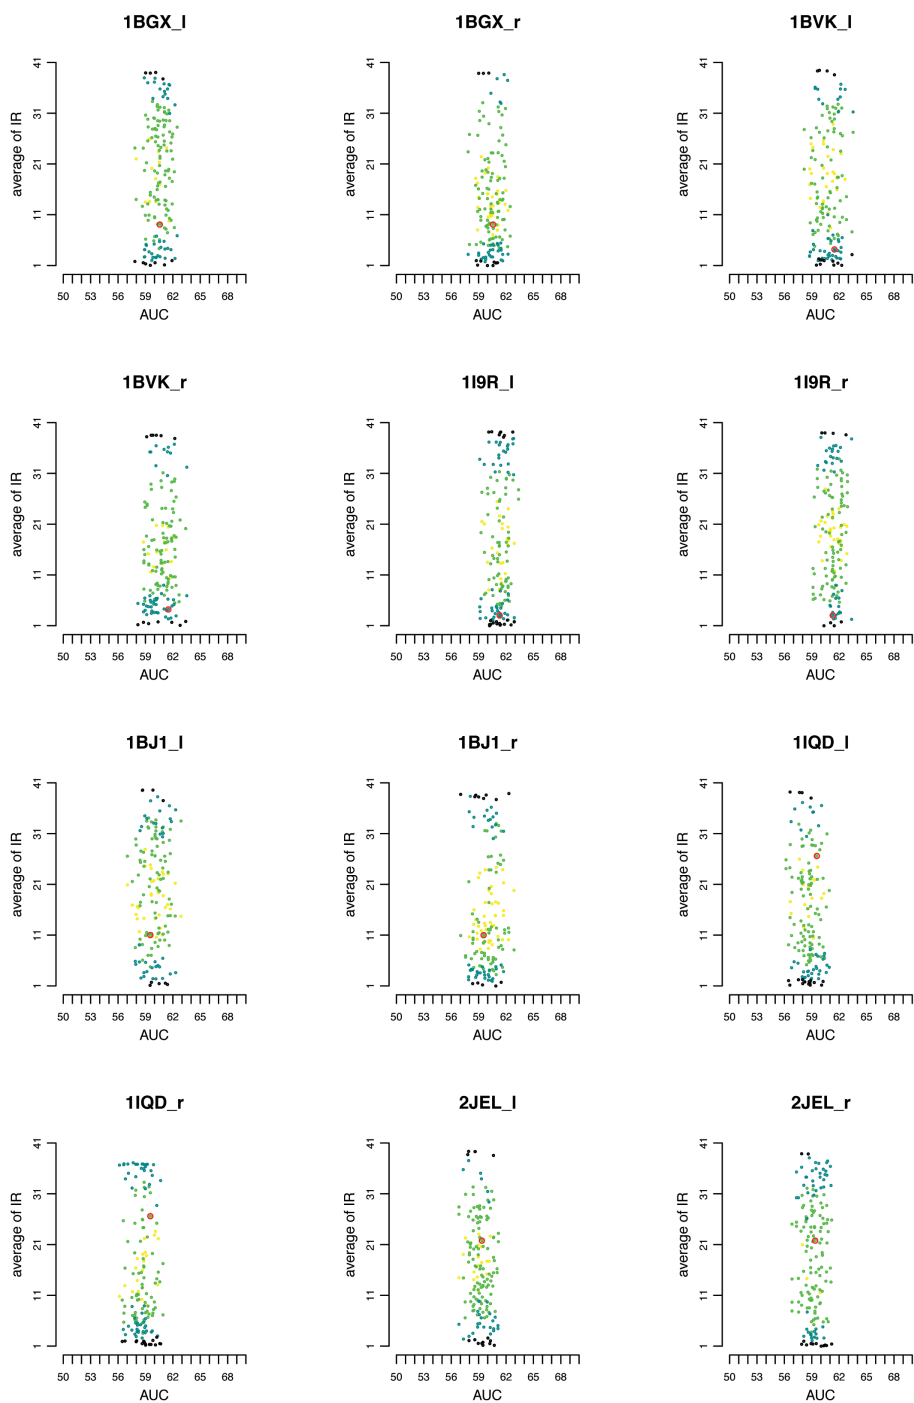

Figure S43: IR analysis of false complexes against the true one, based on predicted interfaces computed over the full conformational space. See legend in Fig. S38.

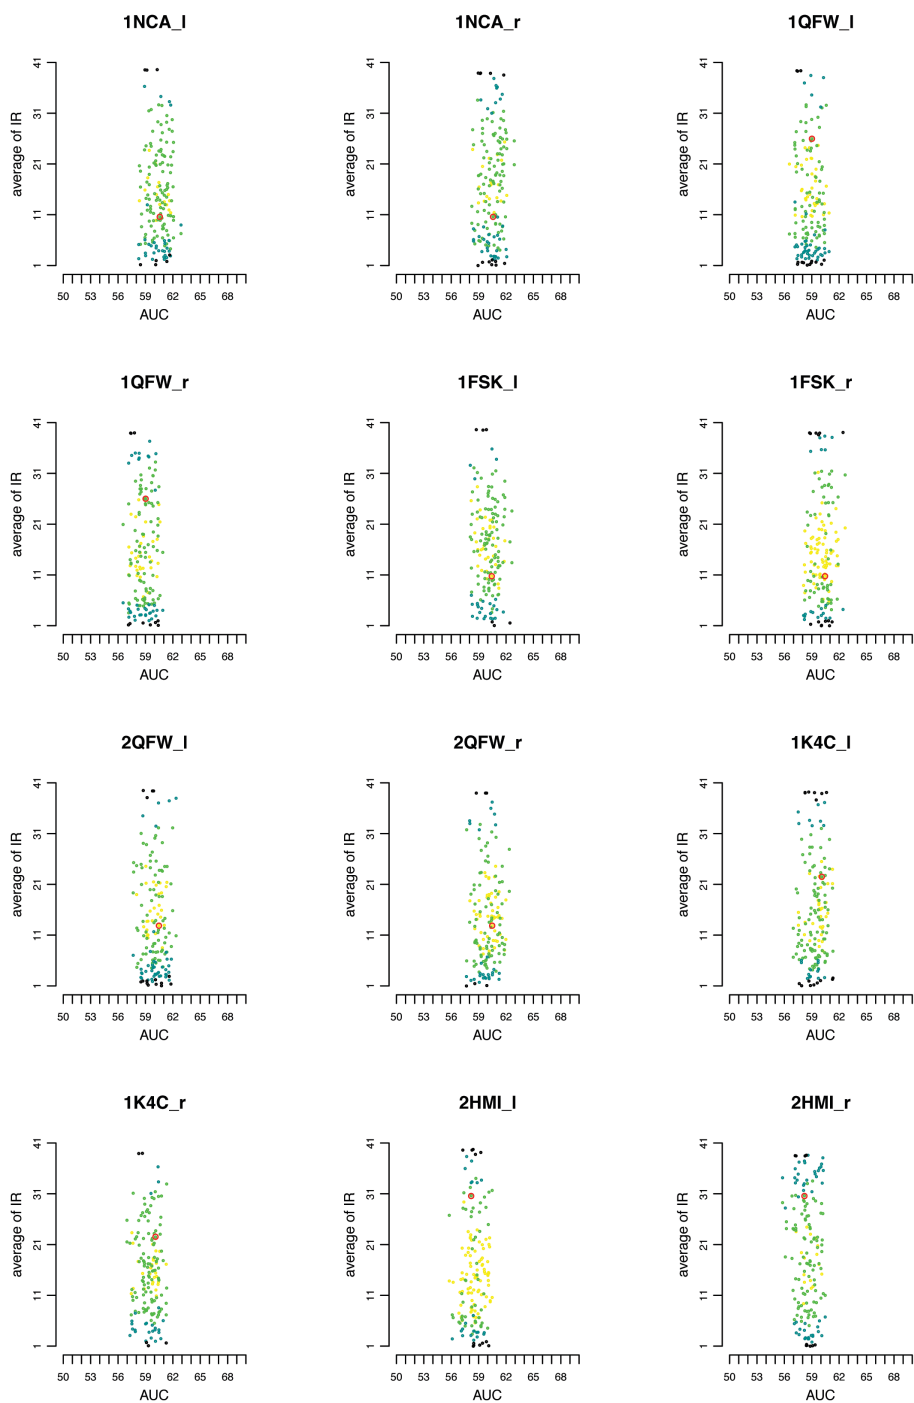

Figure S44: IR analysis of false complexes against the true one, based on predicted interfaces computed over the full conformational space. See legend in Fig. S38.

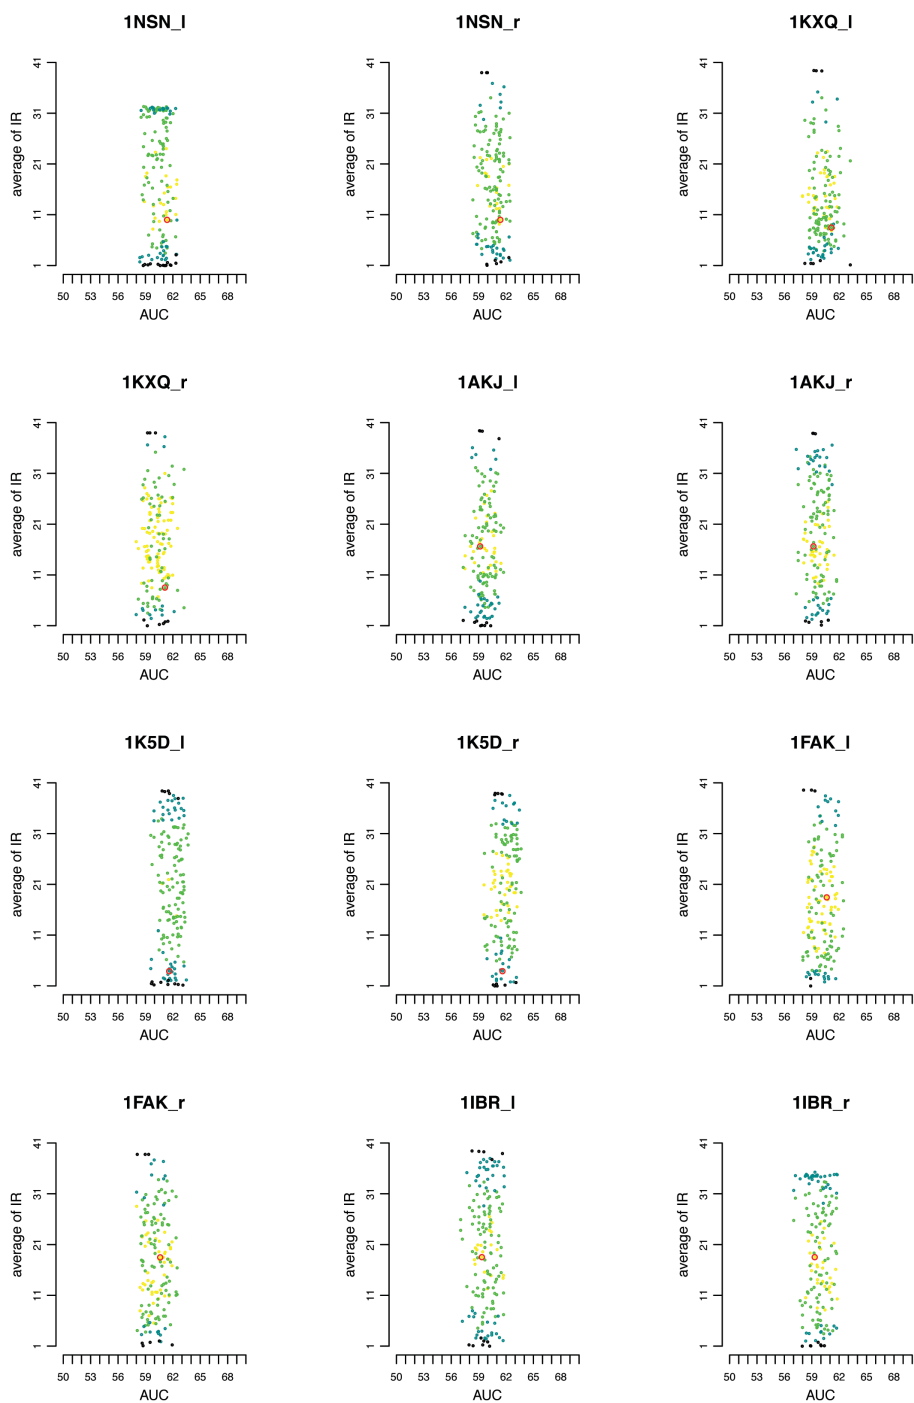

Figure S45: IR analysis of false complexes against the true one, based on predicted interfaces computed over the full conformational space. See legend in Fig. S38.

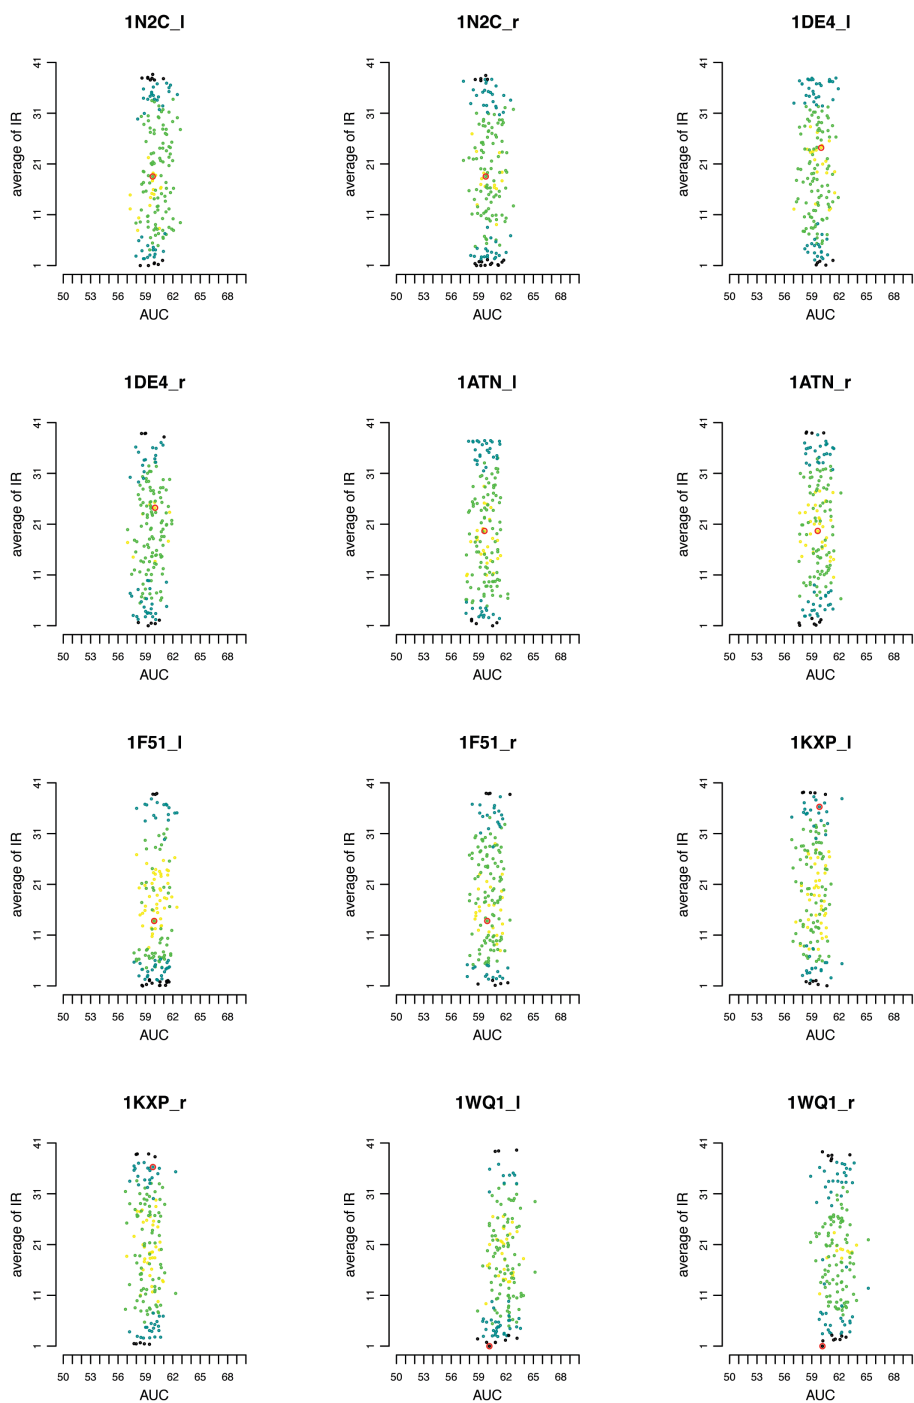

Figure S46: **IR analysis of false complexes against the true one, based on predicted interfaces computed over the full conformational space.** See legend in Fig. S38.

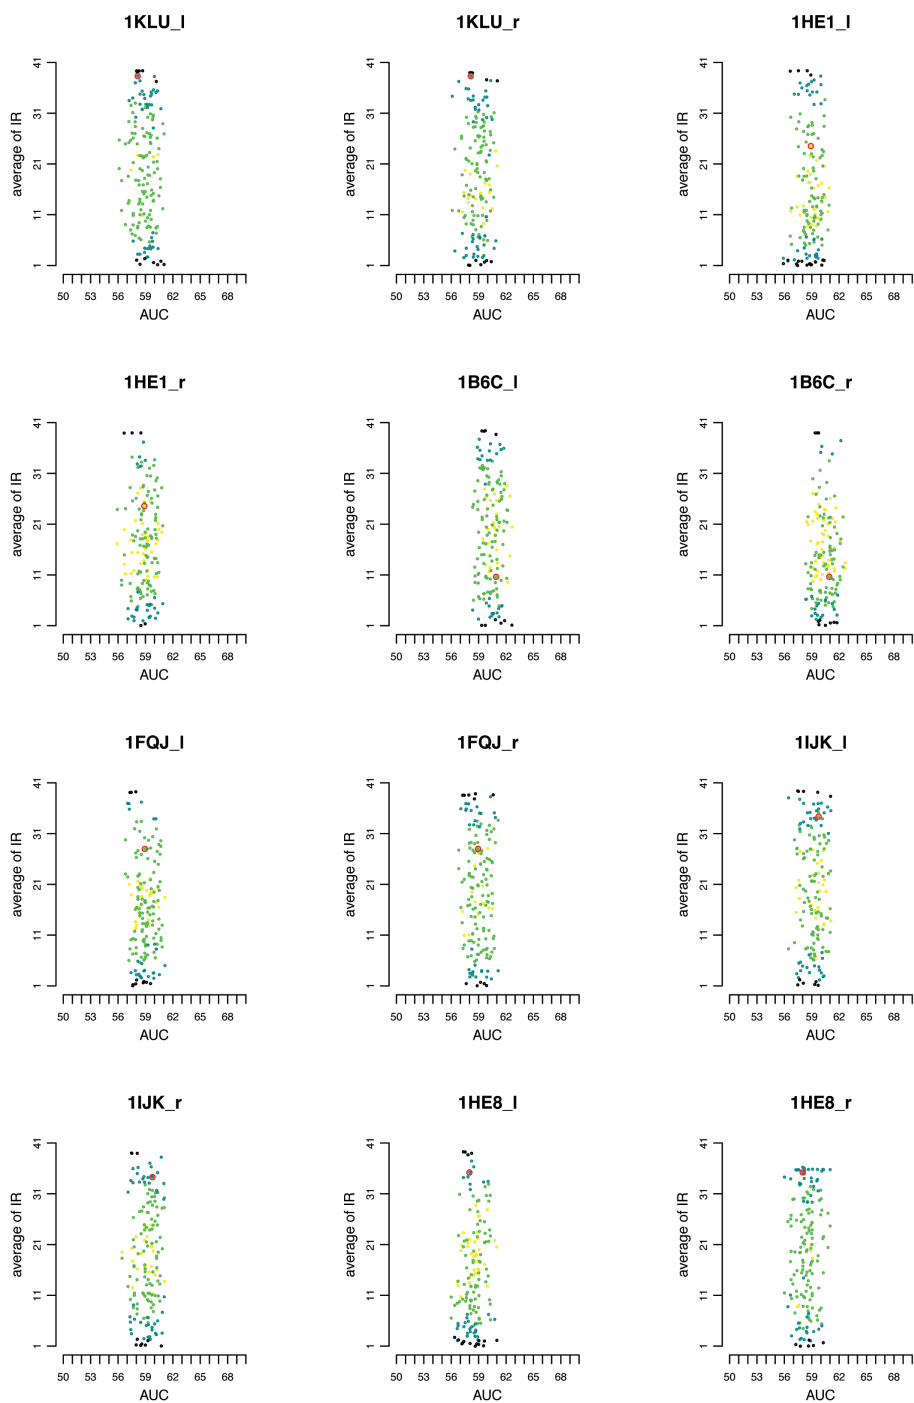

Figure S47: IR analysis of false complexes against the true one, based on predicted interfaces computed over the full conformational space. See legend in Fig. S38.



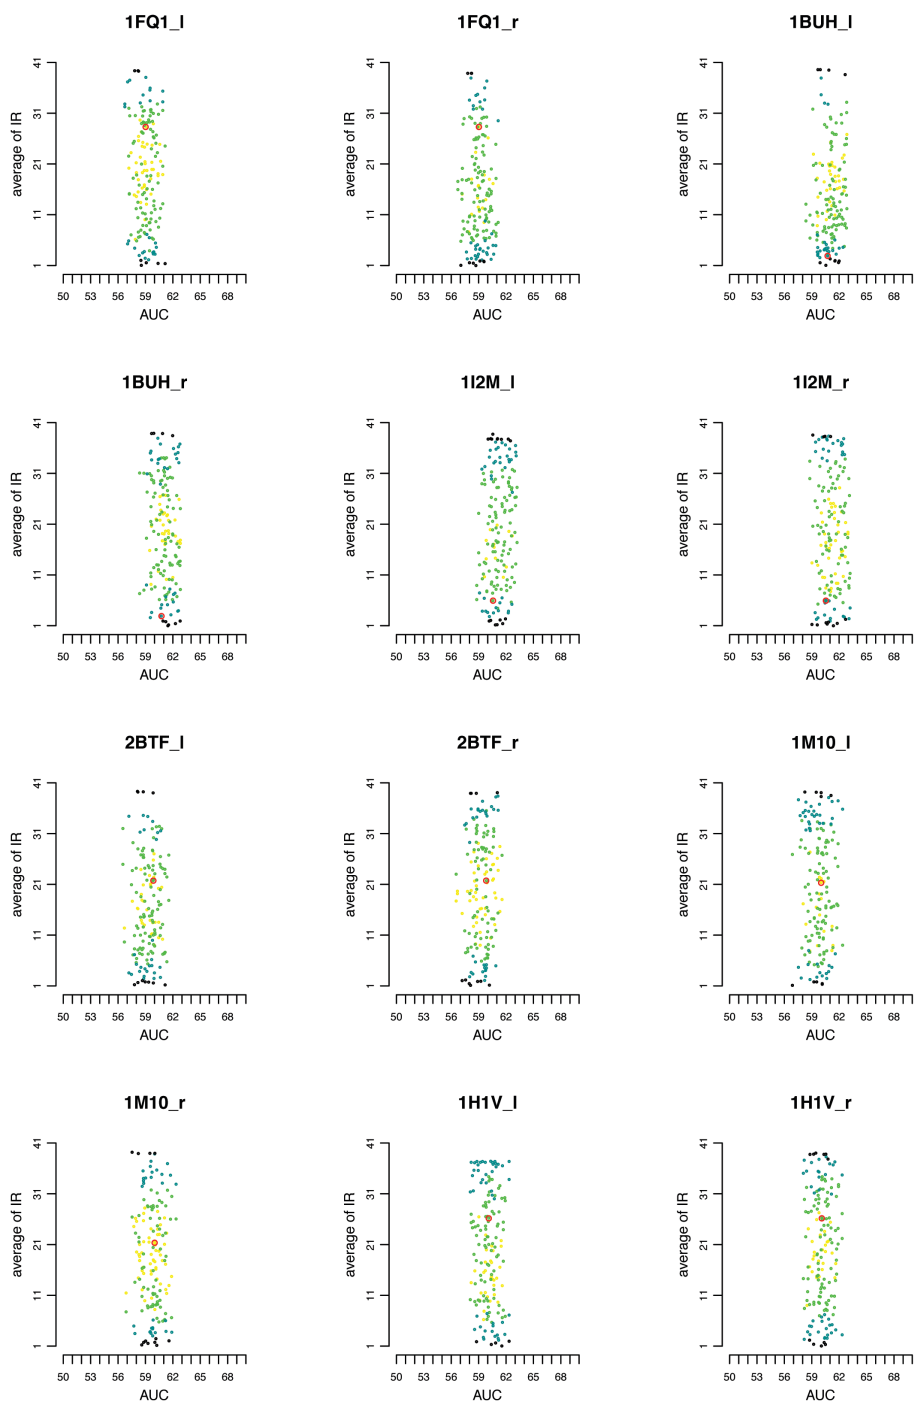

Figure S48: IR analysis of false complexes against the true one, based on predicted interfaces computed over the full conformational space. See legend in Fig. S38.

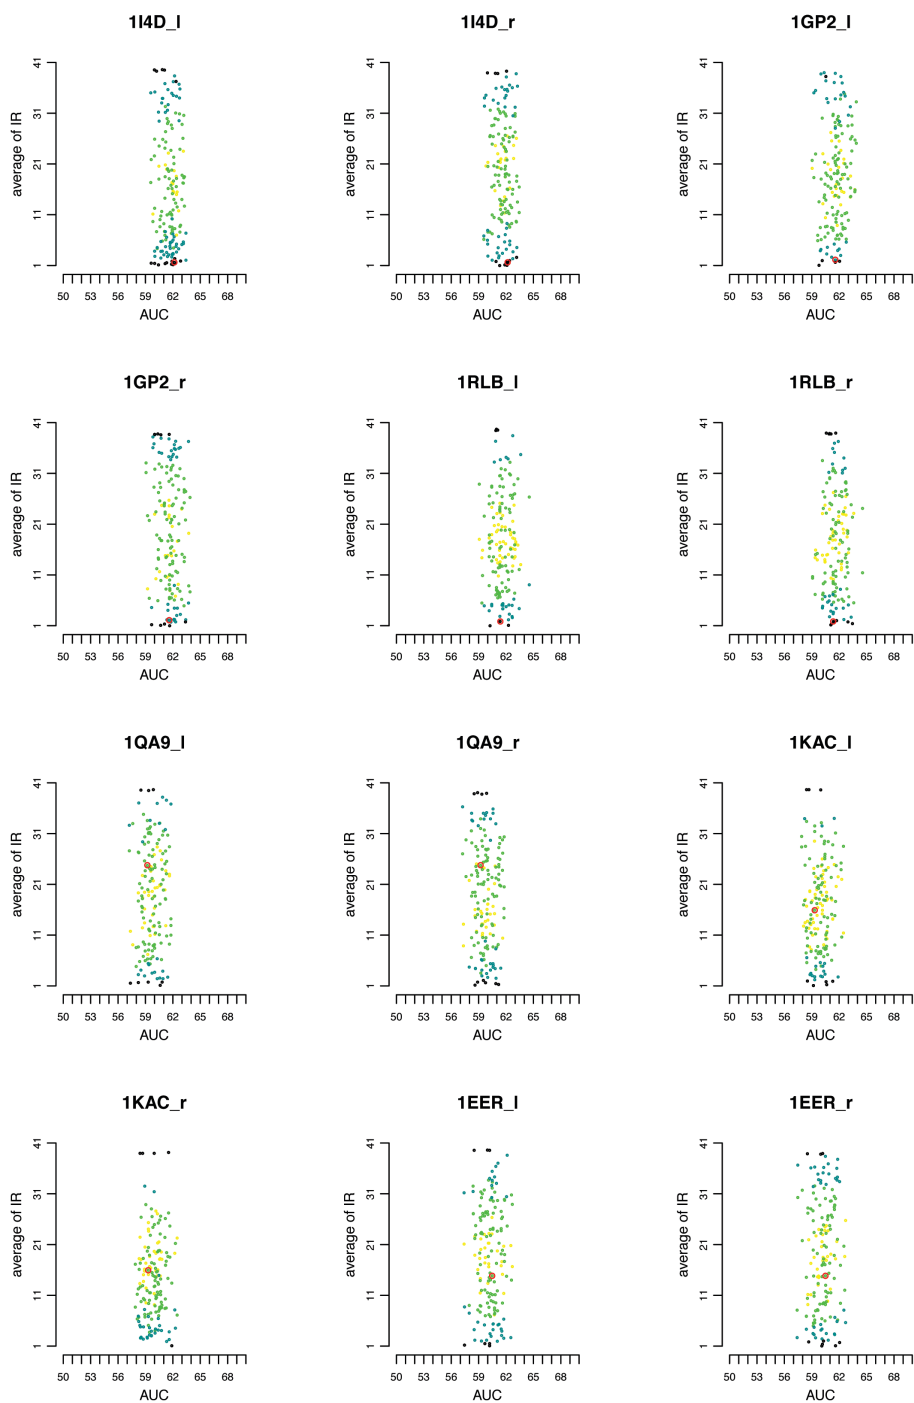

Figure S49: IR analysis of false complexes against the true one, based on predicted interfaces computed over the full conformational space. See legend in Fig. S38.

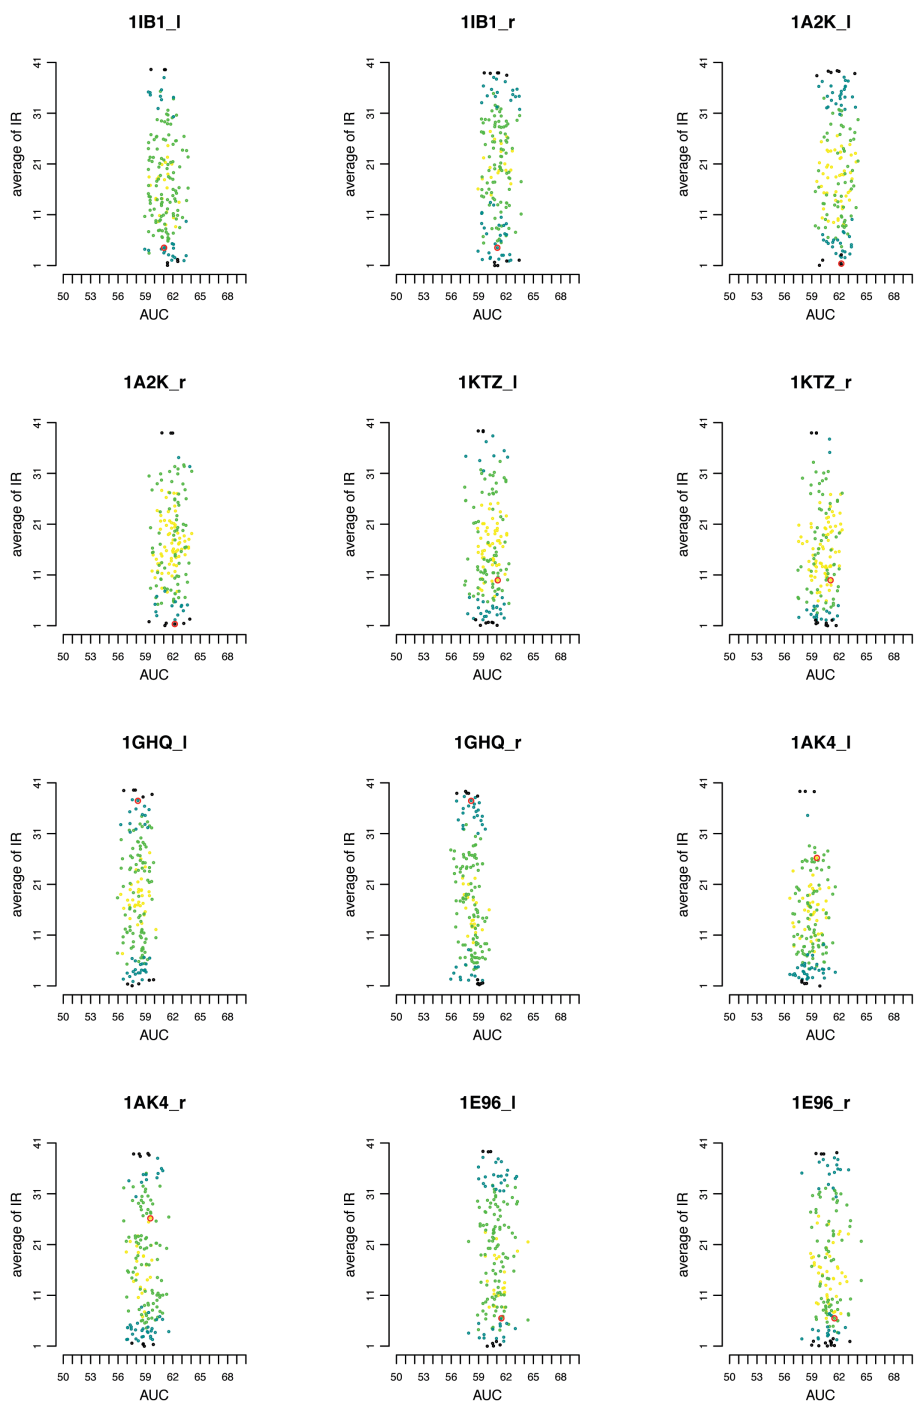

Figure S50: IR analysis of false complexes against the true one, based on predicted interfaces computed over the full conformational space. See legend in Fig. S38.

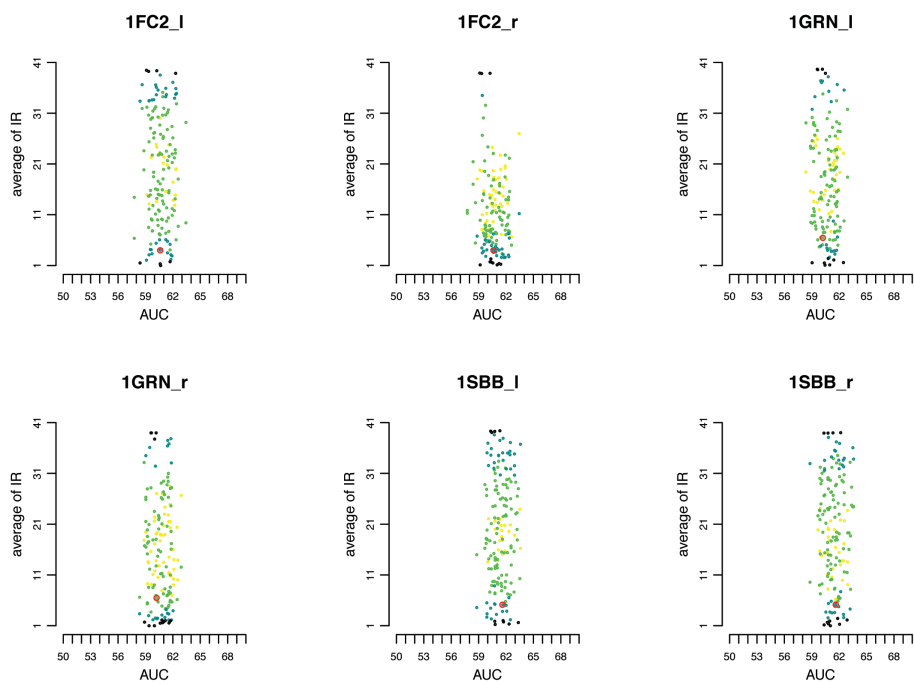

Figure S51: **IR analysis of false complexes against the true one, based on predicted interfaces computed over the full conformational space.** See legend in Fig. S38.

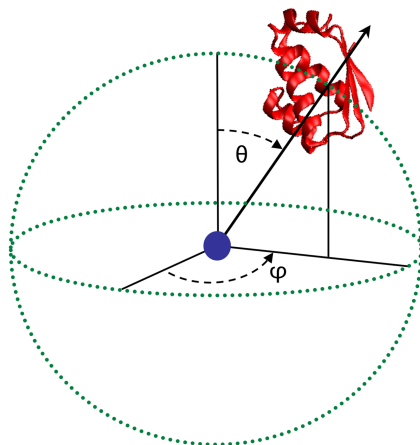

Figure S52: **Schematic view of the docking algorithm.** For each starting position, defined by the Euler angles  $\theta$  and  $\phi$ , uniformly spaced around the receptor protein (blue point), the orientation and distance of ligand protein (in red) from the receptor is optimized during energy minimization.

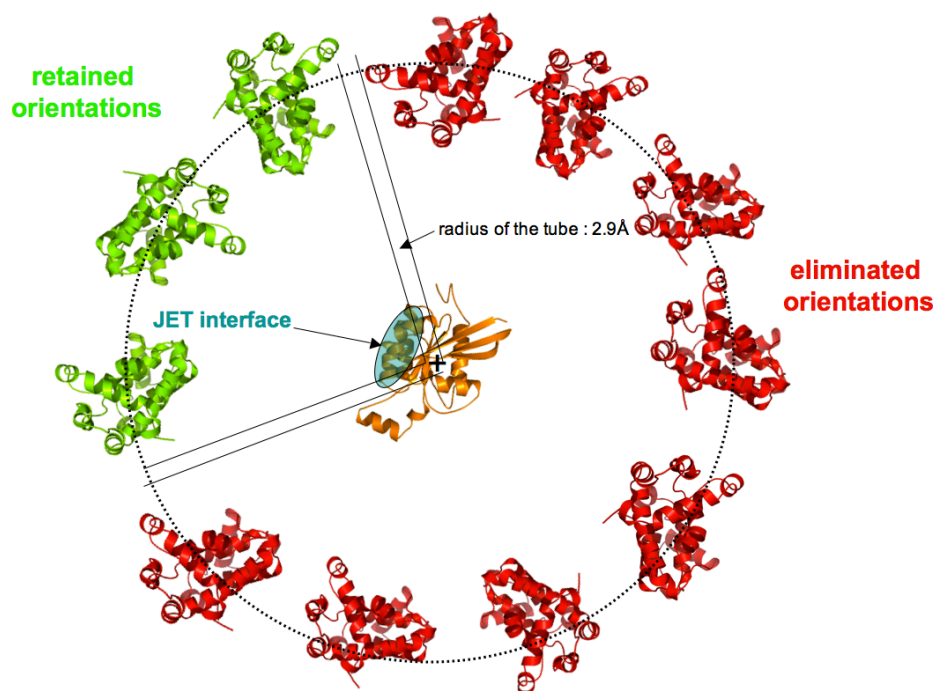

Figure S53: **Cone defined around the predicted interface.** For each receptor, one predicts the location of its interface based on evolutionary information and computes a region around it that approximate the location where the real interface is supposed to lie. Docking is restricted to this region of the receptor.

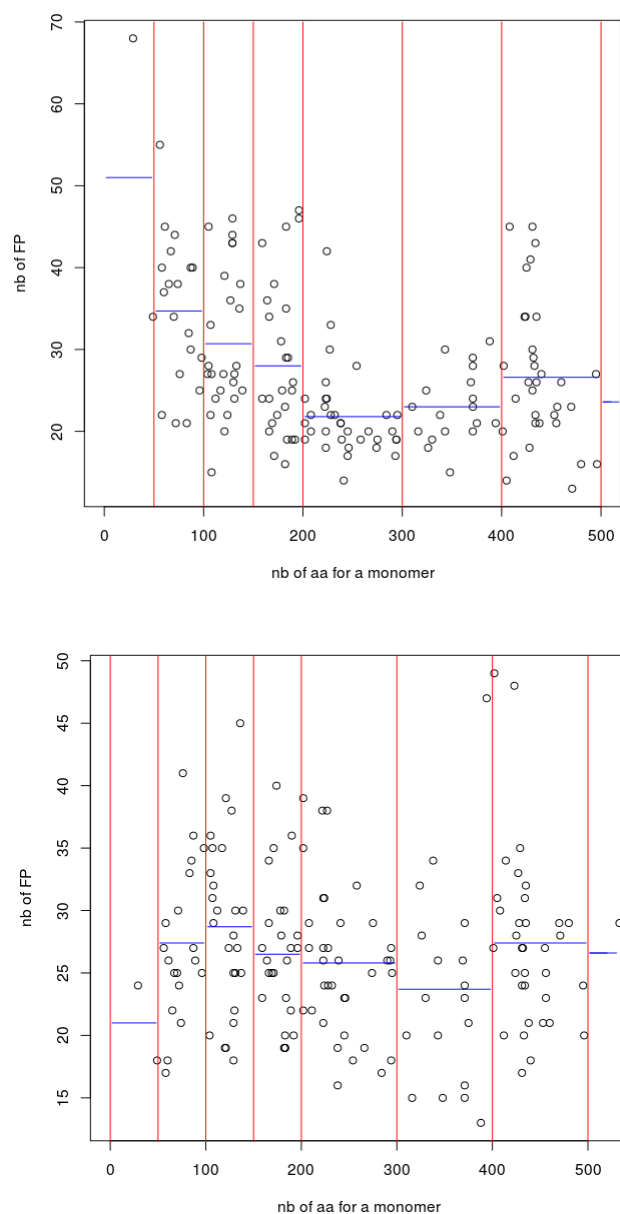

Figure S54: **Number of interaction partners for proteins of different sizes.** For each monomer in the Mintseris dataset, we report the number of protein partners with average IR  $\leq 10$ . This is done on predictions (top) and knowing experimental interfaces (bottom). Red vertical bars indicate size intervals and blue horizontal bars indicate the mean of the distribution of average IRs for the proteins within a given size interval. The blue bars for the interval corresponding to proteins of sizes  $\geq 500$ aa are computed on more proteins than shown in the plot. The protein's small size effect recognizable for predictions, disappears when experimental interfaces are used.

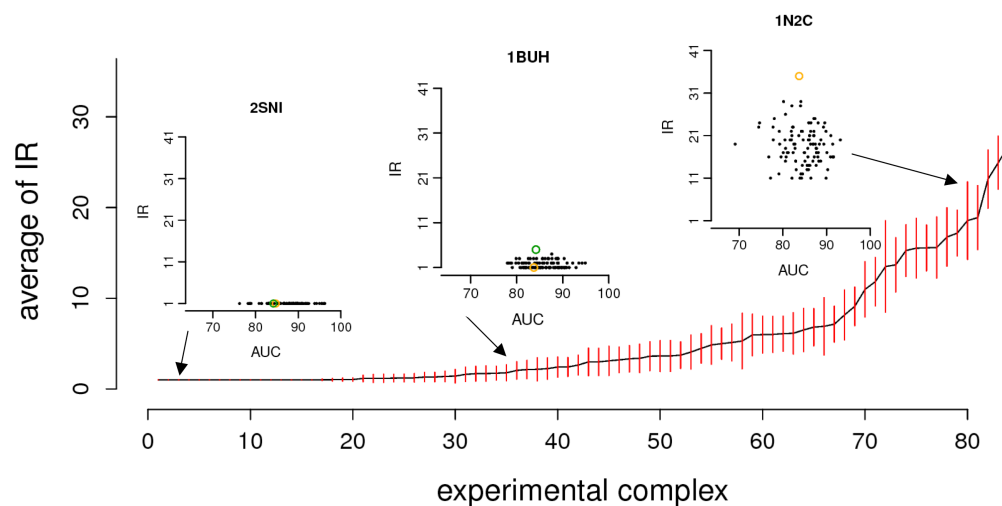

Figure S55: **Robustness of the native complex predictions with respect to the environment composition. Analysis based on knowledge of experimental interfaces.** Average Interaction Rank (IR) of the experimental partners computed over 100 random sets made of 40 proteins each (with error bars in red). The 84 complexes are ordered with respect to their increasing average IR value. For three of the 84 complexes (1BVN, 1BUH, 1N2C), detailed plots show the IR of the complex within each of the 100 random sets and the corresponding AUC value (black dots); green dots correspond to the IR of the complex computed over the Mintseris dataset; orange dots correspond to the IR of the complex computed over complexes in the same functional class. Compare to Figure 4 in the article.

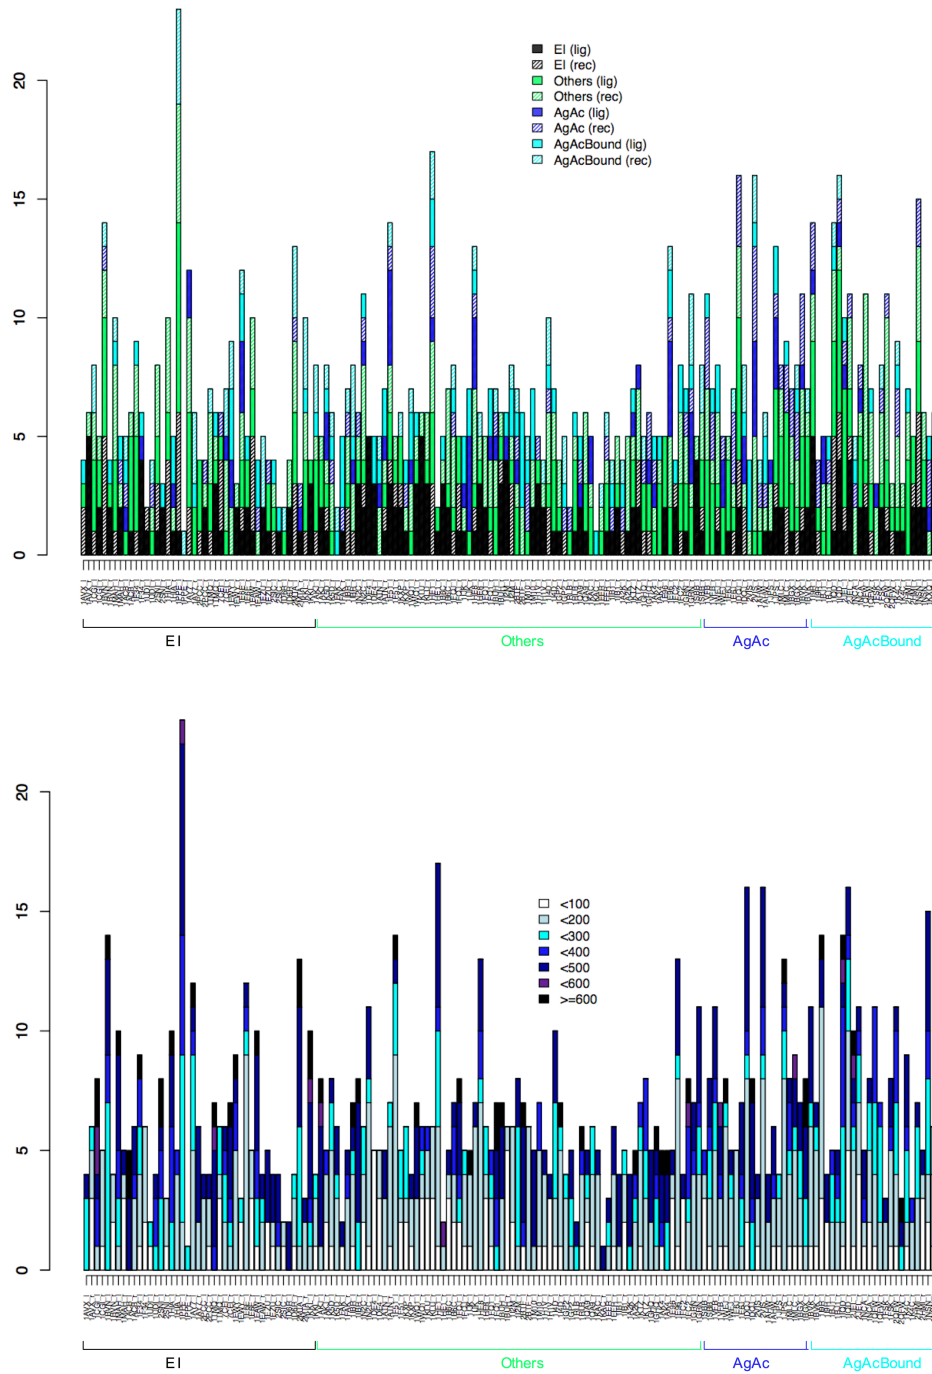

Figure S56: **Analysis of strongly interacting partners for the proteins in the Mintseris dataset.** Two analysis of the partners displaying strong interactions with the proteins in the Mintseris dataset (average IR < 5; see Fig. S38-S51) are reported. They describe the functional classes (top) and the sizes (bottom) of the partners for each monomer. The size of a partner is measured by the number of amino-acid of its sequence.



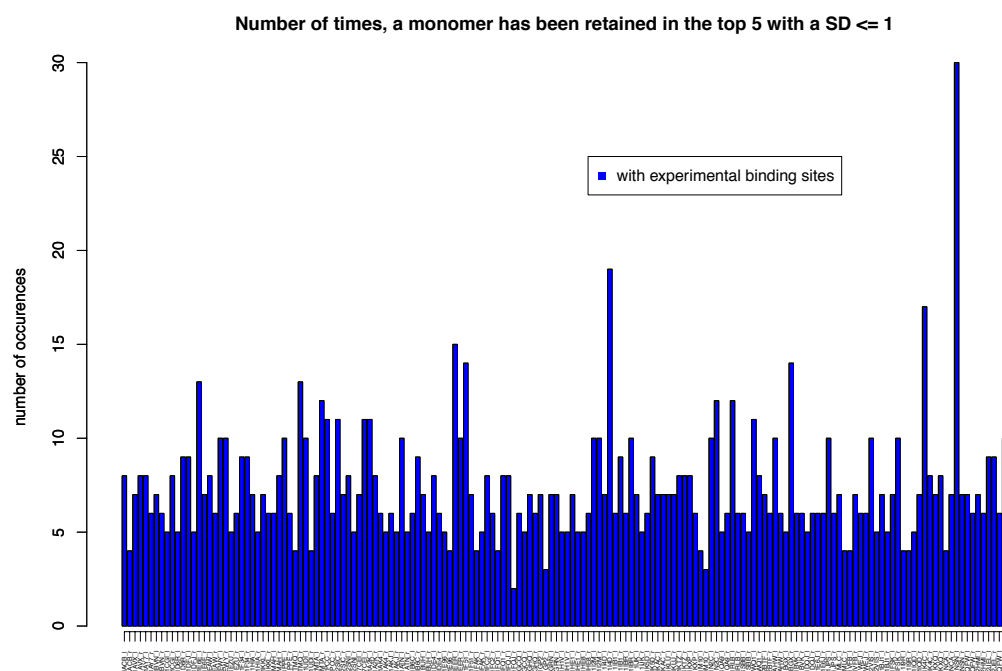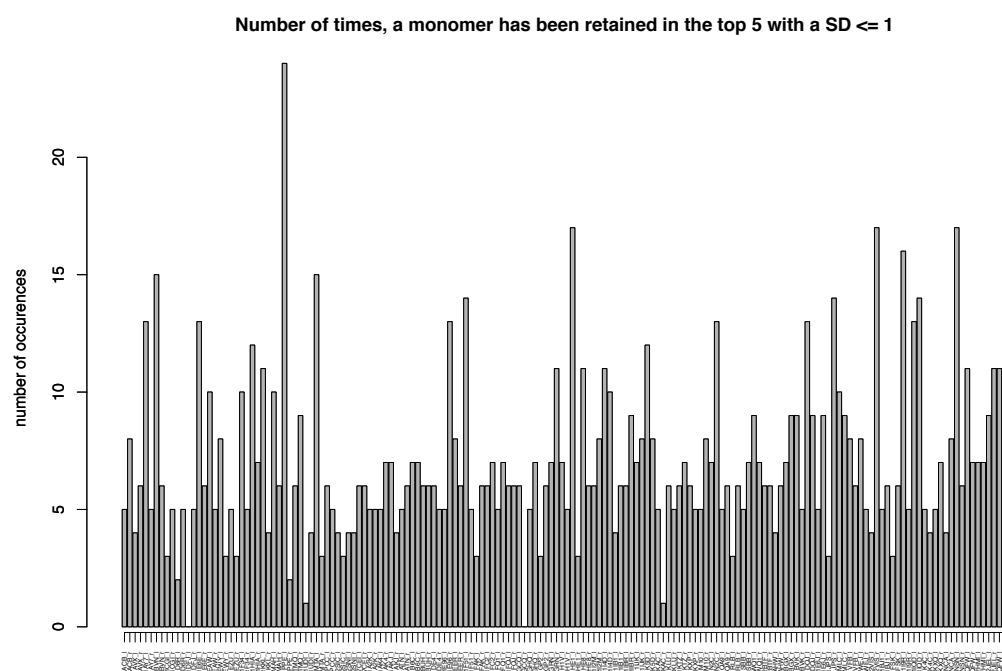

Figure S57: Analysis of strongly interacting partners for the monomers in the Mintseris dataset. Two analyses of the partners displaying strong interactions with the monomers in the Mintseris dataset (average IR  $< 5$ ; see Fig. S38-S51) are reported for analyses based on the knowledge of experimental interfaces (top) and based on binding sites predictions (bottom).

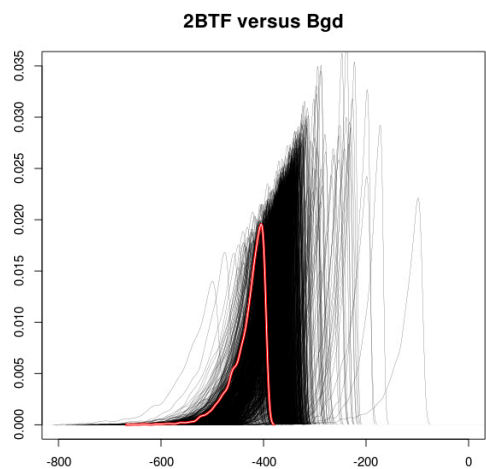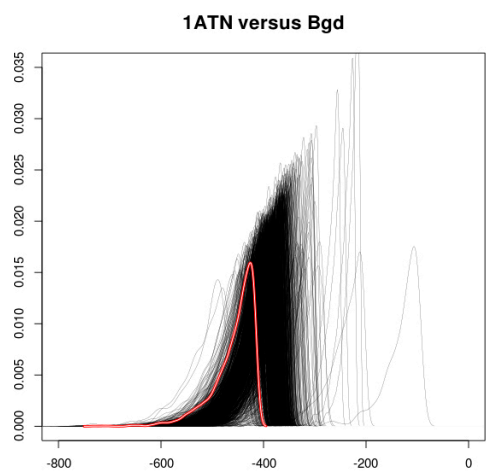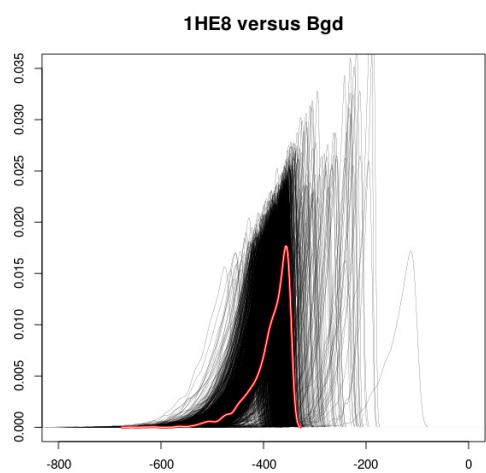

Figure S58: **HEX v6.3 analysis of proteins 2BTF\_1, 1ATN\_1, 1HE8\_1.** HEX v6.3 was run on the three ligands of the complexes 2BTF, 1ATN, 1HE8 against a background of 922 proteins as done in (Wass M.N. et al. *Mol. Sys. Biol.* 2011). Direct comparison of these figures with Figures S5 and S10A in (Wass M.N. et al. *Mol. Sys. Biol.* 2011) shows that docking results are not reproducible.

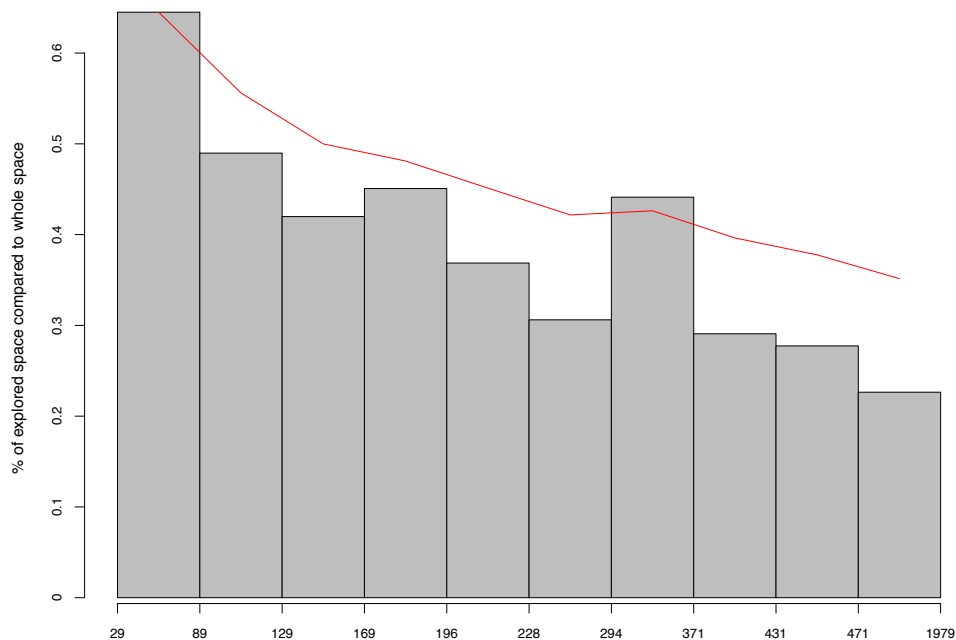

Figure S59: **Exploration of the restricted configuration space.** Diagram representing the proportion of explored configuration space compared to the whole space after the restriction based on JET. The set of proteins in the Mintseris dataset is split in 10 quantiles (bins) of 17 proteins each, selected by ordering the proteins with respect to their increasing sizes (x-axis). For each bin we computed the number of configurations for the proteins on their restricted configuration space and divide it by the total number of configurations for them. Then, each bin is associated to the percentage of the restricted configuration space (y-axis) computed as an average for all proteins in the bin. The cumulative average (from smaller to larger proteins) is given by the red curve (from left to right): the full set of 168 proteins corresponds to an average of 35% of the full space, small proteins exploration amounts to 64.5%, and large proteins exploration to 22.6%.

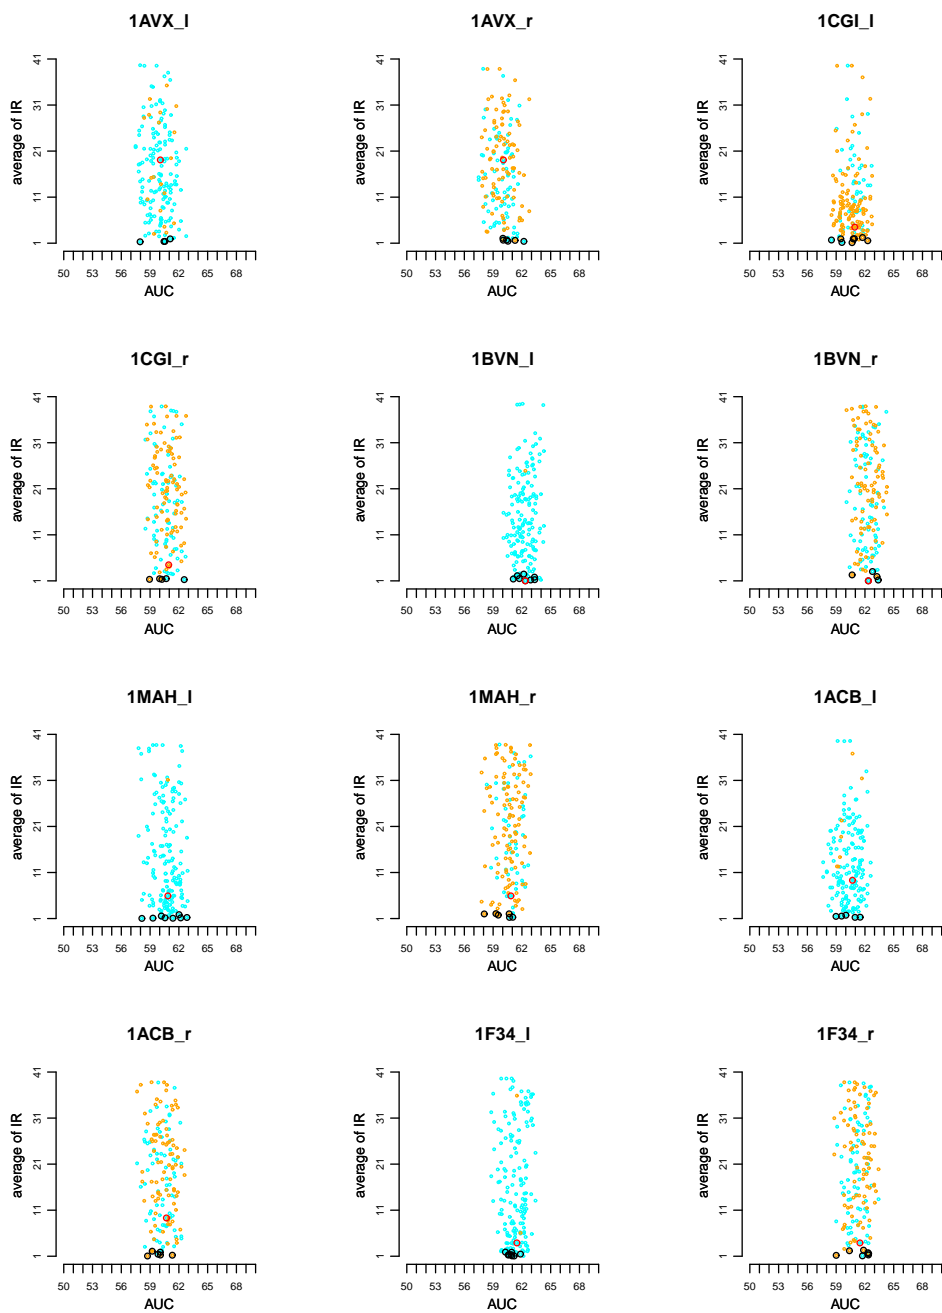

Figure S60: **Species information associated to the IR analysis of false complexes against the true one reported in Fig. S38-S51.** Each plot is associated to a protein structure  $P$  in the Mintseris dataset (see legend of Fig. S38 for plot's description - the IR analysis is based on predicted interfaces and the full exploration of the conformational space). Orange dots identify partners that have an homolog of the same species as  $P$ , and cyan dots identify the absence of a known homolog in that species. Homology has been computed based on 60% sequence identity (see Methods). A black contour line identifies bottom black dots in the plots of Fig. S38-S51. The red contour identifies the true interacting partner.

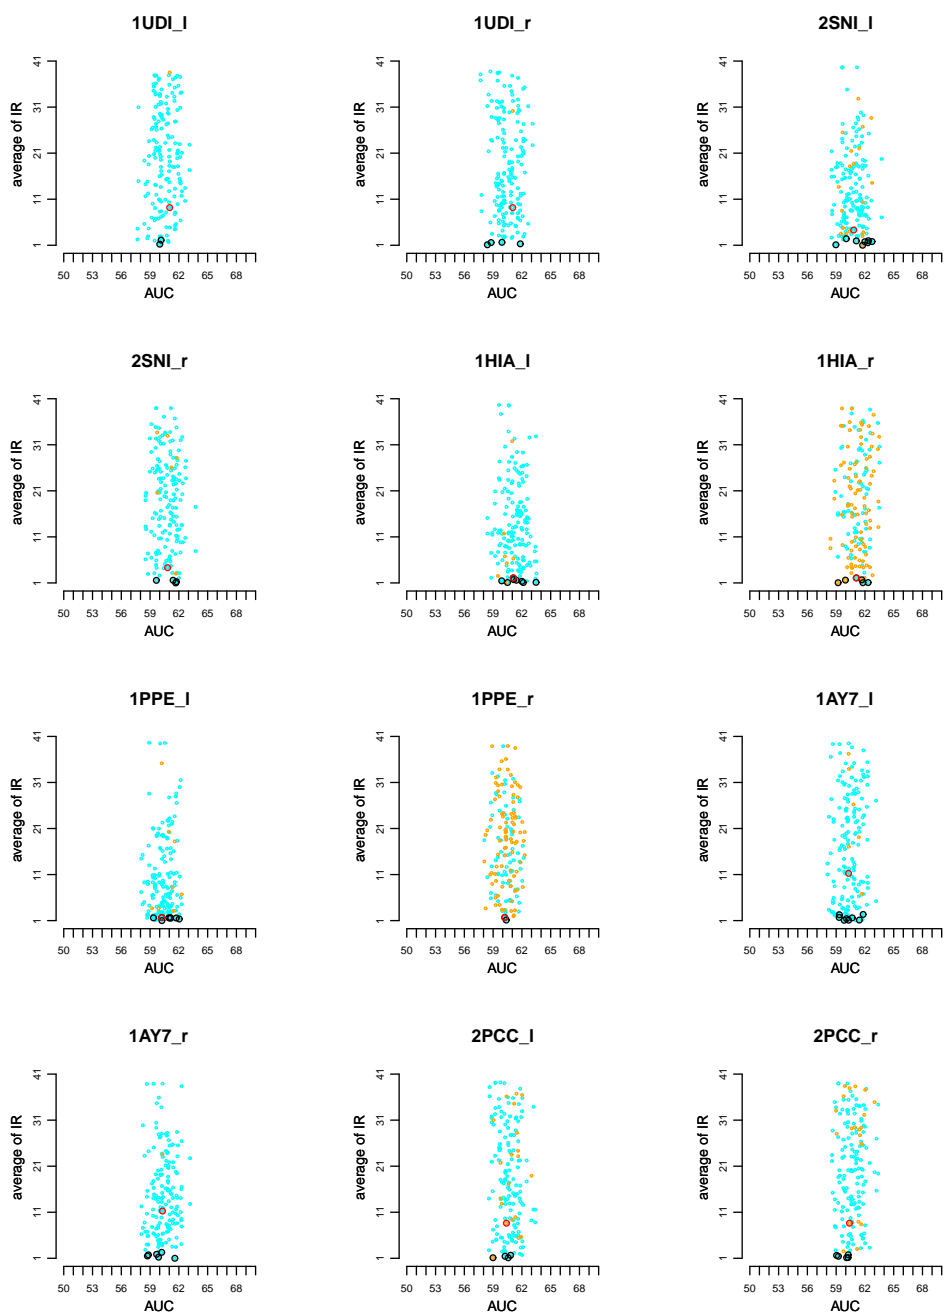

Figure S61: Species information associated to the IR analysis of false complexes against the true one reported in Fig. S38-S51. See legend in Fig. S60.

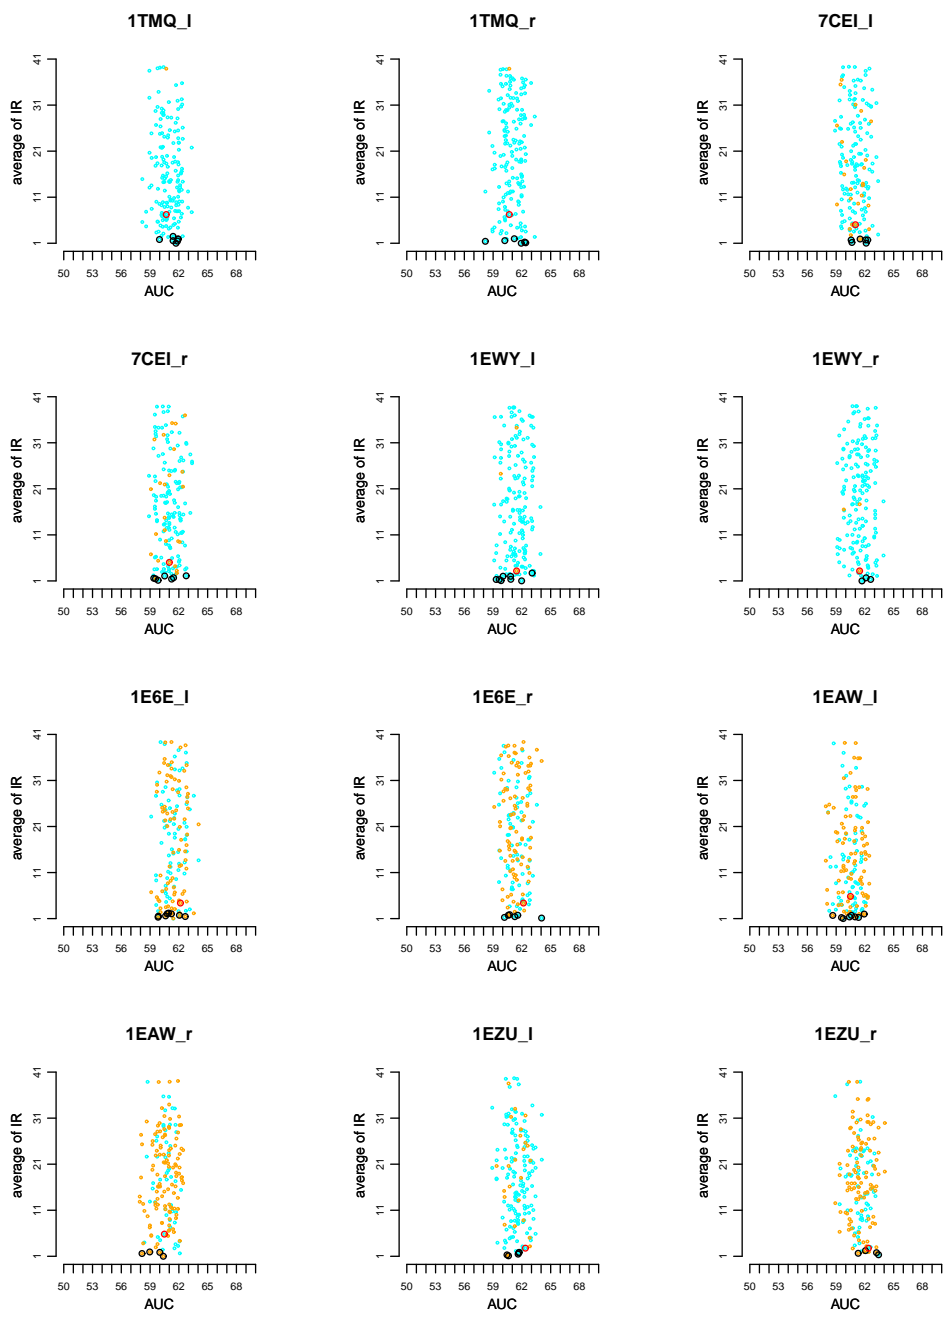

Figure S62: Species information associated to the IR analysis of false complexes against the true one reported in Fig. S38-S51. See legend in Fig. S60.

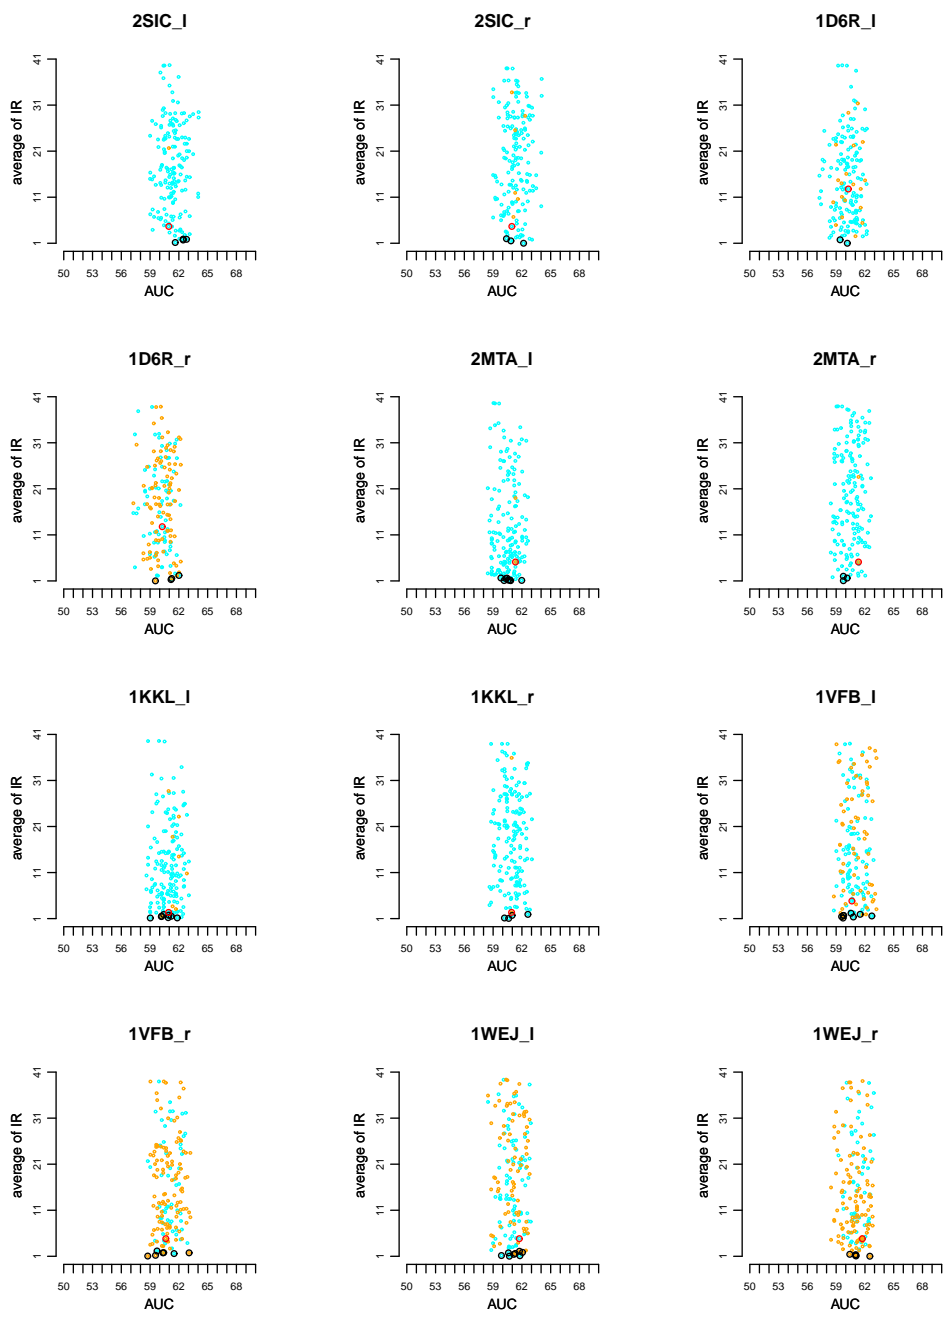

Figure S63: Species information associated to the IR analysis of false complexes against the true one reported in Fig. S38-S51. See legend in Fig. S60.

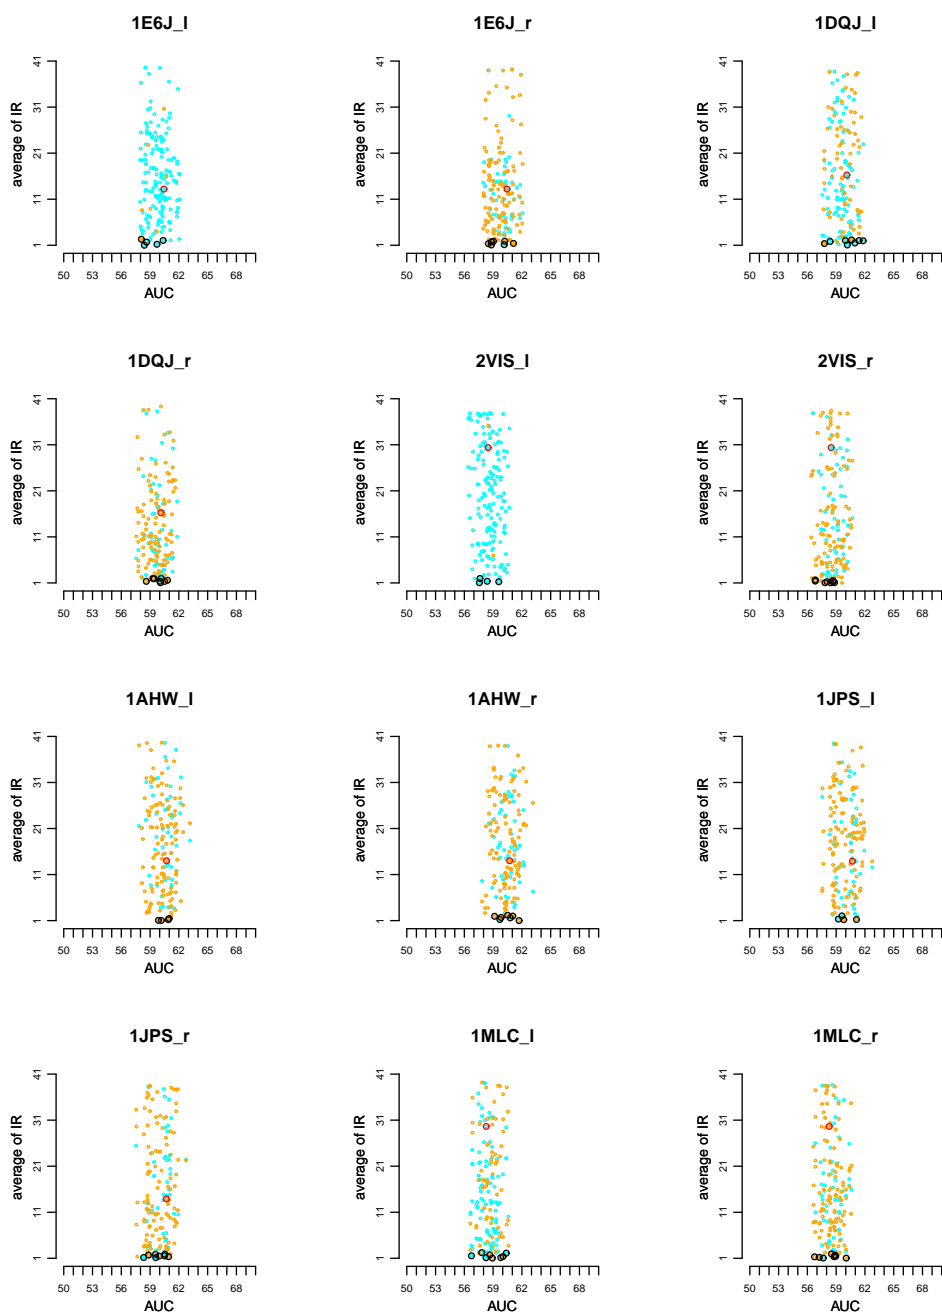

Figure S64: Species information associated to the IR analysis of false complexes against the true one reported in Fig. S38-S51. See legend in Fig. S60.



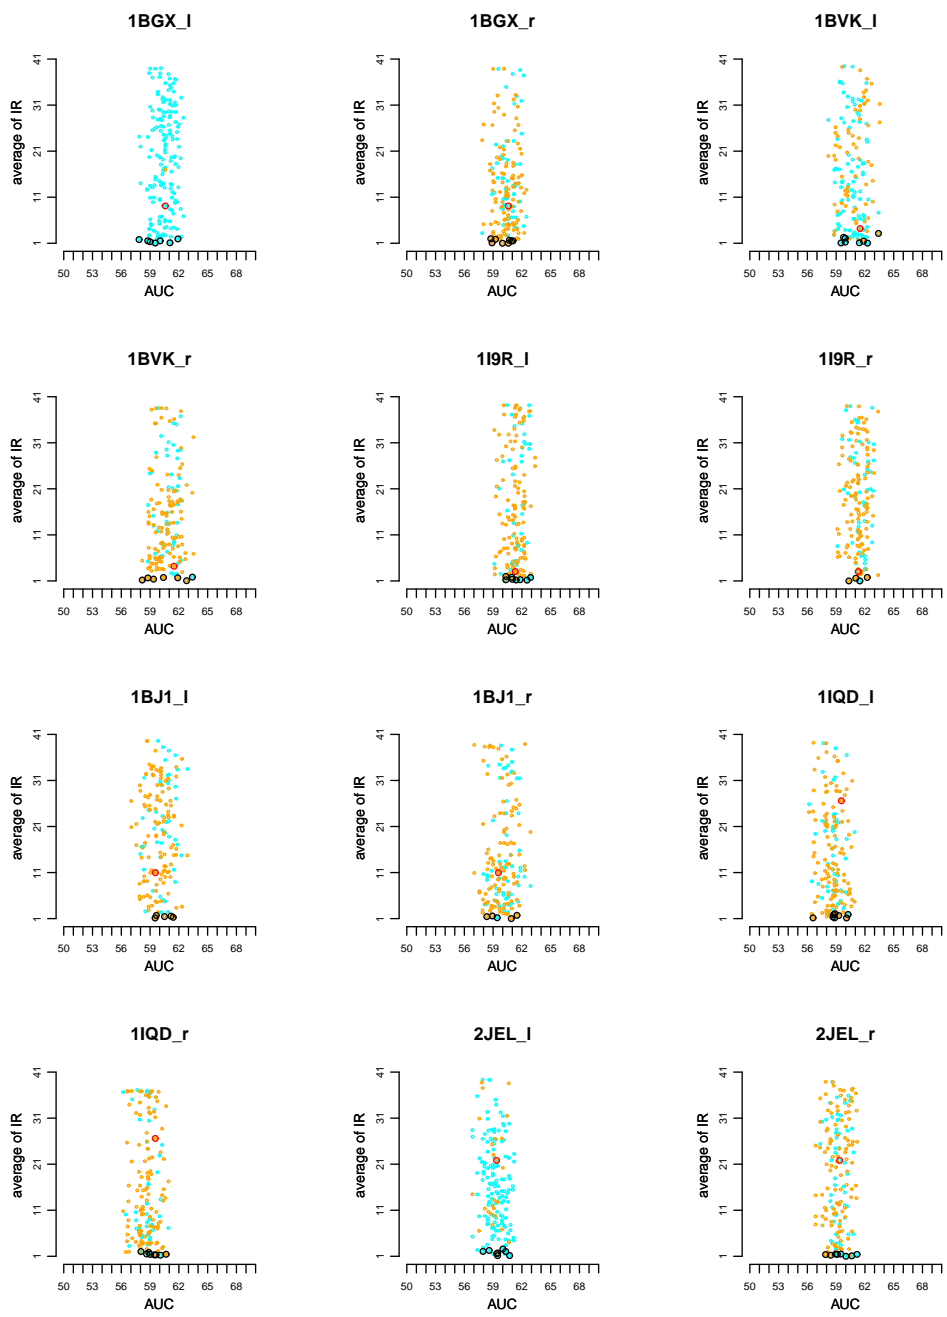

Figure S65: Species information associated to the IR analysis of false complexes against the true one reported in Fig. S38-S51. See legend in Fig. S60.

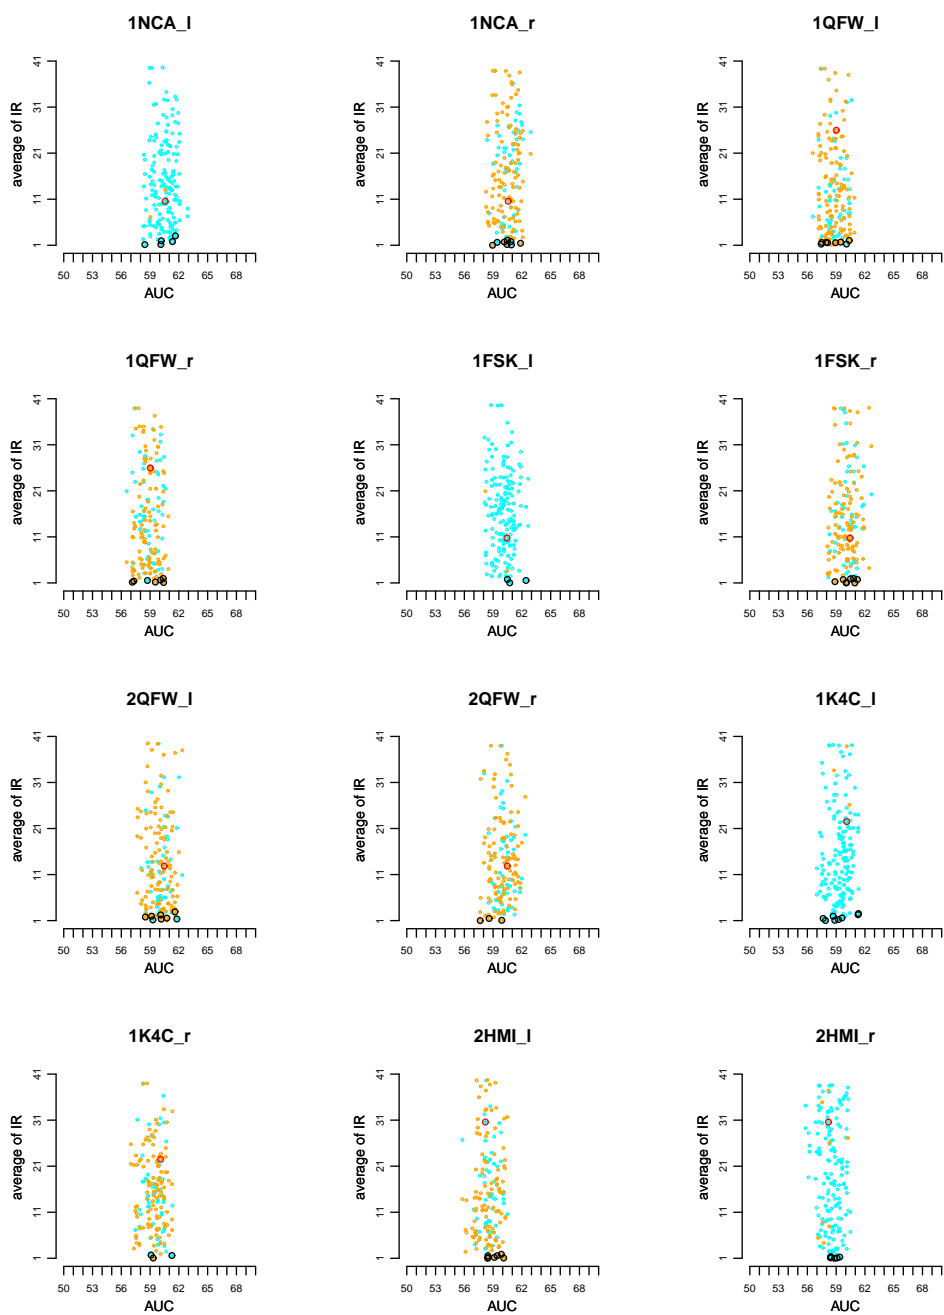

Figure S66: Species information associated to the IR analysis of false complexes against the true one reported in Fig. S38-S51. See legend in Fig. S60.

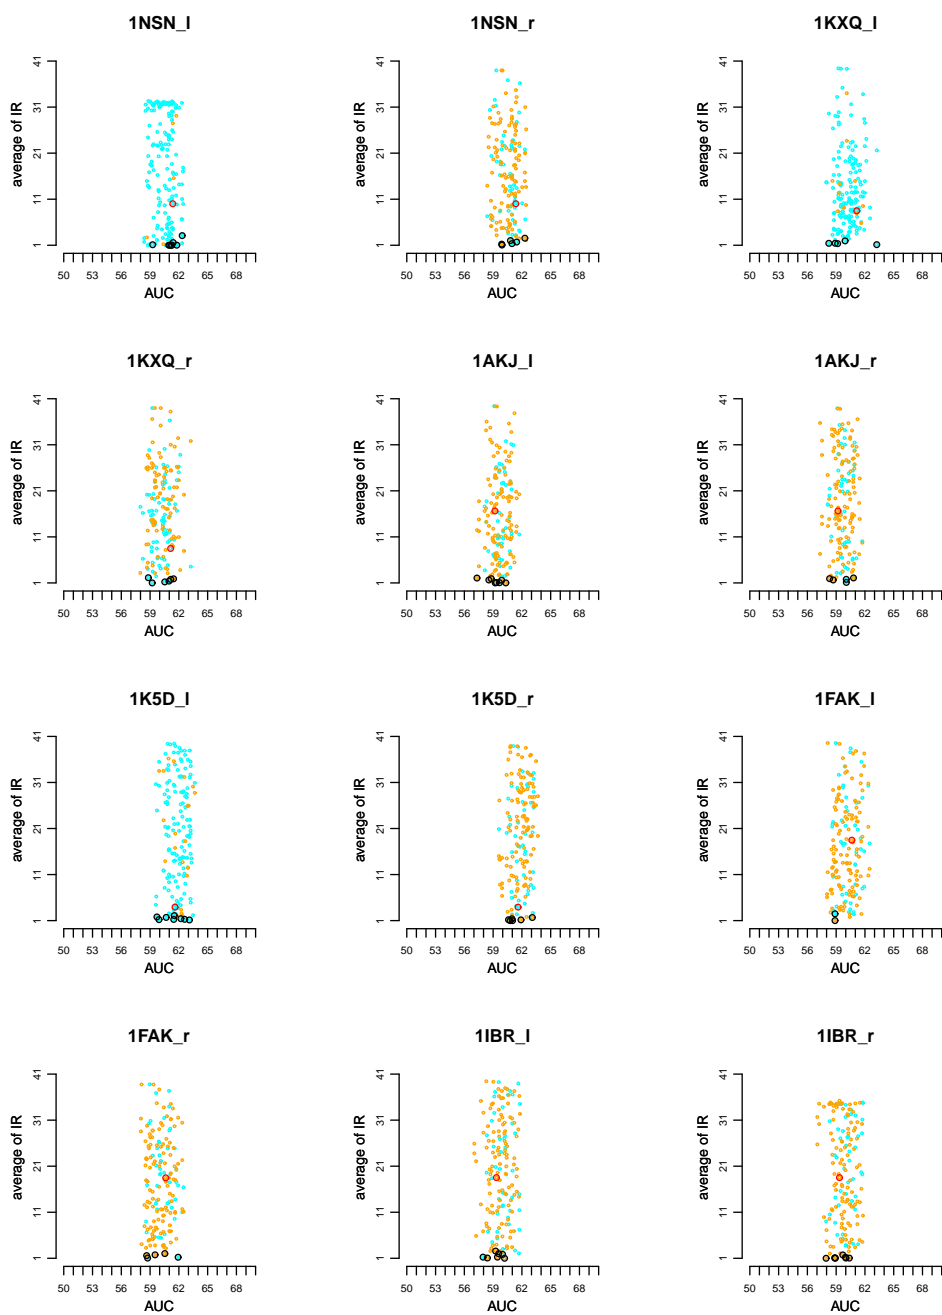

Figure S67: Species information associated to the IR analysis of false complexes against the true one reported in Fig. S38-S51. See legend in Fig. S60.

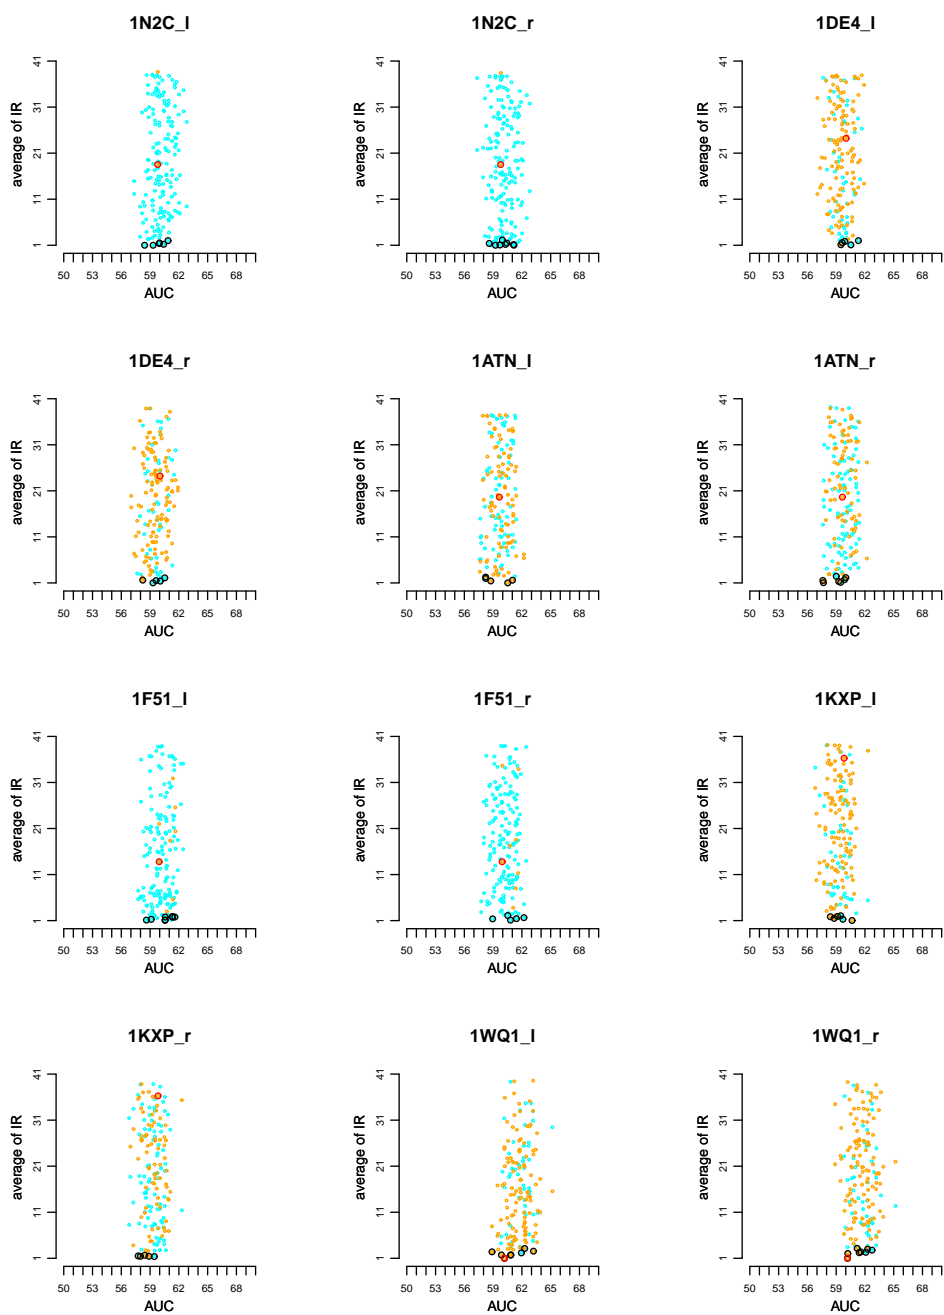

Figure S68: Species information associated to the IR analysis of false complexes against the true one reported in Fig. S38-S51. See legend in Fig. S60.

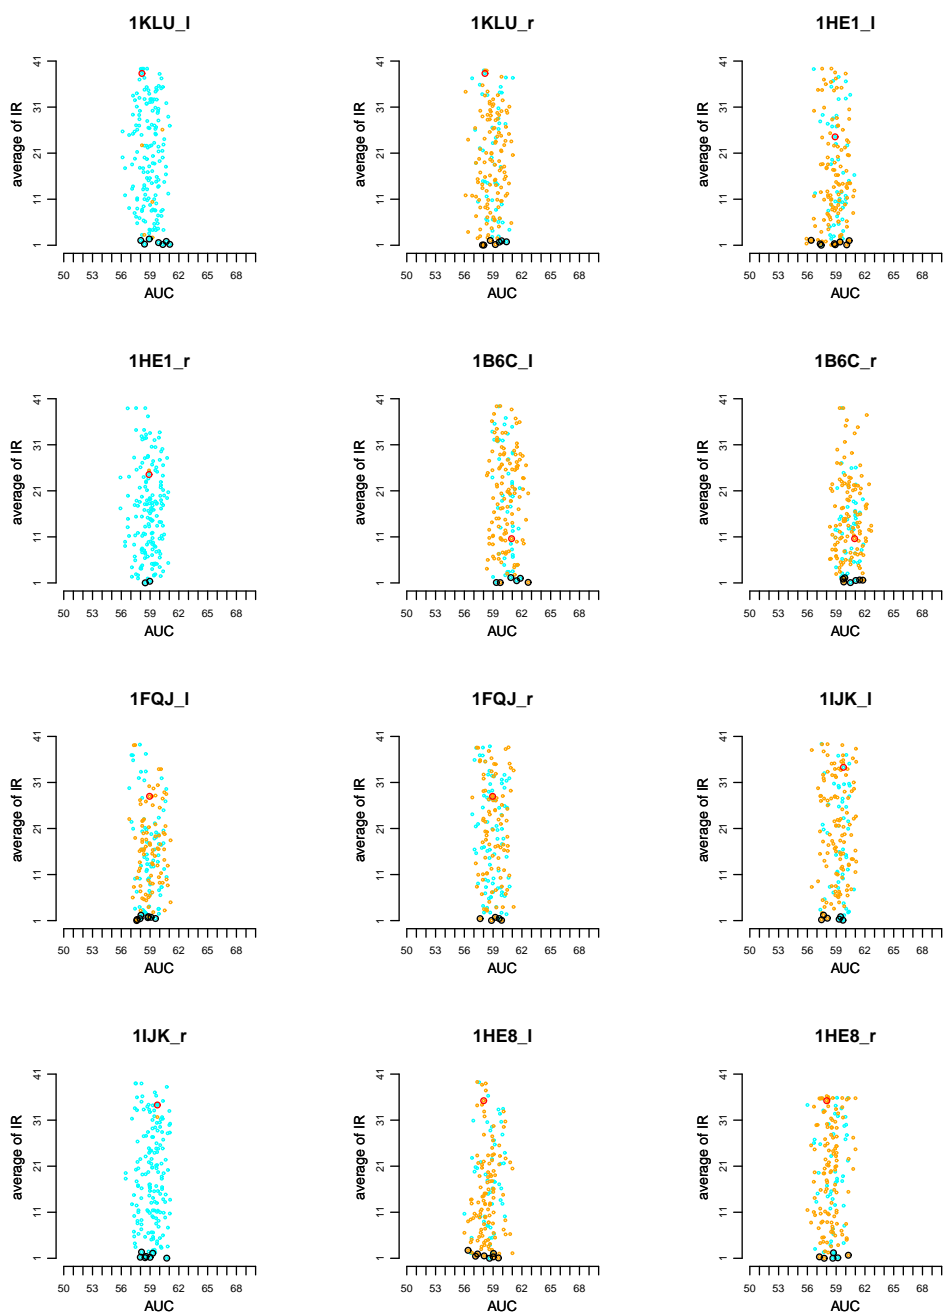

Figure S69: Species information associated to the IR analysis of false complexes against the true one reported in Fig. S38-S51. See legend in Fig. S60.

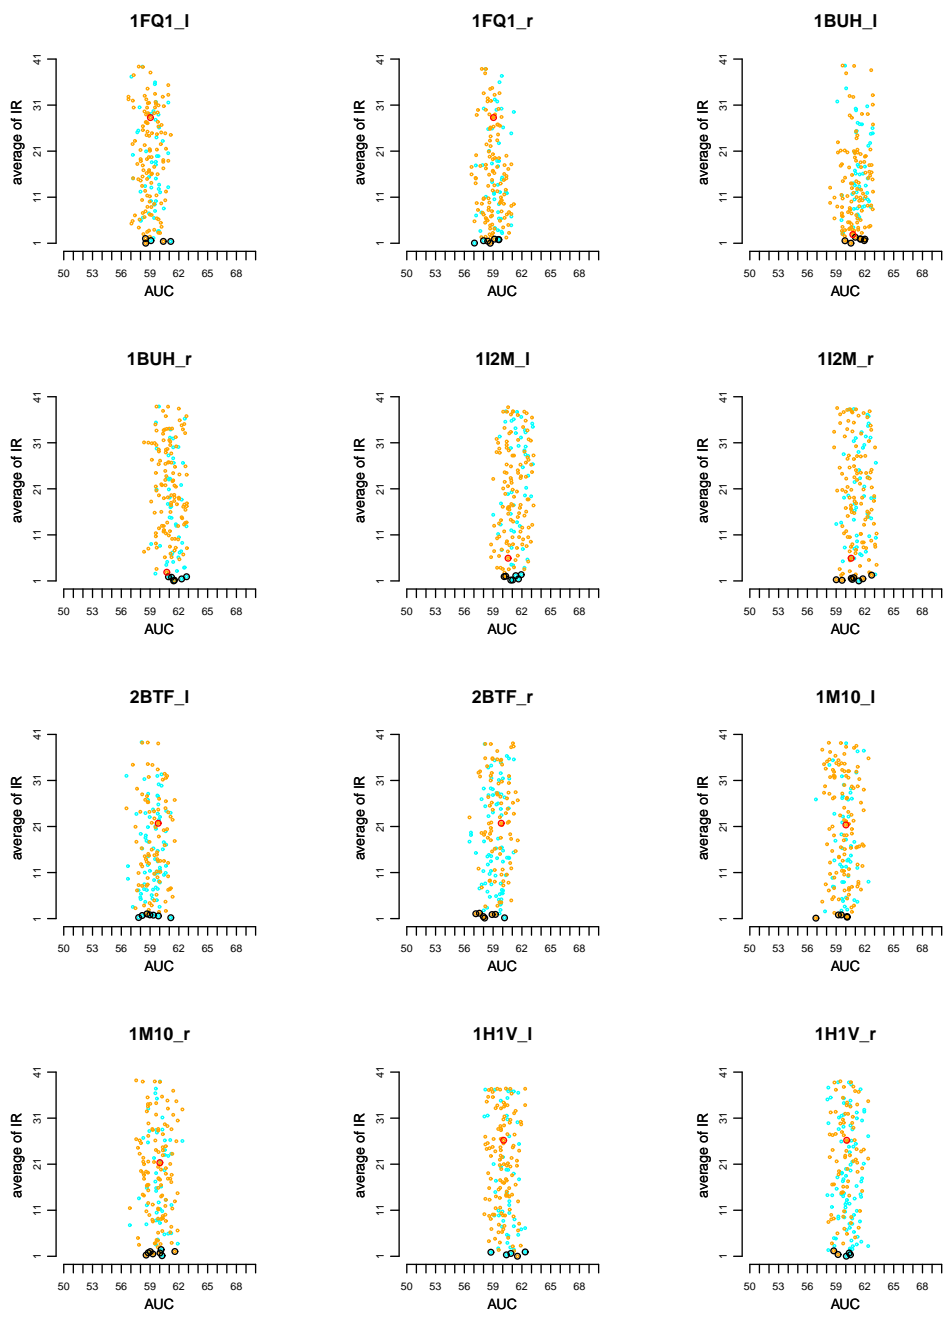

Figure S70: Species information associated to the IR analysis of false complexes against the true one reported in Fig. S38-S51. See legend in Fig. S60.

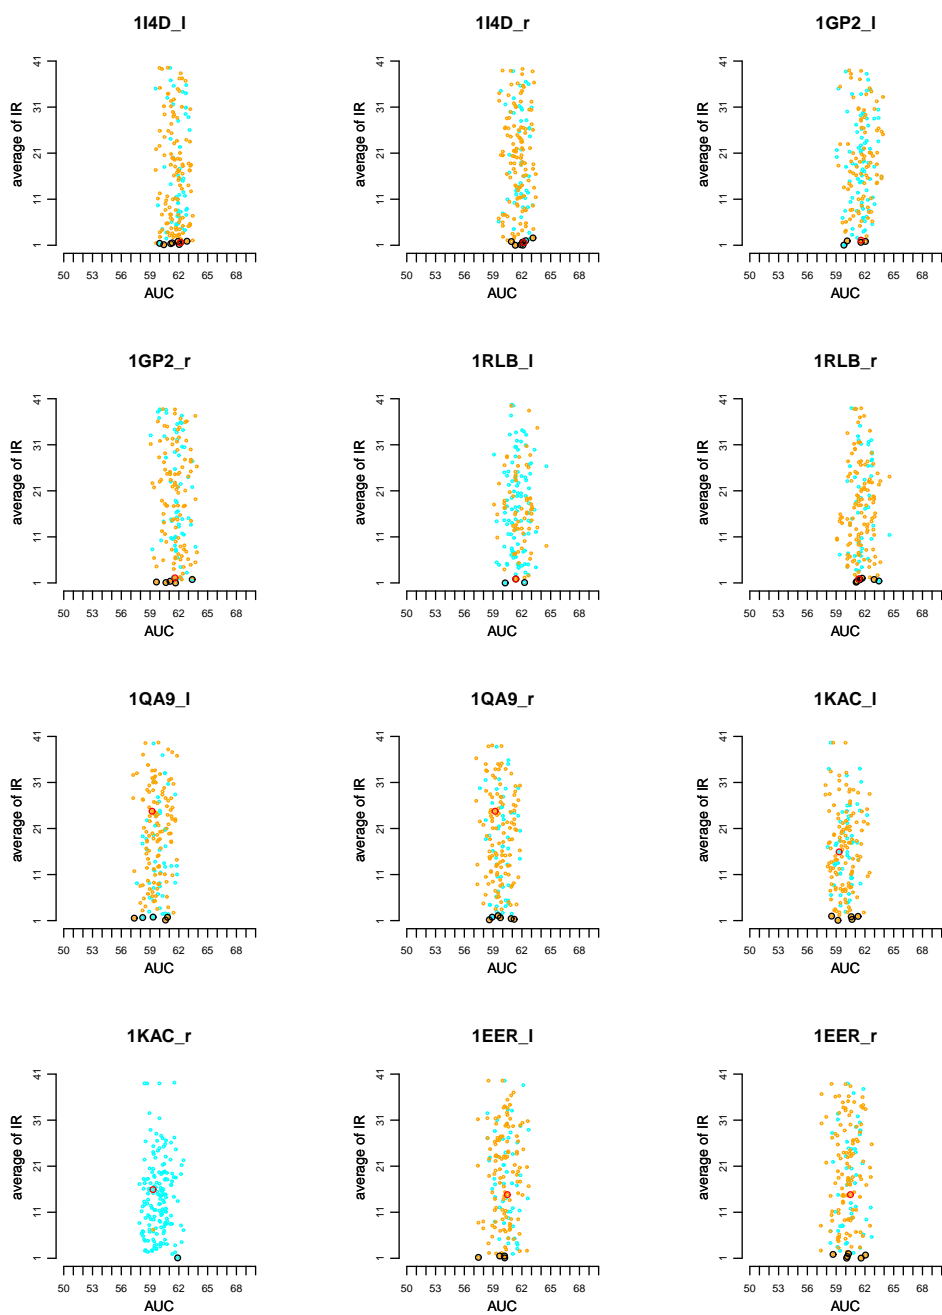

Figure S71: Species information associated to the IR analysis of false complexes against the true one reported in Fig. S38-S51. See legend in Fig. S60.

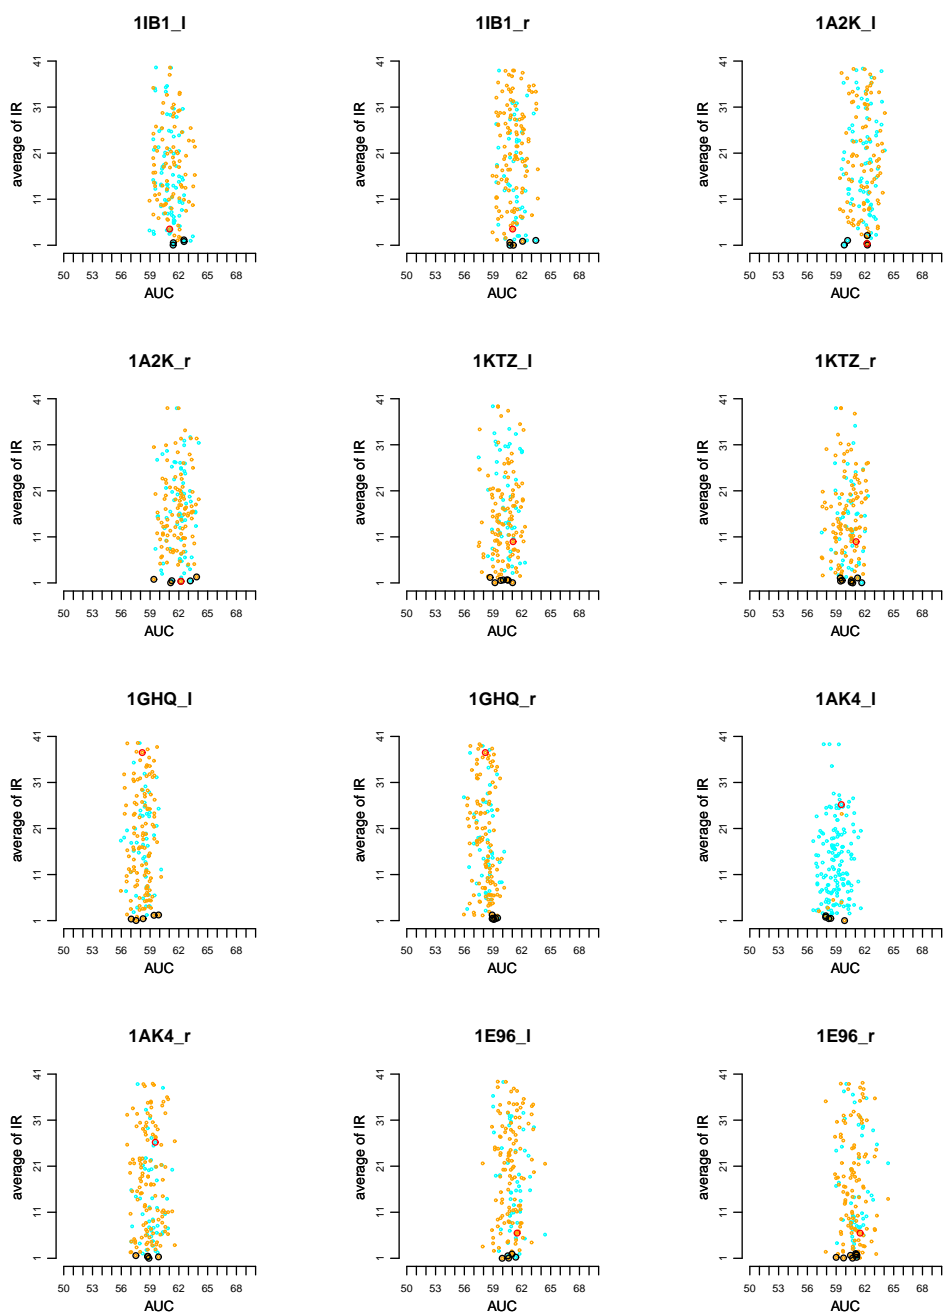

Figure S72: Species information associated to the IR analysis of false complexes against the true one reported in Fig. S38-S51. See legend in Fig. S60.



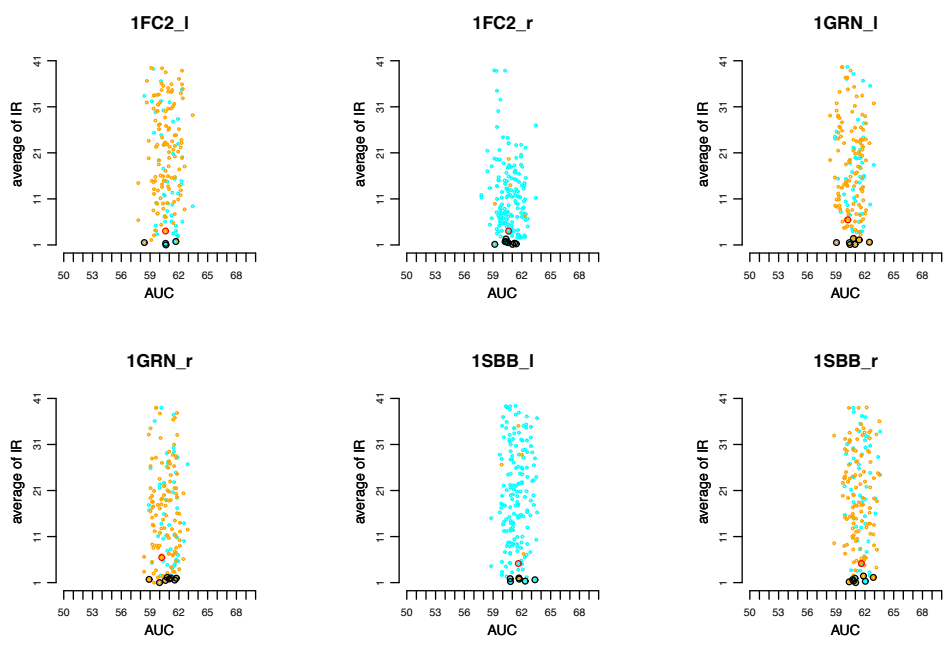

Figure S73: Species information associated to the IR analysis of false complexes against the true one reported in Fig. S38-S51. See legend in Fig. S60.

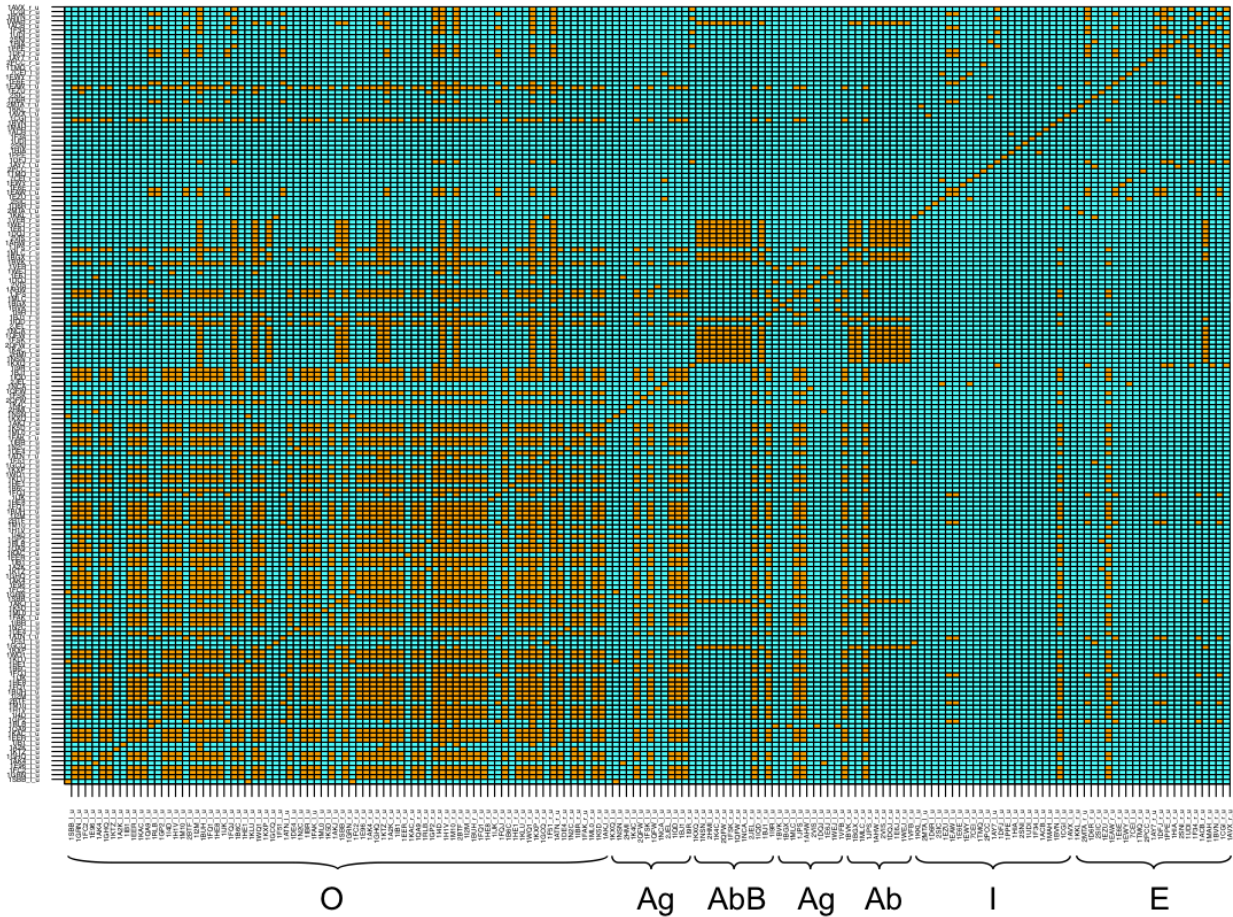

Figure S74: **Species represented in the Mintseris Benchmark 2.0 - homology defined at 100% of sequence identity.** Matrix reporting whether (orange) or not (cyan) any two protein structures of the Mintseris Benchmark 2.0 are represented by a common species at 100% sequence identity. Each line in the matrix represents a protein (see Methods). Proteins are ordered by classes: Others (O), Antibody (Ab), Bounded Antibody (AbB), Antigens (Ag), Inhibitors (I) and Enzymes (E). The *y*-axis follows the same order as the *x*-axis, from bottom to top. Compare to Fig. 7, Fig. S75 and Fig. S76.

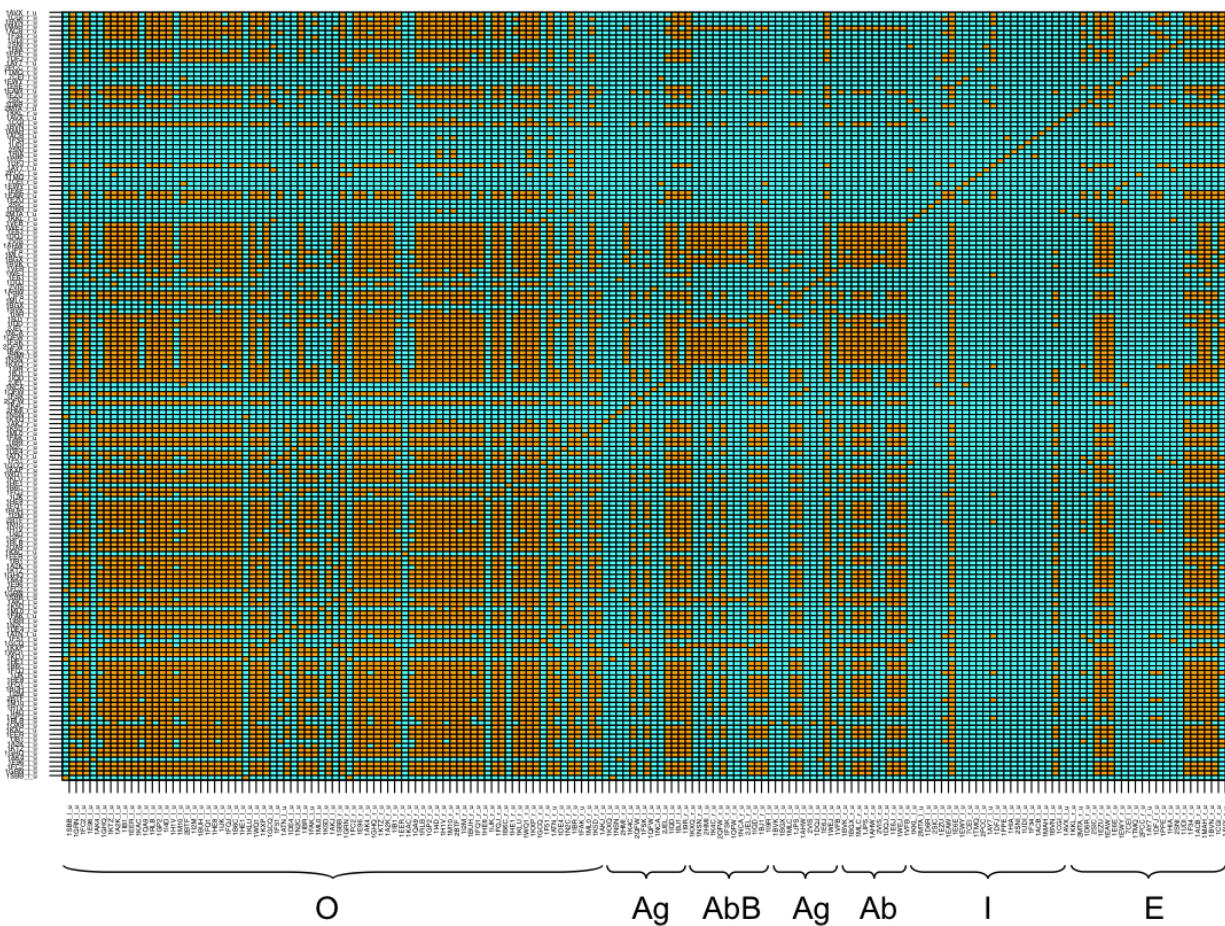

Figure S75: **Species represented in the Mintseris Benchmark 2.0 - homology defined at 80% of sequence identity.** Matrix reporting whether (orange) or not (cyan) any two protein structures of the Mintseris Benchmark 2.0 are represented by a common species at 80% sequence identity. Each line in the matrix represents a protein (see Methods). Proteins are ordered by classes: Others (O), Antibody (Ab), Bounded Antibody (AbB), Antigens (Ag), Inhibitors (I) and Enzymes (E). The *y*-axis follows the same order as the *x*-axis, from bottom to top. Compare to Fig. 7, Fig. S74 and Fig. S76.

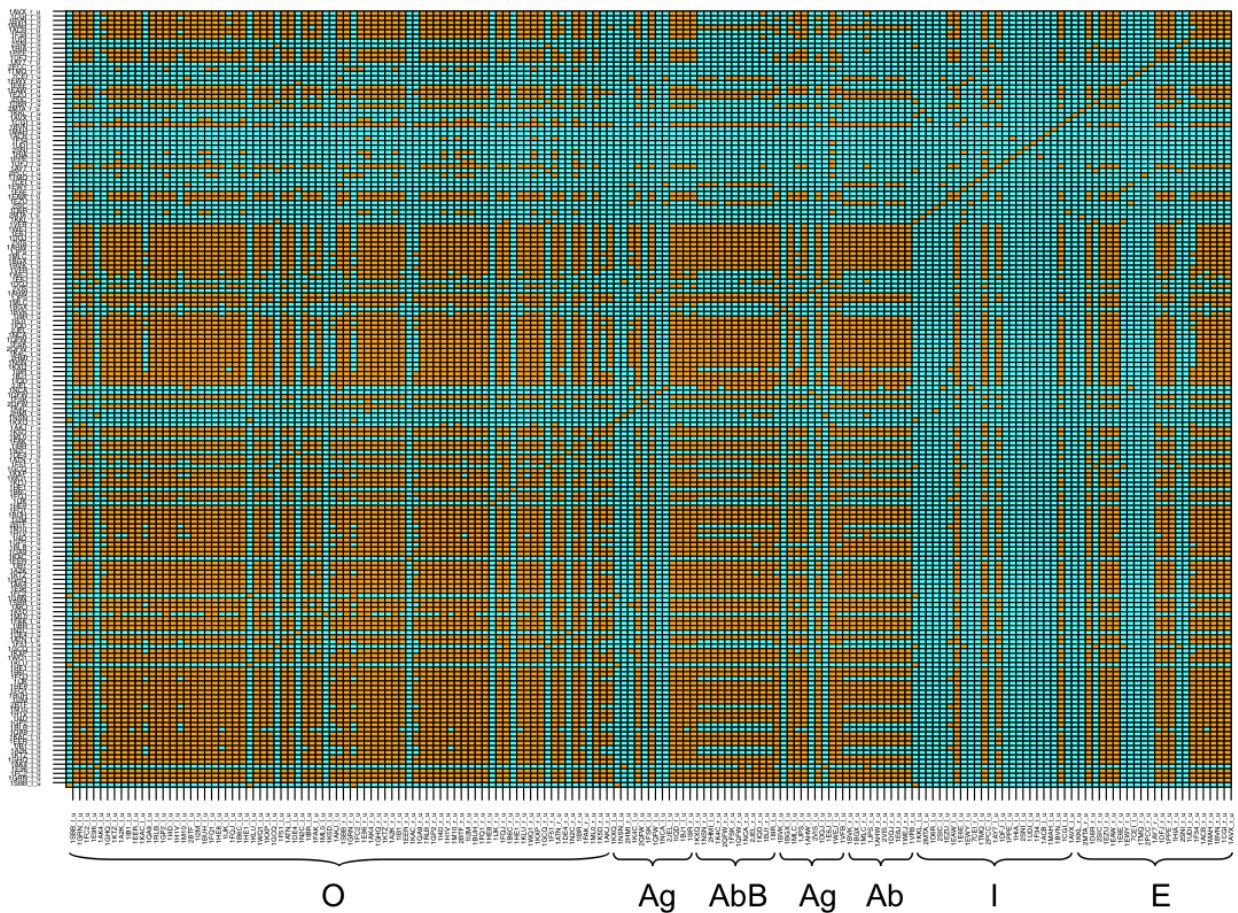

Figure S76: **Species represented in the Mintseris Benchmark 2.0 - homology defined at 60% of sequence identity.** Matrix reporting whether (orange) or not (cyan) any two protein structures of the Mintseris Benchmark 2.0 are represented by a common species at 80% sequence identity. Each line in the matrix represents a protein (see Methods). Proteins are ordered by classes: Others (O), Antibody (Ab), Bounded Antibody (AbB), Antigens (Ag), Inhibitors (I) and Enzymes (E). The  $y$ -axis follows the same order as the  $x$ -axis, from bottom to top. Compare to Fig. 7, Fig. S74 and Fig. S75.

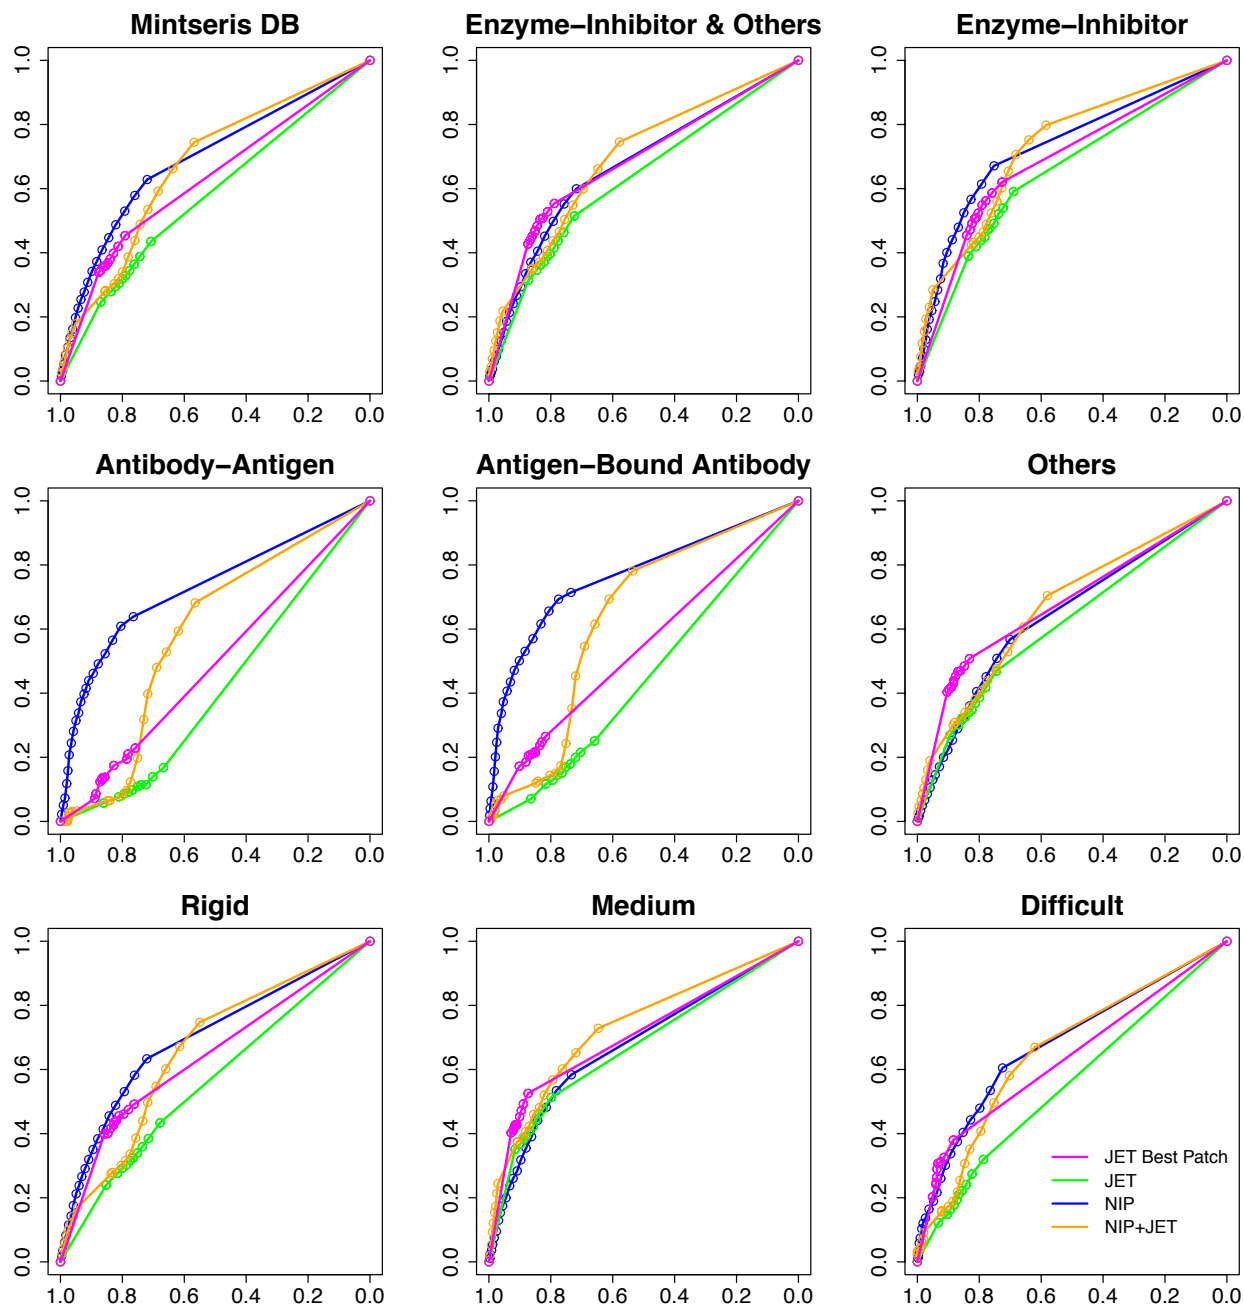

Figure S77: ROC curves reporting the ability of NIP or JET to predict interface residues on the Mintseris dataset and its different subsets. Specificity and sensitivity values are reported on the x-axis and y-axis respectively. Four scores are considered: JET Best Patch only, JET only, NIP only and NIP[0.4]+JET[0.6]. The JET Best Patch curve is obtained by considering only the patch that displays the highest coverage of the experimental interface's core, at each iteration of iJET. Score thresholds range from 0 to 1 by 0.05. See also SI Table S10.

| IR analysis of true complexes |            |                         |                 |                  |                      |                 |                  |
|-------------------------------|------------|-------------------------|-----------------|------------------|----------------------|-----------------|------------------|
| Protein dataset               |            | Experimental interfaces |                 |                  | Predicted interfaces |                 |                  |
| Subset type                   | #complexes | Max-Min $\leq 5$        | $\mu IR \leq 5$ | $\mu IR \leq 10$ | Max-Min $\leq 5$     | $\mu IR \leq 5$ | $\mu IR \leq 10$ |
| Mintseris DB                  | 84         | 41                      | 56              | 69               | 14                   | 24              | 41               |
| Enzyme-Inhibitor              | 23         | 12                      | 16              | 17               | 11                   | 11              | 19               |
| Antibody-Antigen              | 10         | 4                       | 6               | 9                | 3                    | 3               | 4                |
| Antigen-Bound Antibody        | 12         | 7                       | 8               | 11               | 1                    | 1               | 3                |
| Others                        | 39         | 18                      | 26              | 32               | 9                    | 9               | 14               |

Table S1: **IR analysis of true complexes in the Mintseris Benchmark 2.0.** For the analysis described by the plots in Fig. S10-S16 (relative to experimental interfaces) and Fig. S17-S23 (relative to predicted interfaces) we report the number of complexes displaying a variation of 5 between the minimum and maximum IR value, the number of complexes with an average IR value  $\leq 5$  and the number of complexes with an average IR value  $\leq 10$ . These values are reorganized with respect to functional classes of proteins (Enzyme-Inhibitor, Antibody-Antigen, Antigen-Bound Antibody and Others).

| Complex numbering | Complex name | Average IR |
|-------------------|--------------|------------|
| 1                 | 1WQ1         | 1.0        |
| 2                 | 1BVN         | 1.01       |
| 3                 | 1A2K         | 1.39       |
| 4                 | 1I4D         | 1.61       |
| 5                 | 1RLB         | 1.62       |
| 6                 | 1PPE         | 1.78       |
| 7                 | 1HIA         | 2.22       |
| 8                 | 1KKL         | 2.42       |
| 9                 | 1GP2         | 2.61       |
| 10                | 1EZU         | 2.66       |
| 11                | 1EWY         | 2.84       |
| 12                | 1BUH         | 2.93       |
| 13                | 1K5D         | 3.27       |
| 14                | 1I9R         | 3.49       |
| 15                | 1FC2         | 3.76       |
| 16                | 1F34         | 3.82       |
| 17                | 2SNI         | 4.12       |
| 18                | 1VFB         | 4.28       |
| 19                | 2SIC         | 4.42       |
| 20                | 1WEJ         | 4.44       |
| 21                | 1BVK         | 4.45       |
| 22                | 1IB1         | 4.46       |
| 23                | 1CGI         | 4.64       |
| 24                | 1E6E         | 4.77       |
| 25                | 1EAW         | 5.03       |
| 26                | 1SBB         | 5.13       |
| 27                | 7CEI         | 5.26       |
| 28                | 2MTA         | 5.34       |
| 29                | 1MAH         | 5.83       |
| 30                | 1I2M         | 5.87       |
| 31                | 1E96         | 6.19       |
| 32                | 1GRN         | 6.62       |
| 33                | 1TMQ         | 7.48       |
| 34                | 1KXQ         | 8.12       |
| 35                | 2PCC         | 8.63       |
| 36                | 1ACB         | 8.66       |
| 37                | 1BGX         | 8.98       |
| 38                | 1UDI         | 9.02       |
| 39                | 1NSN         | 9.77       |
| 40                | 1KTZ         | 9.81       |
| 41                | 1AY7         | 9.95       |
| 42                | 1B6C         | 10.42      |
| 43                | 1BJ1         | 10.46      |
| 44                | 1NCA         | 10.51      |
| 45                | 1FSK         | 11.11      |
| 46                | 1D6R         | 12.55      |
| 47                | 1F51         | 12.8       |
| 48                | 1AHW         | 12.88      |
| 49                | 2QFW         | 13.19      |
| 50                | 1E6J         | 13.38      |
| 51                | 1JPS         | 13.41      |
| 52                | 1EER         | 13.8       |
| 53                | 1DQJ         | 15.74      |
| 54                | 1AKJ         | 16.26      |
| 55                | 1KAC         | 17.29      |
| 56                | 1FAK         | 17.67      |
| 57                | 1N2C         | 18.1       |
| 58                | 1IBR         | 18.72      |
| 59                | 1AVX         | 18.77      |
| 60                | 1ATN         | 20.07      |
| 61                | 2BTF         | 21.17      |
| 62                | 2JEL         | 21.34      |
| 63                | 1M10         | 21.54      |
| 64                | 1K4C         | 22.41      |
| 65                | 1DE4         | 23.49      |
| 66                | 1QA9         | 23.51      |
| 67                | 1HE1         | 23.89      |
| 68                | 1QFW         | 25.74      |
| 69                | 1IQD         | 25.98      |
| 70                | 1AK4         | 26.1       |
| 71                | 1H1V         | 26.39      |
| 72                | 1FQ1         | 27.54      |
| 73                | 1FQJ         | 27.83      |
| 74                | 1MLC         | 29.11      |
| 75                | 2HMI         | 30.07      |
| 76                | 2VIS         | 30.38      |
| 77                | 1IJK         | 33.84      |
| 78                | 1HE8         | 35.04      |
| 79                | 1KXP         | 36.06      |
| 80                | 1GHQ         | 37.41      |
| 81                | 1KLU         | 38.1       |
| 82                | 1DFJ         | 38.73      |
| 83                | 1ML0         | 39.19      |
| 84                | 1GCQ         | 39.47      |

Table S2: **Coordinates of Figure 4** The complex numbering used in Figure 4 is reported with the name of the complex and the average rank.

| PDB    | Species                           | 100%  |       | 80%   |       | 60%   |       | PDB - partners                                                       |
|--------|-----------------------------------|-------|-------|-------|-------|-------|-------|----------------------------------------------------------------------|
|        |                                   | #homo | ratio | #homo | ratio | #homo | ratio |                                                                      |
| 1AVX_r | <i>Sus_scrofa</i>                 | 15    | 0.00  | 67    | 0.33  | 88    | 0.33  | 1E6E_l 1I2M_r                                                        |
| 1CGI_r | <i>Bos_taurus</i>                 | 21    | 0.00  | 69    | 0.60  | 90    | 0.60  | 1HE1_l 1HE8_l 1KTZ_r                                                 |
| 1BVN_r | <i>Sus_scrofa</i>                 | 15    | 0.00  | 67    | 0.00  | 88    | 0.40  | 1EAW_l 1GHQ_l                                                        |
| 1MAH_r | <i>Mus_musculus</i>               | 30    | 0.33  | 82    | 0.50  | 111   | 0.67  | 1CGI_l 1MLC_r 1IQD_l 1GCQ_l                                          |
| 1ACB_r | <i>Bos_taurus</i>                 | 21    | 0.00  | 69    | 0.67  | 90    | 0.67  | 1IBR_l 1KXP_l 1HE1_l 1I4D_l                                          |
| 1F34_r | <i>Sus_scrofa</i>                 | 15    | 0.00  | 67    | 0.29  | 88    | 0.57  | 1EAW_l 1WEJ_l 1IQD_l 1ML0_l                                          |
| 1UDI_r | <i>Human_herpesvirus_1</i>        | 1     | 0.00  | 1     | 0.00  | 1     | 0.00  |                                                                      |
| 2SNI_r | <i>Bacillus_amyloliquefaciens</i> | 3     | 0.00  | 5     | 0.00  | 6     | 0.00  |                                                                      |
| 1HIA_r | <i>Sus_scrofa</i>                 | 15    | 0.00  | 67    | 0.33  | 88    | 0.50  | 1WEJ_l 1IQD_l 1FQJ_r                                                 |
| 1PPE_r | <i>Bos_taurus</i>                 | 21    | 0.00  | 69    | 0.00  | 90    | 0.00  |                                                                      |
| 1DFJ_r | <i>Bos_taurus</i>                 | 21    | 0.20  | 69    | 0.20  | 90    | 0.20  | 1E6E_l                                                               |
| 1AY7_r | <i>Streptomyces_aureofaciens</i>  | 1     | 0.00  | 1     | 0.00  | 1     | 0.00  |                                                                      |
| 2PCC_r | <i>Saccharomyces_cerevisiae</i>   | 2     | 0.00  | 11    | 0.00  | 20    | 0.00  |                                                                      |
| 1TMQ_r | <i>Tenebrio_molitor</i>           | 1     | 0.00  | 1     | 0.00  | 1     | 0.00  |                                                                      |
| 7CEI_l | <i>Escherichia_coli</i>           | 4     | 0.00  | 6     | 0.00  | 25    | 0.17  | 1JPS_r                                                               |
| 1EWY_r | <i>Nostoc_sp.</i>                 | 2     | 0.00  | 2     | 0.00  | 3     | 0.00  |                                                                      |
| 1E6E_r | <i>Bos_taurus</i>                 | 21    | 0.00  | 69    | 0.33  | 90    | 0.33  | 1GCQ_l 1HE1_l                                                        |
| 1EAW_r | <i>Homo_sapiens</i>               | 67    | 0.75  | 94    | 0.75  | 118   | 1.00  | 1BGX_r 1QFW_l 2QFW_l 1GHQ_r                                          |
| 1EZU_r | <i>Rattus_norvegicus</i>          | 11    | 0.25  | 61    | 0.50  | 103   | 0.75  | 1DQJ_r 1I4D_l 1FC2_l                                                 |
| 2SIC_r | <i>Bacillus_amyloliquefaciens</i> | 3     | 0.00  | 5     | 0.00  | 6     | 0.00  |                                                                      |
| 1D6R_r | <i>Bos_taurus</i>                 | 21    | 0.00  | 69    | 0.50  | 90    | 0.50  | 1IBR_r 1I2M_r                                                        |
| 2MTA_r | <i>Paracoccus_denitrificans</i>   | 2     | 0.00  | 2     | 0.00  | 2     | 0.00  |                                                                      |
| 1KKL_r | <i>Lactobacillus_casei</i>        | 1     | 0.00  | 1     | 0.00  | 2     | 0.00  |                                                                      |
| 1AVX_l | <i>Glycine_max</i>                | 2     | 0.00  | 7     | 0.00  | 19    | 0.00  |                                                                      |
| 1CGI_l | <i>Homo_sapiens</i>               | 67    | 0.50  | 94    | 0.75  | 118   | 0.75  | 1MAH_r 1I9R_r 1K5D_r 1FAK_r<br>1DE4_l 1IB1_l                         |
| 1BVN_l | <i>Streptomyces_tendae</i>        | 1     | 0.00  | 1     | 0.00  | 1     | 0.00  |                                                                      |
| 1MAH_l | <i>Dendroaspis_angusticeps</i>    | 1     | 0.00  | 1     | 0.00  | 1     | 0.00  |                                                                      |
| 1ACB_l | <i>Hirudo_medicinalis</i>         | 2     | 0.00  | 6     | 0.00  | 7     | 0.00  |                                                                      |
| 1F34_l | <i>Ascaris_suum</i>               | 1     | 0.00  | 1     | 0.00  | 2     | 0.00  |                                                                      |
| 1UDI_l | <i>Bacillus_phage_PBS2</i>        | 1     | 0.00  | 1     | 0.00  | 1     | 0.00  |                                                                      |
| 2SNI_l | <i>Hordeum_vulgare</i>            | 1     | 0.00  | 7     | 0.00  | 19    | 0.12  | 1BUH_r                                                               |
| 1HIA_l | <i>Hirudo_medicinalis</i>         | 2     | 0.00  | 6     | 0.09  | 7     | 0.09  | 1H1V_r                                                               |
| 1PPE_l | <i>Cucurbita_maxima</i>           | 1     | 0.00  | 2     | 0.00  | 8     | 0.00  |                                                                      |
| 1DFJ_l | <i>Sus_scrofa</i>                 | 15    | 0.00  | 67    | 0.00  | 88    | 0.00  |                                                                      |
| 1AY7_l | <i>Bacillus_amyloliquefaciens</i> | 3     | 0.00  | 5     | 0.00  | 6     | 0.00  |                                                                      |
| 2PCC_l | <i>Saccharomyces_cerevisiae</i>   | 2     | 0.00  | 11    | 0.00  | 20    | 0.25  | 1HE8_l                                                               |
| 1TMQ_l | <i>Eleusine_coracana</i>          | 1     | 0.00  | 1     | 0.00  | 1     | 0.00  |                                                                      |
| 7CEI_r | <i>Escherichia_coli</i>           | 4     | 0.00  | 6     | 0.00  | 25    | 0.14  | 1IQD_r                                                               |
| 1EWY_l | <i>Nostoc_sp.</i>                 | 2     | 0.00  | 2     | 0.00  | 3     | 0.00  |                                                                      |
| 1E6E_l | <i>Bos_taurus</i>                 | 21    | 0.15  | 69    | 0.38  | 90    | 0.69  | 1AVX_r 1DFJ_r 1DQJ_l 1MLC_l<br>1BVK_l 2QFW_l 1FQJ_r 1EER_r<br>1GRN_l |
| 1EAW_l | <i>Bos_taurus</i>                 | 21    | 0.00  | 69    | 0.50  | 90    | 0.60  | 1BVN_r 1F34_r 1KXP_l 1KLU_r<br>1EER_l 1SBB_r<br>1IQD_r 2JEL_r        |
| 1EZU_l | <i>Escherichia_coli</i>           | 4     | 0.00  | 6     | 0.00  | 25    | 0.40  |                                                                      |
| 2SIC_l | <i>Streptomyces_albogriseolus</i> | 1     | 0.00  | 1     | 0.00  | 1     | 0.00  |                                                                      |
| 1D6R_l | <i>Glycine_max</i>                | 2     | 0.00  | 7     | 0.00  | 19    | 0.00  |                                                                      |
| 2MTA_l | <i>Paracoccus_denitrificans</i>   | 2     | 0.00  | 2     | 0.00  | 2     | 0.00  |                                                                      |
| 1KKL_l | <i>Bacillus_subtilis</i>          | 4     | 0.00  | 5     | 0.00  | 8     | 0.10  | 1B6C_r                                                               |
| 1VFB_r | <i>Mus_musculus</i>               | 30    | 0.29  | 82    | 0.57  | 111   | 0.57  | 1E6J_r 2VIS_r 1HE1_l 1GP2_r                                          |
| 1WEJ_r | <i>Mus_musculus</i>               | 30    | 0.00  | 82    | 0.40  | 111   | 1.00  | 1DQJ_l 1JPS_r 1BVK_l 1M10_l<br>1IB1_l                                |

Table S3: **Analysis of species representation among proteins of the Mintseris dataset.** For each protein structure  $P$  in the Mintseris dataset we report: the name of the protein structure (PDB), its species, two values for each one of the three analysis realized by considering homology at 100%, 80% and 60% sequence identity for the partners of  $P$  (see Methods). The first value (#homo) corresponds to the number of partners in the database that have a homolog of the same species, at  $X\%$  sequence identity from  $P$ , where  $X$  can be 100, 80 or 60. This value corresponds to the number of orange dots in the plots of Fig. S60-S73. The second number (ratio) is the proportion of orange dots among the black dots, that is the most likely partners of  $P$ . The last column lists the names of the protein partners among the most likely ones (black dots) that have an homolog of the same species as  $P$ .



| PDB    | Species                  | 100%  |       | 80%   |       | 60%   |       | PDB - partners                                                                                                           |
|--------|--------------------------|-------|-------|-------|-------|-------|-------|--------------------------------------------------------------------------------------------------------------------------|
|        |                          | #homo | ratio | #homo | ratio | #homo | ratio |                                                                                                                          |
| 1E6J_r | <i>Mus_musculus</i>      | 30    | 0.43  | 82    | 0.86  | 111   | 0.86  | 1VFB_r 2VIS_r 1JPS_r 1NCA_r<br>1K5D_r 1HE8_l                                                                             |
| 1DQJ_r | <i>Mus_musculus</i>      | 30    | 0.25  | 82    | 0.50  | 111   | 0.75  | 1EZU_r 1AHW_l 1I9R_l 2JEL_r<br>1FSK_r 1FAK_r                                                                             |
| 2VIS_r | <i>Mus_musculus</i>      | 30    | 0.44  | 82    | 0.62  | 111   | 1.00  | 1VFB_l 1VFB_r 1E6J_r 1DQJ_l<br>1MLC_l 1MLC_r 1BGX_r 1BVK_l<br>1I9R_r 1BJ1_r 1K4C_l 1KXP_r<br>1HE1_l 1EER_r 1E96_r 1GRN_r |
| 1AHW_r | <i>Mus_musculus</i>      | 30    | 0.29  | 82    | 0.43  | 111   | 0.71  | 1BGX_r 1BJ1_r 1KXQ_l 1ML0_l<br>1GP2_r                                                                                    |
| 1JPS_r | <i>Homo_sapiens</i>      | 67    | 0.23  | 94    | 0.31  | 118   | 0.54  | 1D6R_r 1VFB_l 1WEJ_r 1DQJ_l<br>1M10_l 1GHQ_l 1GRN_l                                                                      |
| 1MLC_r | <i>Mus_musculus</i>      | 30    | 0.44  | 82    | 0.67  | 111   | 0.78  | 1MAH_r 1DQJ_r 2VIS_r 1KXQ_l<br>1BUH_l 2BTF_l 1I4D_l                                                                      |
| 1BGX_r | <i>Mus_musculus</i>      | 30    | 0.25  | 82    | 0.75  | 111   | 0.88  | 1EAW_r 2VIS_r 1AHW_r 1I9R_r<br>1IQD_l 1H1V_l 1GHQ_r                                                                      |
| 1BVK_r | <i>Homo_sapiens</i>      | 67    | 0.57  | 94    | 0.71  | 118   | 0.86  | 2PCC_l 1IQD_r 1FAK_l 1HE1_l<br>1RLB_l 1GHQ_r                                                                             |
| 1VFB_l | <i>Gallus_gallus</i>     | 9     | 0.00  | 41    | 0.27  | 65    | 0.45  | 1BJ1_l 1ATN_l 1HE8_l 1E96_r<br>1GRN_r                                                                                    |
| 1WEJ_l | <i>Equus_caballus</i>    | 12    | 0.00  | 57    | 0.38  | 78    | 0.50  | 1HIA_r 1BJ1_l 1E96_r 1GRN_r                                                                                              |
| 1E6J_l | <i>HIV_1</i>             | 3     | 0.20  | 3     | 0.20  | 8     | 0.20  | 1AK4_l                                                                                                                   |
| 1DQJ_l | <i>Gallus_gallus</i>     | 9     | 0.00  | 41    | 0.25  | 65    | 0.31  | 1E6E_l 1HE8_l 1I2M_l 1KTZ_l<br>1E96_r                                                                                    |
| 2VIS_l | <i>Influenza_A_virus</i> | 2     | 0.00  | 2     | 0.00  | 2     | 0.00  |                                                                                                                          |
| 1AHW_l | <i>Homo_sapiens</i>      | 67    | 0.50  | 94    | 0.50  | 118   | 1.00  | 1DQJ_r 1NCA_r 1QA9_l 1GRN_r                                                                                              |
| 1JPS_l | <i>Homo_sapiens</i>      | 67    | 0.25  | 94    | 0.25  | 118   | 0.50  | 1BVK_l 1KTZ_r                                                                                                            |
| 1MLC_l | <i>Gallus_gallus</i>     | 9     | 0.12  | 41    | 0.25  | 65    | 0.38  | 1E6E_l 1ATN_r 1KAC_l                                                                                                     |
| 1BGX_l | <i>Thermus_aquaticus</i> | 1     | 0.00  | 1     | 0.00  | 1     | 0.00  |                                                                                                                          |
| 1BVK_l | <i>Gallus_gallus</i>     | 9     | 0.00  | 41    | 0.36  | 65    | 0.45  | 1BVN_r 1E6E_l 1BUH_l 1KAC_l<br>1E96_r                                                                                    |
| 1I9R_l | <i>Homo_sapiens</i>      | 67    | 0.14  | 94    | 0.29  | 118   | 0.43  | 1DQJ_r 2VIS_r 1FQJ_l 2BTF_l<br>1AK4_r 1GRN_l                                                                             |
| 1BJ1_r | <i>Mus_musculus</i>      | 30    | 0.60  | 82    | 0.60  | 111   | 0.80  | 2VIS_r 1WQ1_l 1M10_l 1GRN_r                                                                                              |
| 1IQD_r | <i>Homo_sapiens</i>      | 67    | 0.44  | 94    | 0.56  | 118   | 0.62  | 1E6E_l 1BVK_r 1KXQ_r 1ATN_l<br>1WQ1_l 1HE1_l 1HE8_l 1H1V_r<br>1I4D_l 1EER_l                                              |
| 2JEL_r | <i>Mus_musculus</i>      | 30    | 0.18  | 82    | 0.45  | 111   | 0.45  | 1DQJ_r 1IBR_r 2BTF_l 1GP2_r<br>1SBB_r                                                                                    |
| 1NCA_r | <i>Mus_musculus</i>      | 30    | 0.12  | 82    | 0.25  | 111   | 0.62  | 1E6J_r 1AHW_l 1EER_r 1IB1_l<br>1GHQ_l                                                                                    |
| 1QFW_r | <i>Mus_musculus</i>      | 30    | 0.14  | 82    | 0.86  | 111   | 0.86  | 1IQD_l 1FQJ_l 1I2M_r 1GP2_r<br>1A2K_l 1SBB_r                                                                             |
| 1FSK_r | <i>Mus_musculus</i>      | 30    | 0.25  | 82    | 0.75  | 111   | 0.75  | 1DQJ_r 1KXQ_r 1K5D_r 1HE1_l<br>1E96_r 1GRN_r                                                                             |
| 2QFW_r | <i>Mus_musculus</i>      | 30    | 0.00  | 82    | 0.33  | 111   | 1.00  | 1PPE_r 1KXP_l 1HE8_r                                                                                                     |
| 1K4C_r | <i>Mus_musculus</i>      | 30    | 0.00  | 82    | 0.33  | 111   | 0.33  | 1IBR_r                                                                                                                   |
| 2HML_l | <i>Mus_musculus</i>      | 30    | 0.14  | 82    | 0.57  | 111   | 1.00  | 1KXQ_l 1IBR_r 1WQ1_l 1I2M_r<br>1M10_l 1A2K_l 1FC2_l                                                                      |
| 1NSN_r | <i>Mus_musculus</i>      | 30    | 0.17  | 82    | 0.50  | 111   | 0.50  | 1IBR_r 1A2K_l 1GRN_r                                                                                                     |
| 1KXQ_r | <i>Sus_scrofa</i>        | 15    | 0.00  | 67    | 0.17  | 88    | 0.17  | 1GRN_r                                                                                                                   |
| 1I9R_r | <i>Homo_sapiens</i>      | 67    | 0.25  | 94    | 0.25  | 118   | 0.75  | 2VIS_r 1BGX_r 1BUH_l                                                                                                     |
| 1BJ1_l | <i>Homo_sapiens</i>      | 67    | 0.40  | 94    | 0.80  | 118   | 1.00  | 1VFB_l 1WEJ_l 1AKJ_l 1I2M_r<br>1GP2_r                                                                                    |
| 1IQD_l | <i>Homo_sapiens</i>      | 67    | 0.29  | 94    | 0.43  | 118   | 0.64  | 1MAH_r 1F34_r 1HIA_r 1QFW_r<br>1ATN_l 1KXP_r 1HE1_l 1JK_l<br>2BTF_r                                                      |
| 2JEL_l | <i>Escherichia_coli</i>  | 4     | 0.10  | 6     | 0.10  | 25    | 0.10  | 2JEL_l                                                                                                                   |
| 1NCA_l | <i>Influenza_A_virus</i> | 2     | 0.00  | 2     | 0.00  | 2     | 0.00  |                                                                                                                          |
| 1QFW_l | <i>Homo_sapiens</i>      | 67    | 0.73  | 94    | 0.82  | 118   | 0.82  | 1E6E_l 1EAW_r 1FAK_r 1DE4_r<br>1ATN_r 1HE1_l 2BTF_r 1M10_r<br>1E96_r                                                     |

Table S4: Analysis of species distribution among proteins of the Mintseris dataset. Continued; see legend of Fig. S3.

| PDB    | Species                       | 100%  |       | 80%   |       | 60%   |       | PDB - partners                                                                            |
|--------|-------------------------------|-------|-------|-------|-------|-------|-------|-------------------------------------------------------------------------------------------|
|        |                               | #homo | ratio | #homo | ratio | #homo | ratio |                                                                                           |
| 1FSK_l | <i>Betula_pendula</i>         | 1     | 0.00  | 1     | 0.00  | 2     | 0.00  |                                                                                           |
| 2QFW_l | <i>Homo_sapiens</i>           | 67    | 0.73  | 94    | 0.82  | 118   | 0.82  | 1EAW_r 1E6J_r 1FAK_r 1ATN_r<br>1WQ1_l 1HE1_l 2BTF_r 1M10_r<br>1E96_r                      |
| 1K4C_l | <i>Streptomyces_lividans</i>  | 1     | 0.00  | 1     | 0.00  | 3     | 0.00  |                                                                                           |
| 2HML_r | <i>HIV_1</i>                  | 3     | 0.00  | 3     | 0.00  | 8     | 0.00  |                                                                                           |
| 1NSN_l | <i>Staphylococcus_aureus</i>  | 4     | 0.07  | 4     | 0.07  | 5     | 0.07  | 1FC2_r                                                                                    |
| 1KXQ_l | <i>Camelus_dromedarius</i>    | 1     | 0.00  | 8     | 0.00  | 11    | 0.00  |                                                                                           |
| 1AKJ_r | <i>Homo_sapiens</i>           | 67    | 0.40  | 94    | 0.40  | 118   | 0.40  | 1HE1_l 1FQ1_r                                                                             |
| 1K5D_r | <i>Homo_sapiens</i>           | 67    | 0.33  | 94    | 0.67  | 118   | 0.83  | 1E6J_r 1FSK_r 1KXQ_l 1B6C_r<br>1KTZ_r                                                     |
| 1ML0_r | <i>Murid_herpesvirus_4</i>    | 1     | 0.00  | 1     | 0.00  | 1     | 0.00  |                                                                                           |
| 1FAK_r | <i>Homo_sapiens</i>           | 67    | 0.40  | 94    | 0.40  | 118   | 0.60  | 1DQJ_r 1QFW_l 2QFW_l                                                                      |
| 1IBR_r | <i>Homo_sapiens</i>           | 67    | 0.25  | 94    | 0.38  | 118   | 0.88  | 1D6R_r 2JEL_r 1K4C_r 2HML_l<br>1NSN_r 1IB1_r 1A2K_r                                       |
| 1N2C_r | <i>Azotobacter_vinelandii</i> | 2     | 0.00  | 2     | 0.00  | 2     | 0.00  |                                                                                           |
| 1DE4_r | <i>Homo_sapiens</i>           | 67    | 0.20  | 94    | 0.20  | 118   | 0.20  | 1QFW_l                                                                                    |
| 1ATN_r | <i>Oryctolagus_cuniculus</i>  | 9     | 0.14  | 59    | 0.14  | 79    | 0.57  | 1MLC_l 1QFW_l 2QFW_l 1B6C_r                                                               |
| 1F51_r | <i>Bacillus_subtilis</i>      | 4     | 0.00  | 5     | 0.00  | 8     | 0.00  |                                                                                           |
| 1GCQ_r | <i>Homo_sapiens</i>           | 67    | 0.00  | 94    | 0.00  | 118   | 0.00  |                                                                                           |
| 1KXP_r | <i>Oryctolagus_cuniculus</i>  | 9     | 0.20  | 59    | 0.40  | 79    | 0.60  | 1IQD_l 1ML0_l 1KTZ_r                                                                      |
| 1WQ1_r | <i>Homo_sapiens</i>           | 67    | 0.38  | 94    | 0.50  | 118   | 0.50  | 1WQ1_l 1GCQ_l 1HE8_l 1M10_r                                                               |
| 1KLU_r | <i>Homo_sapiens</i>           | 67    | 0.29  | 94    | 0.43  | 118   | 0.57  | 1ML0_l 1IBR_r 1FQJ_l 1FC2_r                                                               |
| 1HE1_r | <i>Pseudomonas_aeruginosa</i> | 1     | 0.00  | 1     | 0.00  | 1     | 0.00  |                                                                                           |
| 1B6C_r | <i>Homo_sapiens</i>           | 67    | 0.71  | 94    | 0.71  | 118   | 0.71  | 1K5D_r 1IBR_l 1ATN_r 1EER_r<br>1GRN_r                                                     |
| 1FQJ_r | <i>Bos_taurus</i>             | 21    | 0.20  | 69    | 0.60  | 90    | 0.80  | 1HIA_r 1E6E_l 1HE8_l 1KTZ_l                                                               |
| 1IJK_r | <i>Bothrops_jararaca</i>      | 1     | 0.00  | 1     | 0.00  | 1     | 0.00  |                                                                                           |
| 1HE8_r | <i>Homo_sapiens</i>           | 67    | 0.17  | 94    | 0.33  | 118   | 0.50  | 2QFW_r 1FQJ_l 1A2K_r                                                                      |
| 1FQ1_r | <i>Homo_sapiens</i>           | 67    | 0.43  | 94    | 0.43  | 118   | 0.43  | 1I9R_l 1AKJ_r 1IBR_l                                                                      |
| 1BUH_r | <i>Homo_sapiens</i>           | 67    | 0.00  | 94    | 0.00  | 118   | 0.17  | 1FC2_r                                                                                    |
| 1I2M_r | <i>Homo_sapiens</i>           | 67    | 0.38  | 94    | 0.38  | 118   | 0.88  | 1AVX_r 1D6R_r 1BJ1_l 1QFW_r<br>2HML_l 1FQ1_l 1A2K_r                                       |
| 2BTF_r | <i>Bos_taurus</i>             | 21    | 0.00  | 69    | 0.43  | 90    | 0.86  | 1IQD_l 1QFW_l 2QFW_l 1ML0_l<br>1KTZ_r 1AK4_r                                              |
| 1M10_r | <i>Homo_sapiens</i>           | 67    | 0.62  | 94    | 0.62  | 118   | 0.62  | 1QFW_l 2QFW_l 1ML0_l 1WQ1_r<br>1QA9_r                                                     |
| 1H1V_r | <i>Oryctolagus_cuniculus</i>  | 9     | 0.00  | 59    | 0.00  | 79    | 0.40  | 1IQD_r 1ML0_l                                                                             |
| 1I4D_r | <i>Homo_sapiens</i>           | 67    | 0.50  | 94    | 0.50  | 118   | 0.62  | 1I4D_l 1ATN_l 1WQ1_l 1HE8_l<br>1E96_r                                                     |
| 1GP2_r | <i>Rattus_norvegicus</i>      | 11    | 0.00  | 61    | 0.20  | 103   | 0.80  | 1AHW_r 1BJ1_l 2JEL_r 1QFW_r                                                               |
| 1RLB_r | <i>Homo_sapiens</i>           | 67    | 0.43  | 94    | 0.57  | 118   | 0.57  | 1RLB_l 1B6C_l 1I4D_l 1KAC_l                                                               |
| 1QA9_r | <i>Homo_sapiens</i>           | 67    | 0.67  | 94    | 0.67  | 118   | 0.83  | 1HE1_l 1M10_r 1I4D_l 1E96_r<br>1SBB_r                                                     |
| 1KAC_r | <i>Human_adenovirus_12</i>    | 1     | 0.00  | 1     | 0.00  | 1     | 0.00  |                                                                                           |
| 1EER_r | <i>Homo_sapiens</i>           | 67    | 0.50  | 94    | 0.67  | 118   | 1.00  | 1E6E_l 2VIS_r 1NCA_r 1WQ1_l<br>1B6C_r 1BUH_l                                              |
| 1IB1_r | <i>Homo_sapiens</i>           | 67    | 0.40  | 94    | 0.40  | 118   | 0.60  | 1IBR_r 1BUH_l 1SBB_r                                                                      |
| 1A2K_r | <i>Rattus_norvegicus</i>      | 11    | 0.00  | 61    | 0.67  | 103   | 0.67  | 1A2K_l 1IBR_r 1HE8_r 1I2M_r                                                               |
| 1KTZ_r | <i>Homo_sapiens</i>           | 67    | 0.50  | 94    | 0.62  | 118   | 0.75  | 1CGI_r 1HIA_r 1JPS_l 1K5D_r<br>1KXP_r 2BTF_r                                              |
| 1GHQ_r | <i>Homo_sapiens</i>           | 67    | 0.50  | 94    | 0.50  | 118   | 0.67  | 1EAW_r 1BGX_r 1BVK_r 1I4D_l                                                               |
| 1AK4_r | <i>Homo_sapiens</i>           | 67    | 0.60  | 94    | 0.60  | 118   | 0.80  | 1I9R_l 1ATN_l 1IJK_l 1EER_l                                                               |
| 1E96_r | <i>Homo_sapiens</i>           | 67    | 0.46  | 94    | 0.62  | 118   | 0.92  | 1VFB_l 1DQJ_l 2VIS_r 1BVK_l<br>1QFW_l 1FSK_r 2QFW_l 1I4D_r<br>1GP2_l 1QA9_r 1GHQ_r 1GRN_l |
| 1FC2_r | <i>Staphylococcus_aureus</i>  | 4     | 0.12  | 4     | 0.12  | 5     | 0.12  | 1NSN_l                                                                                    |
| 1GRN_r | <i>Homo_sapiens</i>           | 67    | 0.27  | 94    | 0.55  | 118   | 0.82  | 1VFB_l 1WEJ_l 2VIS_r 1AHW_l<br>1BJ1_r 1NSN_r 1KXQ_r 1B6C_r<br>1FQ1_l                      |

Table S5: Analysis of species distribution among proteins of the Mintseris dataset. Continued; see legend of Fig. S3.

| PDB    | Species                          | 100%  |       | 80%   |       | 60%   |       | PDB - partners                                                                                                  |
|--------|----------------------------------|-------|-------|-------|-------|-------|-------|-----------------------------------------------------------------------------------------------------------------|
|        |                                  | #homo | ratio | #homo | ratio | #homo | ratio |                                                                                                                 |
| 1SBB_r | <i>Mus_musculus</i>              | 30    | 0.38  | 82    | 0.62  | 111   | 0.62  | 2JEL_r 1QFW_r 1B6C_l 1I4D_l 1IB1_r                                                                              |
| 1AKJ_l | <i>Homo_sapiens</i>              | 67    | 0.50  | 94    | 0.50  | 118   | 0.75  | 1BJ1_l 1NCA_r 1NSN_r 1KXP_l 1HE8_r 1EER_l                                                                       |
| 1K5D_l | <i>Schizosaccharomyces_pombe</i> | 1     | 0.00  | 9     | 0.00  | 20    | 0.00  |                                                                                                                 |
| 1ML0_l | <i>Homo_sapiens</i>              | 67    | 0.67  | 94    | 0.75  | 118   | 0.75  | 1AHW_r 1KXP_r 1KLU_r 1IJK_l 1I2M_l 2BTF_r 1M10_r 1H1V_r 1EER_l                                                  |
| 1FAK_l | <i>Homo_sapiens</i>              | 67    | 0.00  | 94    | 0.00  | 118   | 0.50  | 2JEL_r                                                                                                          |
| 1IBR_l | <i>Homo_sapiens</i>              | 67    | 0.43  | 94    | 0.71  | 118   | 0.71  | 1ACB_r 1E6J_r 1B6C_r 1FQ1_r 1E96_l                                                                              |
| 1N2C_l | <i>Azotobacter_vinelandii</i>    | 2     | 0.00  | 2     | 0.00  | 2     | 0.00  |                                                                                                                 |
| 1DE4_l | <i>Homo_sapiens</i>              | 67    | 0.20  | 94    | 0.20  | 118   | 0.20  | 1CGI_l                                                                                                          |
| 1ATN_l | <i>Bos_taurus</i>                | 21    | 0.20  | 69    | 0.60  | 90    | 0.80  | 1VFB_l 1IQD_l 1I4D_r 1AK4_r                                                                                     |
| 1F51_l | <i>Bacillus_subtilis</i>         | 4     | 0.00  | 5     | 0.00  | 8     | 0.00  |                                                                                                                 |
| 1GCQ_l | <i>Mus_musculus</i>              | 30    | 0.25  | 82    | 0.38  | 111   | 0.75  | 1MAH_r 1ACB_r 1E6E_r 2QFW_l 1B6C_l 1FC2_l                                                                       |
| 1KXP_l | <i>Homo_sapiens</i>              | 67    | 0.17  | 94    | 0.50  | 118   | 0.67  | 1ACB_r 2QFW_r 1AKJ_l 1RLB_l                                                                                     |
| 1WQ1_l | <i>Homo_sapiens</i>              | 67    | 0.50  | 94    | 0.62  | 118   | 0.75  | 1WQ1_r 1BJ1_r 2HMI_l 1I4D_r 1EER_r 1GHQ_l                                                                       |
| 1KLU_l | <i>Staphylococcus_aureus</i>     | 4     | 0.00  | 4     | 0.00  | 5     | 0.00  |                                                                                                                 |
| 1HE1_l | <i>Homo_sapiens</i>              | 67    | 0.53  | 94    | 0.88  | 118   | 0.94  | 1CGI_r 1ACB_r 1E6E_r 1VFB_r 2VIS_r 1BVK_r 1IQD_r 1QFW_l 1FSK_r 2QFW_l 1AKJ_r 1I4D_r 1GP2_l 1QA9_r 1KAC_l 1GHQ_l |
| 1B6C_l | <i>Homo_sapiens</i>              | 67    | 0.17  | 94    | 0.33  | 118   | 0.33  | 1GCQ_l 1RLB_r                                                                                                   |
| 1FQJ_l | <i>Bos_taurus</i>                | 21    | 0.00  | 69    | 0.38  | 90    | 0.38  | 1KLU_r 1HE8_r 1EER_l                                                                                            |
| 1IJK_l | <i>Homo_sapiens</i>              | 67    | 0.50  | 94    | 0.50  | 118   | 0.50  | 1IQD_l 1ML0_l 1AK4_r                                                                                            |
| 1HE8_l | <i>Homo_sapiens</i>              | 67    | 0.38  | 94    | 0.62  | 118   | 0.92  | 1CGI_r 2PCC_l 1VFB_l 1E6J_r 1DQJ_l 1MLC_l 1IQD_r 1WQ1_r 1FQJ_r 1I4D_r 1AK4_r 1GRN_l                             |
| 1FQ1_l | <i>Homo_sapiens</i>              | 67    | 0.60  | 94    | 0.60  | 118   | 0.60  | 1DE4_r 1I2M_r 1GRN_r                                                                                            |
| 1BUH_l | <i>Homo_sapiens</i>              | 67    | 0.71  | 94    | 0.86  | 118   | 1.00  | 1MLC_r 1BVK_l 1I9R_r 1H1V_l 1EER_r 1IB1_r 1E96_l                                                                |
| 1I2M_l | <i>Homo_sapiens</i>              | 67    | 0.14  | 94    | 0.14  | 118   | 0.29  | 1DQJ_l 1ML0_l                                                                                                   |
| 2BTF_l | <i>Bos_taurus</i>                | 21    | 0.00  | 69    | 0.14  | 90    | 0.14  | 1EER_l                                                                                                          |
| 1M10_l | <i>Homo_sapiens</i>              | 67    | 0.40  | 94    | 0.80  | 118   | 1.00  | 1WEJ_r 1JPS_r 1BJ1_r 2HMI_l 1KTZ_l                                                                              |
| 1H1V_l | <i>Homo_sapiens</i>              | 67    | 0.00  | 94    | 0.00  | 118   | 0.20  | 1BGX_r                                                                                                          |
| 1I4D_l | <i>Homo_sapiens</i>              | 67    | 0.45  | 94    | 0.73  | 118   | 0.91  | 1I4D_r 1ACB_r 1EZU_r 1MLC_r 1IQD_r 1NSN_r 1QA9_r 1KAC_l 1GHQ_r 1SBB_r                                           |
| 1GP2_l | <i>Bos_taurus</i>                | 21    | 0.00  | 69    | 0.50  | 90    | 0.75  | 2PCC_l 1HE1_l 1E96_r                                                                                            |
| 1RLB_l | <i>Gallus_gallus</i>             | 9     | 0.00  | 41    | 0.00  | 65    | 0.33  | 1RLB_r                                                                                                          |
| 1QA9_l | <i>Homo_sapiens</i>              | 67    | 0.20  | 94    | 0.60  | 118   | 0.60  | 1E6E_l 1AHW_l 1MLC_r                                                                                            |
| 1KAC_l | <i>Homo_sapiens</i>              | 67    | 0.60  | 94    | 0.60  | 118   | 1.00  | 1MLC_l 1BVK_l 1HE1_l 1I4D_l 1RLB_r                                                                              |
| 1EER_l | <i>Homo_sapiens</i>              | 67    | 1.00  | 94    | 1.00  | 118   | 1.00  | 1IQD_r 1AKJ_l 1ML0_l 1AK4_r                                                                                     |
| 1IB1_l | <i>Ovis_aries</i>                | 7     | 0.00  | 65    | 0.00  | 85    | 0.00  |                                                                                                                 |
| 1A2K_l | <i>Canis_lupus</i>               | 9     | 0.20  | 64    | 0.20  | 90    | 0.20  | 1A2K_r                                                                                                          |
| 1KTZ_l | <i>Homo_sapiens</i>              | 67    | 0.43  | 94    | 0.57  | 118   | 0.86  | 2PCC_l 1DQJ_l 1QFW_l 1FQJ_r 1M10_l 1E96_l                                                                       |
| 1GHQ_l | <i>Homo_sapiens</i>              | 67    | 0.60  | 94    | 0.80  | 118   | 1.00  | 1BVN_r 1JPS_r 1NCA_r 1WQ1_l 1HE1_l                                                                              |
| 1AK4_l | <i>HIV_1</i>                     | 3     | 0.20  | 3     | 0.20  | 8     | 0.60  | 1E6J_l 1JPS_r 1I9R_l                                                                                            |
| 1E96_l | <i>Homo_sapiens</i>              | 67    | 0.60  | 94    | 0.60  | 118   | 0.60  | 1IBR_l 1BUH_l 1KTZ_l                                                                                            |
| 1FC2_l | <i>Homo_sapiens</i>              | 67    | 0.00  | 94    | 0.00  | 118   | 0.25  | 2HMI_l                                                                                                          |
| 1GRN_l | <i>Homo_sapiens</i>              | 67    | 0.71  | 94    | 0.86  | 118   | 0.86  | 1E6E_l 1JPS_r 1I9R_l 1ATN_r 1HE8_l 1E96_r                                                                       |
| 1SBB_l | <i>Staphylococcus_aureus</i>     | 4     | 0.00  | 4     | 0.00  | 5     | 0.17  | 1KKL_l                                                                                                          |

Table S6: Analysis of species distribution among proteins of the Mintseris dataset. Continued; see legend of Fig. S3.

| <b>HEX parameterization</b> |              |
|-----------------------------|--------------|
| <b>Parameter</b>            | <b>Value</b> |
| RECEPTOR_RANGE_ANGLE        | 180          |
| LIGAND_RANGE_ANGLE          | 180          |
| TWIST_RANGE_ANGLE           | 360          |
| DOCKING_R12_RANGE           | 40           |
| DOCKING_R12_STEP            | 0.75         |
| DOCKING_R12.SUBSTEPS        | 2            |
| MAX_DOCKING_SOLUTIONS       | 3000         |
| MAX_DOCKING_CLUSTERS        | 2000         |
| DOCKING_CLUSTER_WINDOW      | 200          |
| DOCKING_CLUSTER_THRESHOLD   | 3            |
| DOCKING_CLUSTER_MODE        | 1            |
| DOCKING_CORRELATION         | 0            |
| DOCKING_MAIN_SCAN           | 18           |
| DOCKING_MAIN_SEARCH         | 25           |

Table S7: Parameters used for HEX CC-D computation.

| Evaluation of partner prediction based on experimental interfaces |            |      |     |     |      |    |     |
|-------------------------------------------------------------------|------------|------|-----|-----|------|----|-----|
| NII score threshold = 0.4                                         |            |      |     |     |      |    |     |
| Subset Type                                                       | # proteins | AUC  | Sen | Spe | Prec | F1 | MCC |
| Mintseris DB                                                      | 168        | 0.84 | 65  | 86  | 3    | 5  | 11  |
| Enzyme-Inhibitors & Others                                        | 124        | 0.84 | 64  | 85  | 4    | 7  | 12  |
| Enzyme-Inhibitors                                                 | 46         | 0.85 | 63  | 81  | 7    | 13 | 16  |
| Antibody-Antigens                                                 | 20         | 0.89 | 100 | 50  | 10   | 17 | 22  |
| Antibody-bound Antigens                                           | 24         | 0.91 | 96  | 68  | 12   | 21 | 27  |
| Others                                                            | 78         | 0.84 | 72  | 82  | 5    | 9  | 15  |
| Rigid                                                             | 126        | 0.87 | 76  | 84  | 4    | 7  | 14  |
| Medium                                                            | 26         | 0.85 | 88  | 71  | 11   | 19 | 25  |
| Difficult                                                         | 16         | 0.77 | 69  | 67  | 12   | 21 | 18  |
| Mono (both partners)                                              | 86         | 0.87 | 76  | 82  | 5    | 9  | 16  |
| Multi (at least one partner)                                      | 82         | 0.81 | 71  | 79  | 4    | 8  | 13  |
| NII score threshold = 0.5                                         |            |      |     |     |      |    |     |
| Mintseris DB                                                      | 168        | 0.84 | 52  | 92  | 4    | 7  | 12  |
| Enzyme-Inhibitors & Others                                        | 124        | 0.84 | 54  | 92  | 5    | 9  | 15  |
| Enzyme-Inhibitors                                                 | 46         | 0.85 | 59  | 88  | 10   | 17 | 20  |
| Antibody-Antigens                                                 | 20         | 0.89 | 95  | 66  | 13   | 23 | 28  |
| Antibody-bound Antigens                                           | 24         | 0.91 | 79  | 80  | 15   | 25 | 28  |
| Others                                                            | 78         | 0.84 | 62  | 89  | 7    | 12 | 18  |
| Rigid                                                             | 126        | 0.87 | 59  | 91  | 5    | 9  | 15  |
| Medium                                                            | 26         | 0.85 | 73  | 81  | 13   | 22 | 25  |
| Difficult                                                         | 16         | 0.77 | 69  | 78  | 17   | 28 | 26  |
| Mono (both partners)                                              | 86         | 0.87 | 66  | 89  | 7    | 12 | 19  |
| Multi (at least one partner)                                      | 82         | 0.81 | 59  | 88  | 6    | 10 | 15  |
| NII score threshold = 0.6                                         |            |      |     |     |      |    |     |
| Mintseris DB                                                      | 168        | 0.84 | 43  | 96  | 6    | 10 | 14  |
| Enzyme-Inhibitors & Others                                        | 124        | 0.84 | 47  | 95  | 8    | 13 | 17  |
| Enzyme-Inhibitors                                                 | 46         | 0.85 | 52  | 93  | 14   | 22 | 24  |
| Antibody-Antigens                                                 | 20         | 0.89 | 75  | 77  | 15   | 25 | 26  |
| Antibody-bound Antigens                                           | 24         | 0.91 | 71  | 86  | 18   | 29 | 31  |
| Others                                                            | 78         | 0.84 | 49  | 94  | 9    | 15 | 19  |
| Rigid                                                             | 126        | 0.87 | 47  | 95  | 7    | 11 | 16  |
| Medium                                                            | 26         | 0.85 | 62  | 88  | 17   | 26 | 27  |
| Difficult                                                         | 16         | 0.77 | 62  | 82  | 19   | 29 | 27  |
| Mono (both partners)                                              | 86         | 0.87 | 52  | 94  | 9    | 15 | 20  |
| Multi (at least one partner)                                      | 82         | 0.81 | 45  | 93  | 7    | 13 | 16  |

Table S8: **Evaluation of partner identification prediction based on experimental interfaces.** The evaluation is realized at different NII score thresholds: 0.4, 0.5 and 0.6. Recall that the NII score threshold defines the set of predicted interacting complexes (that is, true and false positives, TP+FP). We use five standard measures of performance: sensitivity  $Sen = TP/(TP + FN)$ , specificity  $Spe = TN/(TN + FP)$ , precision or positive predictive value  $Prec = TP/(TP + FP)$ , balanced  $F$ -score  $F1 = 2 \cdot \frac{Prec \cdot Sen}{Prec + Sen}$  and Matthews correlation coefficient  $MCC = (TP \cdot TN - FP \cdot FN)/K$  where  $K = \sqrt{(TP + FP)(TP + FN)(TN + FP)(TN + FN)}$ .

| Evaluation of partner prediction based on predicted interfaces (JET+NIP) |            |      |     |     |      |    |     |
|--------------------------------------------------------------------------|------------|------|-----|-----|------|----|-----|
| NII score threshold = 0.15                                               |            |      |     |     |      |    |     |
| Subset Type                                                              | # proteins | AUC  | Sen | Spe | Prec | F1 | MCC |
| Mintseris DB *                                                           | 168        | 0.61 | 35  | 80  | 1    | 2  | 3   |
| Enzyme-Inhibitors & Others *                                             | 124        | 0.66 | 43  | 77  | 2    | 3  | 4   |
| Enzyme-Inhibitors                                                        | 46         | 0.77 | 76  | 66  | 4    | 8  | 10  |
| Antibody-Antigens                                                        | 20         | 0.58 | 20  | 57  | 2    | 4  | -10 |
| Antibody-bound Antigens                                                  | 24         | 0.56 | 50  | 65  | 6    | 10 | 7   |
| Others *                                                                 | 78         | 0.61 | 37  | 79  | 2    | 4  | 5   |
| Rigid *                                                                  | 126        | 0.60 | 37  | 74  | 1    | 2  | 2   |
| Medium                                                                   | 26         | 0.68 | 58  | 71  | 7    | 13 | 12  |
| Difficult                                                                | 16         | 0.65 | 38  | 75  | 9    | 15 | 7   |
| Mono (both partners)                                                     | 86         | 0.63 | 47  | 74  | 2    | 4  | 5   |
| Multi (at least one partner)                                             | 80         | 0.61 | 42  | 77  | 2    | 4  | 5   |
| NII score threshold = 0.20                                               |            |      |     |     |      |    |     |
| Mintseris DB *                                                           | 168        | 0.61 | 32  | 85  | 1    | 3  | 4   |
| Enzyme-Inhibitors & Others *                                             | 124        | 0.66 | 39  | 83  | 2    | 4  | 5   |
| Enzyme-Inhibitors                                                        | 46         | 0.77 | 70  | 73  | 4    | 8  | 11  |
| Antibody-Antigens                                                        | 20         | 0.58 | 15  | 66  | 2    | 4  | -9  |
| Antibody-bound Antigens                                                  | 24         | 0.56 | 46  | 71  | 6    | 11 | 7   |
| Others *                                                                 | 78         | 0.61 | 30  | 84  | 3    | 5  | 5   |
| Rigid *                                                                  | 126        | 0.60 | 30  | 81  | 1    | 2  | 3   |
| Medium                                                                   | 26         | 0.68 | 58  | 76  | 9    | 15 | 15  |
| Difficult                                                                | 16         | 0.65 | 38  | 78  | 10   | 16 | 9   |
| Mono (both partners)                                                     | 86         | 0.63 | 38  | 80  | 2    | 4  | 5   |
| Multi (at least one partner)                                             | 80         | 0.61 | 36  | 82  | 3    | 5  | 5   |
| NII score threshold = 0.25                                               |            |      |     |     |      |    |     |
| Mintseris DB *                                                           | 168        | 0.61 | 25  | 89  | 1    | 3  | 4   |
| Enzyme-Inhibitors & Others *                                             | 124        | 0.66 | 34  | 87  | 2    | 4  | 6   |
| Enzyme-Inhibitors                                                        | 46         | 0.77 | 65  | 78  | 5    | 9  | 12  |
| Antibody-Antigens                                                        | 20         | 0.58 | 15  | 70  | 3    | 4  | -7  |
| Antibody-bound Antigens                                                  | 24         | 0.56 | 38  | 74  | 6    | 10 | 5   |
| Others *                                                                 | 78         | 0.61 | 25  | 88  | 3    | 5  | 4   |
| Rigid *                                                                  | 126        | 0.60 | 29  | 85  | 2    | 3  | 4   |
| Medium                                                                   | 26         | 0.68 | 58  | 80  | 10   | 18 | 18  |
| Difficult                                                                | 16         | 0.65 | 38  | 80  | 11   | 17 | 10  |
| Mono (both partners)                                                     | 86         | 0.63 | 36  | 85  | 3    | 5  | 6   |
| Multi * (at least one partner)                                           | 80         | 0.61 | 32  | 86  | 3    | 5  | 6   |

Table S9: **Evaluation of partner identification prediction based on predicted interfaces (JET+NIP)**. We report three analyses realized at three different NII score thresholds (0.15, 0.20 and 0.25). Thresholds are used to define the set of predicted interacting complexes (that is, true and false positives, TP+FP). We use the five standard measures of performance defined in the legend of SI Table. S8. For each analysis, performance is evaluated on different categories of the Mintseris dataset: functional, difficulty and multimeric vs monomeric complexes. The \* symbol refers to values computed on subsets that have been cleaned of the complex 1ML0 for which JET provided no interaction site.

| Evaluation of the performance of binding sites predictions |            |     |     |      |    |     |
|------------------------------------------------------------|------------|-----|-----|------|----|-----|
| NIP[0.4]+JET[0.6] - score threshold of 0.5                 |            |     |     |      |    |     |
| Subset Type                                                | # proteins | Sen | Spe | Prec | F1 | MCC |
| Mintseris DB *                                             | 166        | 30  | 83  | 25   | 31 | 13  |
| Enzyme-Inhibitors & Others *                               | 122        | 37  | 84  | 31   | 37 | 20  |
| Enzyme-Inhibitors                                          | 46         | 45  | 80  | 41   | 42 | 26  |
| Antibody-Antigens                                          | 20         | 8   | 80  | 5    | 9  | -10 |
| Antibody-bound Antigens                                    | 24         | 14  | 80  | 10   | 15 | -3  |
| Others *                                                   | 76         | 32  | 86  | 25   | 33 | 17  |
| Rigid *                                                    | 124        | 30  | 80  | 24   | 30 | 11  |
| Medium                                                     | 26         | 39  | 89  | 34   | 39 | 26  |
| Difficult                                                  | 16         | 17  | 90  | 18   | 25 | 8   |
| NIP - score threshold of 0.5                               |            |     |     |      |    |     |
| Mintseris DB *                                             | 166        | 28  | 92  | 37   | 37 | 22  |
| Enzyme-Inhibitors & Others *                               | 122        | 24  | 92  | 35   | 35 | 19  |
| Enzyme-Inhibitors                                          | 46         | 28  | 93  | 50   | 38 | 27  |
| Antibody-Antigens                                          | 20         | 37  | 93  | 45   | 57 | 33  |
| Antibody-bound Antigens                                    | 24         | 41  | 94  | 45   | 48 | 36  |
| Others *                                                   | 76         | 20  | 92  | 26   | 30 | 13  |
| Rigid *                                                    | 124        | 29  | 92  | 38   | 40 | 23  |
| Medium                                                     | 26         | 24  | 93  | 35   | 31 | 20  |
| Difficult                                                  | 16         | 22  | 94  | 27   | 26 | 16  |
| JET - score threshold of 0.5                               |            |     |     |      |    |     |
| Mintseris DB *                                             | 166        | 33  | 79  | 23   | 30 | 12  |
| Enzyme-Inhibitors & Others *                               | 122        | 40  | 80  | 29   | 35 | 18  |
| Enzyme-Inhibitors                                          | 46         | 48  | 77  | 38   | 42 | 24  |
| Antibody-Antigens                                          | 20         | 11  | 75  | 6    | 11 | -10 |
| Antibody-bound Antigens                                    | 24         | 17  | 75  | 9    | 14 | -5  |
| Others *                                                   | 76         | 35  | 82  | 23   | 30 | 15  |
| Rigid *                                                    | 124        | 32  | 76  | 22   | 29 | 9   |
| Medium                                                     | 26         | 42  | 86  | 32   | 36 | 25  |
| Difficult                                                  | 16         | 21  | 87  | 17   | 22 | 7   |
| JET on the good patch - score threshold of 0.5             |            |     |     |      |    |     |
| Mintseris DB *                                             | 141        | 37  | 85  | 36   | 34 | 23  |
| Enzyme-Inhibitors & Others *                               | 94         | 48  | 84  | 48   | 45 | 34  |
| Enzyme-Inhibitors                                          | 42         | 52  | 80  | 53   | 45 | 35  |
| Antibody-Antigens                                          | 8          | 14  | 86  | 19   | 14 | 1   |
| Antibody-bound Antigens                                    | 13         | 21  | 85  | 21   | 20 | 7   |
| Others *                                                   | 52         | 45  | 88  | 44   | 41 | 33  |
| Rigid *                                                    | 84         | 44  | 82  | 41   | 39 | 27  |
| Medium                                                     | 24         | 43  | 91  | 47   | 42 | 35  |
| Difficult                                                  | 7          | 31  | 93  | 53   | 36 | 30  |

Table S10: **Evaluation of the performance of binding sites predictions.** Different types of predictive scores are considered: NIP[0.4]+JET[0.6], NIP, JET and JET on the patch displaying the highest coverage of the experimental interface. The score cut-off is 0.5, for all types of scores. Performance is evaluated on proteins for which JET predicts at least one cluster overlapping the experimental interface (second column). The \* symbol refers to values computed on subsets that have been cleaned of the complex 1ML0 for which JET provided no interaction site. See also Fig. S77 for the ROC curves reporting the ability of NIP or JET to predict interface residues on the Mintseris dataset and its different subsets.

| Subset Type                  | Protein Type | # proteins | Sen | Spe | Prec | F1 | MCC |
|------------------------------|--------------|------------|-----|-----|------|----|-----|
| Mintseris DB *               | Mono         | 110        | 37  | 82  | 33   | 37 | 19  |
|                              | Multi        | 56         | 18  | 83  | 10   | 18 | 2   |
| Enzyme-Inhibitors & Others * | Mono         | 94         | 40  | 83  | 35   | 40 | 23  |
|                              | Multi        | 28         | 27  | 85  | 17   | 24 | 10  |
| Enzyme-Inhibitors            | Mono         | 42         | 46  | 79  | 43   | 43 | 26  |
|                              | Multi        | 4          | 34  | 87  | 23   | 26 | 19  |
| Antibody-Antigens            | Mono         | 9          | 10  | 76  | 8    | 11 | -13 |
|                              | Multi        | 11         | 6   | 83  | 3    | 6  | -7  |
| Antibody-bound Antigens      | Mono         | 7          | 24  | 79  | 25   | 24 | 5   |
|                              | Multi        | 17         | 11  | 81  | 4    | 9  | -6  |
| Others *                     | Mono         | 52         | 35  | 86  | 29   | 38 | 20  |
|                              | Multi        | 24         | 26  | 85  | 15   | 24 | 9   |
| Rigid *                      | Mono         | 86         | 37  | 80  | 32   | 36 | 17  |
|                              | Multi        | 38         | 14  | 81  | 6    | 13 | -3  |
| Medium                       | Mono         | 16         | 40  | 91  | 40   | 47 | 30  |
|                              | Multi        | 10         | 37  | 86  | 25   | 29 | 20  |
| Difficult                    | Mono         | 8          | 22  | 91  | 27   | 31 | 13  |
|                              | Multi        | 8          | 13  | 89  | 9    | 16 | 2   |

Table S11: **Evaluation of the performance of NIP+JET binding site predictions on monomeric (Mono) and multimeric (Multi) receptors or ligands, using a score cut-off of 0.5.** To properly evaluate NIP+JET performance on a given protein we rely on the following quantities: the number of residues correctly predicted as interacting (true positives, TP), the number of residues correctly predicted as non-interacting (true negatives, TN), the number of non-interacting residues incorrectly predicted as interacting (false positives, FP) and the number of interacting residues incorrectly predicted as non-interacting (false negatives, FN). We use the five standard measures of performance defined in the legend of Table S8.
